1  
2  
3  
4  
5  
6  
7  
8  
9  
10  
11  
12  
13  
14  
15  
16  
17  
18  
19  
20  
21  
22  
23  
24  
25  
26  
27  
28  
29  
30  
31  
32  
33  
34  
35  
36  
37  
38  
39  
40  
41  
42  
43

## **Cohesin depleted cells rebuild functional nuclear compartments after endomitosis**

Marion Cremer<sup>1,\*</sup>, Katharina Brandstetter<sup>2,\*</sup>, Andreas Maiser<sup>2</sup>, Suhas S P Rao<sup>3,4</sup>, Volker Schmid<sup>5</sup>, Miguel Guirao-Ortiz<sup>2</sup>, Namita Mitra<sup>3</sup>, Stefania Mamberti<sup>6</sup>, Kyle N Klein<sup>7</sup>, David M Gilbert<sup>7</sup>, Heinrich Leonhardt<sup>2</sup>, Maria Cristina Cardoso<sup>6</sup>, Erez Lieberman Aiden<sup>3,8,9,10</sup>, Hartmann Harz<sup>2,§</sup>, Thomas Cremer<sup>1,§</sup>

1. Anthropology and Human Genomics, Department Biology II, Ludwig-Maximilians-Universität München, Germany
2. Human Biology & BiImaging, Center for Molecular Biosystems, Department Biology II, Ludwig-Maximilians-Universität München, Germany
3. Center for Genome Architecture, Department of Molecular and Human Genetics, Baylor College of Medicine, Houston, Texas, United States of America
4. Department of Structural Biology, Stanford University School of Medicine, California, United States of America
5. BiImaging Group, Department of Statistics, Ludwig-Maximilians-Universität München, Germany
6. Cell Biology and Epigenetics, Department of Biology, Technische Universität Darmstadt, Germany
7. Department of Biological Science, Florida State University, Tallahassee, Florida, United States of America
8. Center for Theoretical Biological Physics, Rice University, Houston, Texas, United States of America
9. Broad Institute of the Massachusetts Institute of Technology and Harvard University, Cambridge, Massachusetts, United States of America
10. Departments of Computer Science and Computational and Applied Mathematics, Rice University, Houston, Texas, United States of America

\*equal contribution, § corresponding authors

## 44 **Abstract**

45 Cohesin plays an essential role in chromatin loop extrusion, but its impact on a compartmentalized  
46 nuclear architecture, linked to nuclear functions, is debatable. Using live-cell and super-resolved 3D  
47 microscopy, we demonstrate that cohesin depleted cells pass through an endomitosis and rebuild a  
48 single multilobulated nucleus (MLN) with chromosome territories (CTs) pervaded by interchromatin  
49 channels. CTs contain chromatin domain clusters with a zonal organization of repressed chromatin  
50 domains in the interior and transcriptionally competent domains located at the periphery. Splicing  
51 speckles are located nearby within the lining channel system. These clusters form microscopically  
52 defined, active and inactive compartments, which correspond to A/B compartments, detected with  
53 ensemble Hi-C. Functionality of MLN despite continuous absence of cohesin was demonstrated by their  
54 ability to pass through S-phase with typical spatio-temporal patterns of replication domains. Evidence  
55 for structural changes of these domains compared to controls suggests that cohesin is required for their  
56 full integrity.

57

58

59

60

## 61 **Abbreviations**

62 3D FISH = 3D fluorescence in situ hybridization

63 3D SIM = 3D structured illumination microscopy

64 AID = auxin inducible degron

65 ANC / INC = active / inactive nuclear compartment

66 CT = chromosome territory

67 CD(C) = chromatin domain (cluster)

68 CTCF = CCCTC binding factor

69 DAPI = 4',6-diamidino-2-phenylindole

70 EdU = 5-Ethynyl-2'-deoxyuridine

71 Hi-C = chromosome conformation capturing combined with deep sequencing

72 IC = interchromatin compartment

73 MLN = multilobulated nucleus

74 NC = nucleosome cluster

75 PBS = phosphate buffered saline

76 PBST = phosphate buffered saline with 0.02% Tween

77 PR = perichromatin region

78 RD = replication domain

79 RL = replication labeling

80 TAD = topologically associating domain

81

## 82 **Introduction**

83 Cohesin, a ring-like protein complex with its major subunits RAD21, SMC1 and SMC3 exerts  
84 its key functions by tethering distant genomic loci into chromatin loops. It is involved in sister  
85 chromatid entrapment to ensure proper chromosome segregation during mitosis, in double  
86 strand break repair and gene regulation, and importantly was found essential for chromatin  
87 loop extrusion by shaping loops in the sub-Mb range anchored at CTCF/cohesin binding sites  
88 <sup>1-4</sup>, <sup>5,6</sup> for review see <sup>7-13</sup>.

89 These results have argued for an essential role of cohesin in the formation of a  
90 functional nuclear architecture. Studies of the impact of cohesin depletion on nuclear structure  
91 and function have become greatly facilitated by an auxin-inducible degron (AID) system, which  
92 triggers a rapid and selective proteolysis of RAD21 after addition of auxin to the culture medium  
93 resulting in the loss of cohesin from chromatin <sup>14</sup>. Using this system in the colon cancer derived  
94 HCT116-RAD21-mAC cell line, we previously demonstrated the rapid disappearance of  
95 chromatin loop domains with a concomitant loss of topologically associated domains (TADs)  
96 in Hi-C contact matrices averaged over large cell populations, with only minor effects of  
97 cohesin depletion on gene expression <sup>15</sup>. Other studies, using different cell types and  
98 approaches for cohesin elimination yielded similar results, reviewed in <sup>16</sup>.

99 Here, we studied the long-term fate of cohesin depleted cells at the single cell level with  
100 live-cell and super-resolved quantitative microscopy and performed a thorough comparison  
101 with Hi-C and related Repli-seq <sup>17,18</sup> methods. These approaches complement each other in  
102 ways that cannot be achieved by either method alone. Unexpectedly, we observed that  
103 cohesin depleted interphase cells are able to pass through an endomitosis yielding a single  
104 postmitotic cell with a multilobulated cell nucleus (MLN). MLN formation was accompanied by  
105 the rebuilding of chromosome territories (CTs) and the reconstitution of functional A and B  
106 compartments detected by ensemble Hi-C experiments, as well as co-aligned active and  
107 inactive nuclear compartments (ANC / INC) based on microscopic studies, reviewed in <sup>19,20</sup>. In  
108 line with these principal features of a functional nuclear architecture, we found in our present  
109 study that MLN are able to initiate and traverse through S-phase with typical stage specific  
110 patterns of replication domains (RDs). Quantitative 3D image analyses indicated a larger

111 number of RDs together with an increased heterogeneity of RD volumes. TADs, however,  
112 remained missing in ensemble Hi-C studies of cohesin depleted MLN. Our findings  
113 demonstrate the maintenance of spatial arrangements of RDs in the absence of cohesin and  
114 also support a role of cohesin in the compaction of functional higher order chromatin structures  
115 <sup>21</sup>. A joint presentation of results from quantitative 3D microscopy and Hi-C studies is  
116 complicated by a different terminology to describe the structural and functional higher order  
117 chromatin entities discovered by either approach. For a definition of terms as we use them  
118 below, we refer readers to Supplementary Table 1.

119

## 120 **Results**

### 121 **Validation of auxin induced proteolysis of the cohesin subunit RAD21**

122 All experiments of this study were performed with the human colon cancer derived cell line  
123 HCT116-RAD21-mAC <sup>14</sup>, where an auxin-inducible degron (AID) is fused to both endogenous  
124 RAD21 alleles together with a sequence coding for a fluorescent reporter (see Supplementary  
125 Fig.1). About 98% of nuclei in untreated control cell cultures expressed RAD21-mClover.  
126 Selective degradation of RAD21 under auxin treatment (6h in 500  $\mu$ M auxin) was shown by  
127 negative immunostaining with a RAD21 antibody, while epitopes of cohesin subunits SMC1  
128 and SMC3 remained intact under auxin (Supplementary Fig. 2A). RAD21-mClover degradation  
129 was quantitatively assessed by intensity measurements recorded from high throughput  
130 imaging of single cells after 6h auxin treatment (Supplementary Fig. 2B). A visible decline of  
131 RAD21-mClover fluorescence was first noted in time lapse images 30 min after incubation of  
132 cells in 500  $\mu$ M auxin and appeared completed within 4:00h (Supplementary Fig. 3A).  
133 Furthermore, quantitative measurements of RAD21-mClover decline over time were performed  
134 on a single cell level (for details see Supplementary Fig. 3B-C). Notably, ~4% of cells escaped  
135 auxin induced RAD21 degradation. In order to exclude non-responsive cells from further  
136 analyses of the impact of cohesin depletion, RAD21-mClover fluorescence was routinely  
137 recorded in all experiments with auxin treated cell populations except for 3D-FISH experiments  
138 where DNA heat denaturation degrades the reporter fluorescence <sup>22</sup>.

139

140 **Cohesin depleted cells pass through a prolonged endomitosis yielding a daughter cell**  
141 **with one multilobulated nucleus (MLN)**

142 Using time lapse imaging over 21h at  $\Delta t=15\text{min}$ , we compared entrance into mitosis, mitotic  
143 progression and exit in parallel in untreated controls and in cohesin depleted cells, where auxin  
144 was added just before starting live cell observations. In control cells ~80% of all recorded  
145 mitoses ( $n=45$ ) passed mitosis within  $<1\text{h}$  and formed two inconspicuous daughter nuclei. A  
146 second mitosis observed for individual nuclei ~20h after the first division demonstrates their  
147 capacity to divide again under the given observation conditions (Fig. 1A). Notably, about 20%  
148 of mitoses recorded in untreated control cells revealed prolonged mitoses ( $>2\text{h}$ ) followed by  
149 transition into an abnormal cell nucleus (for detailed information on individual nuclei see  
150 Supplementary Table 2), a feature which is not unusual in tumor cell lines (reviewed in <sup>23</sup>). In  
151 cohesin depleted cells ( $n=36$ ) mitotic entrance was inconspicuous (Fig.1B), mitotic progress,  
152 however, was consistently delayed up to 14h (median 4.5h, for detailed information on  
153 individual nuclei see Supplementary Table 2). This prolonged mitotic stage raised the mitotic  
154 index in cohesin depleted cell cultures after 6h in auxin to almost 30% versus ~4% in control  
155 cultures (Supplementary Fig. 4). The delayed mitotic passage was associated with the  
156 formation of abnormal, e.g. multipolar mitotic figures persisting over several hours (Fig.1B).  
157 Fig. 1C depicts a mitotic cell apparently approaching the stage of two separated daughter  
158 nuclei. Despite their seemingly complete separation, these daughter nuclei were presumably  
159 still connected by filaments (see below and Supplementary Fig. 5) and did not complete  
160 karyokinesis. All cohesin depleted cells that were followed through an entire mitosis ( $n=23$ ,  
161 Supplementary Table 2) resulted in the formation of a single multilobulated nucleus (MLN)  
162 within one daughter cell, indicative for an endomitotic event <sup>24</sup>. As a consequence, in cell  
163 cultures fixed 30h after cohesin depletion, MLN accumulated up to ~60% versus ~2% in control  
164 cultures (Supplementary Fig.4). After 50h in cell culture, the number of MLN declined due to  
165 increased apoptosis (data not shown).

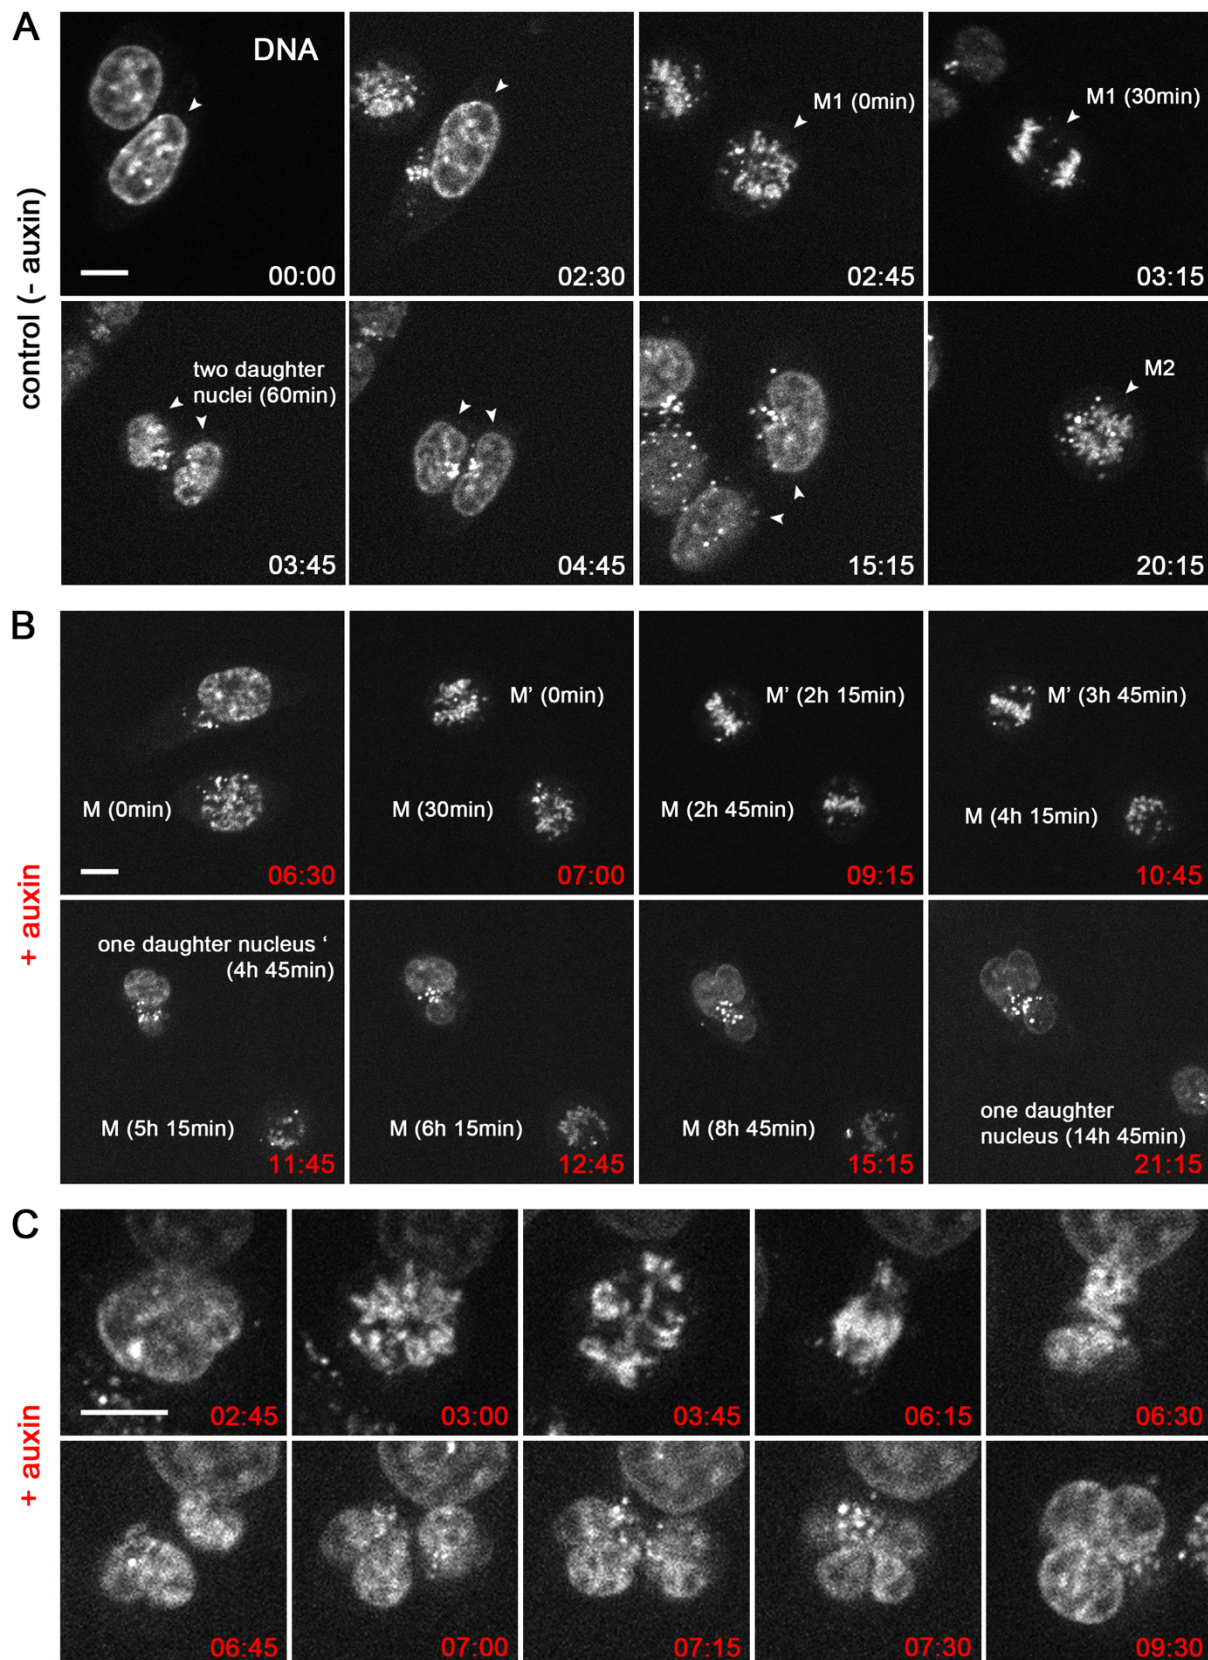

166

167

168

169

170

171

**Fig. 1: Live cell microscopy demonstrating prolonged abnormal mitosis with subsequent formation of one endomitotic multilobulated nucleus (MLN) in cohesin depleted cells.**

**(A)** Selected points from time lapse imaging ( $\Sigma t=21h$ ,  $\Delta t=15min$ ) of untreated control cells (DNA stained with SiR-DNA) with accomplishment of mitosis (M1) within 1h (time 02:45 – 03:45) and

172 subsequent formation of two daughter nuclei. A second mitosis (M2) of one daughter nucleus is  
173 shown at time 20:15. **(B)** Selected time lapse images of nuclei after cohesin degradation conducted  
174 in parallel to control cells demonstrate a prolonged mitotic stage. Mitosis (M) emerges at time 6:30  
175 after auxin treatment, transition into one abnormal multilobulated daughter nucleus (MLN) is seen  
176 14:45h later (time 21:15). Mitosis (M') emerges 7h after auxin treatment (time 07:00), transition into  
177 an MLN is seen 4:45h later (time 11:45). **(C)** Time lapse imaging from the same series at a higher  
178 zoom shows an aberrant mitosis with an adumbrated formation of two daughter nuclei (time 06:45),  
179 that finally appear as one MLN at time 7:15. Scale bar: 10  $\mu$ m.

180 The complete series of time lapse images shown in A-C and raw data of additional observations  
181 are provided in <https://cloud.bio.lmu.de/index.php/s/rZxxkgYExonWLgy?path=%2FFig1>

182

### 183 **Global features of higher order chromatin organization persist after cohesin depletion** 184 **and are restored after mitosis in MLN despite the loss of loop domains**

#### 185 *Maintenance and reconstitution of chromosome territories (CTs)*

186 The capability of cohesin depleted cells to pass through an endomitosis prompted a careful  
187 comparison of the architecture of MLN compared with nuclei from control cultures and cohesin  
188 depleted cells on their way towards endomitosis (referred to as pre-mitotic cohesin depleted  
189 nuclei below). Maintenance of a territorial organization of interphase chromosomes in pre-  
190 mitotic, cohesin depleted cells and the reconstitution of CTs after endomitosis was  
191 demonstrated by chromosome painting of CTs 4, 12 and 19 (Fig. 2). In line with the near-  
192 diploid karyotype of HCT116 cells<sup>25</sup>, two homologous territories of each painted chromosome  
193 were detected in interphase nuclei of both control (Fig. 2A) and pre-mitotic cohesin depleted  
194 cells fixed after 6h in auxin (Fig. 2B). Mitoses occurring in cohesin depleted cell cultures  
195 observed at this time revealed chromatid segregation, though frequently with misalignment  
196 (Fig. 2C). Most MLN fixed in cultures after 30h of auxin treatment revealed four painted  
197 territories for each delineated chromosome (Fig. 2D). Some MLN showed more than four  
198 painted regions with variable sizes, which were occasionally connected by thin chromatin  
199 bridges (Fig. 2D *right panel*, Supplementary Fig. 5). These observations may indicate that  
200 chromatids were torn apart by mechanic forces during lobe formation. Such disruptions might  
201 be enhanced, if we assume a higher level of relaxation and increased mechanical instability of  
202 chromosomes in cohesin depleted nuclei.

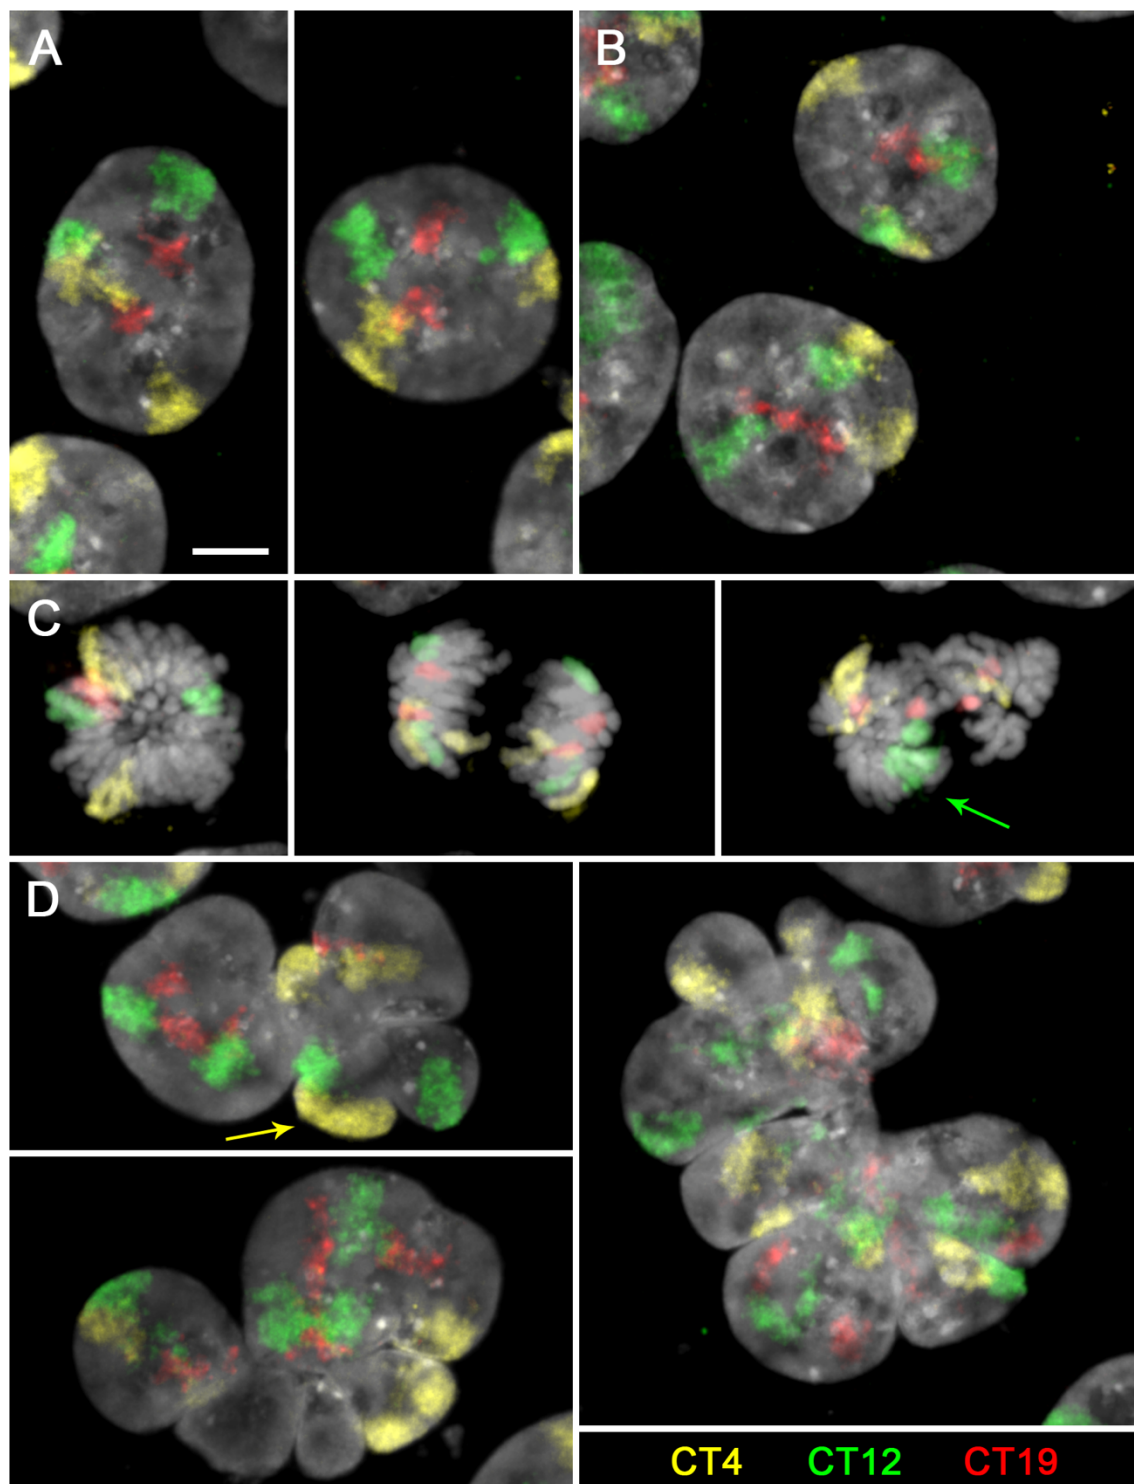

203

204 **Fig. 2: Maintenance of chromosome territories (CTs) in cohesin depleted nuclei and**  
205 **their reconstitution after endomitosis**

206 **(A-E)** Z-projections of entire DAPI stained nuclei (gray) with painted territories of chromosomes 4  
207 (yellow), 12 (green) and 19 (red) acquired by confocal fluorescence microscopy. **(A)** control nuclei  
208 and **(B)** pre-mitotic cohesin depleted nuclei after 6h in auxin show two inconspicuous copies for  
209 each CT. **(C)** Mitoses from 6h auxin treated cultures with two coherent chromosomes in a  
210 (presumably early) metaphase plate (*left*), after chromatid segregation (*mid*) and missegregation  
211 of chromosome 12 (arrow) in an abnormal mitotic figure (*right*). **(D)** *left*: two endomitotic



212 multilobulated nuclei (MLN) with four copies for each CT. Arrow marks two CTs 4 that are overlaid  
213 in the z-projection. *Right:* Large MLN with a torn-up appearance of CTs with seemingly >4 painted  
214 regions for each CT (compare also Supplementary Fig. 5). Scale bar: 5  $\mu$ m. Z-stacks of nuclei shown  
215 in A-D and z-projections of nuclei from additional experiments are provided in  
216 <https://cloud.bio.lmu.de/index.php/s/rZxxkgYExonWLgy?path=%2FFig2>

217

218 *Evidence for co-aligned active and inactive nuclear compartments (ANC-INC) in cohesin*  
219 *depleted cell nuclei*

220 Next, we tested the ability of cohesin depleted cells to preserve in addition to CTs other  
221 structural features of a compartmentalized nuclear architecture with active and inactive nuclear  
222 compartments described in the ANC-INC model<sup>19,20</sup>. For this purpose, we compared DAPI-  
223 stained nuclei of cohesin depleted cells fixed after 6h in auxin, mostly comprising nuclei of the  
224 pre-mitotic interphase, and post-endomitotic MLN fixed after 30 h auxin treatment with control  
225 nuclei of cells cultured without auxin. Functionally relevant markers, delineated by immuno-  
226 detection, included SC35, an integral protein of splicing speckles involved in co-transcriptional  
227 splicing and transcriptional elongation<sup>26</sup>, Ser5P-RNA Pol II, representing a transcription  
228 initiating form<sup>27</sup> (further referred to as RNA Pol II), and histone H3K27me3 conveying a  
229 repressed chromatin state<sup>28</sup>. Two independent experiments (replicates 1 and 2) were  
230 performed with an interval of several months to test the long-term reproducibility of the results.  
231 3D structured illumination microscopy (3D-SIM) was used to obtain stacks of nuclear serial  
232 sections from representative samples for further evaluation with our previously developed  
233 toolbox for 3D image analysis<sup>29</sup>. This toolbox allowed highly resolved measurements of DNA  
234 intensity differences as proxies for chromatin compaction combined with the assignment of  
235 functional markers to regions of different compaction.

236 Figs. 3 and 4 present the combined results from replicates 1 and 2; for a separate  
237 presentation see Supplementary Fig. 6. Fig. 3A-C show typical mid-plane SIM sections of a  
238 control nucleus (A), a pre-mitotic cohesin depleted nucleus (B) and a post-endomitotic MLN  
239 (C). Color-coded voxels were attributed to seven intensity classes with equal intensity variance  
240 and represent the range of DAPI fluorescence intensities in 3D SIM nuclear serial sections.  
241 These color heat maps visualize local differences in DNA compaction<sup>29</sup>. According to the ANC-

242 INC model (see also Supplementary Table 1 for details of terminology), class 1 represents the  
243 interchromatin compartment (IC) with only sparse occurrence of DNA (blue). Chromatin  
244 domains (CDs) attributed to classes 2-7 form chromatin domain clusters (CDCs) with a  
245 nanoscale zonation of euchromatic and heterochromatic regions<sup>20,30</sup>. Classes 2 and 3 (purple  
246 and red) comprise less compacted chromatin, including purple-coded chromatin directly  
247 bordering the IC, termed perichromatin region (PR). Classes 4-6 (orange, light brown, yellow)  
248 comprise facultative heterochromatin with higher compaction, class 7 (white) reflects the most  
249 densely compacted, constitutive heterochromatin. Enlargements of boxed areas in the three  
250 mid-plane nuclear sections of Fig. 3A-C exemplify chromatin domain clusters (CDCs) with a  
251 zonal organization of less compact chromatin domains at the periphery adjacent to the IC and  
252 higher compacted chromatin located in the CDC interior. Each CT is built from a number of  
253 CDCs, which in turn form higher order chromatin networks expanding throughout the nuclear  
254 space. 3D FISH with appropriate probes is required to identify individual CTs (Fig. 2) and CDCs  
255 (see Discussion).

256 Relative fractions of voxels assigned to each of the seven DAPI intensity classes  
257 yielded similar patterns for control nuclei, pre-mitotic cohesin depleted nuclei and post-  
258 endomitotic MLN. (Fig. 3D). Fig. 3E presents estimates of nuclear volumes derived from 3D  
259 SIM serial sections. Whereas volumes of pre-mitotic cohesin depleted nuclei are similar to  
260 controls, the distinctly increased nuclear volume in MLN (30h auxin) corresponds with a further  
261 increase of a 2n DNA content immediately after endomitosis to a 4n DNA content  
262 (Supplementary Fig. 7) after passing through another round of DNA replication (see below).  
263 IC-channels expanding between lamina associated chromatin (Supplementary Fig. 8A-F)  
264 further illustrate the strikingly similar nuclear topography of higher order chromatin organization  
265 present in control nuclei, pre-mitotic cohesin depleted nuclei and post-endomitotic MLN. 3D  
266 image stacks reveal the integration of IC-channels and lacunas into an interconnected 3D  
267 network with direct connections to nuclear pores.<sup>20,31</sup>

268

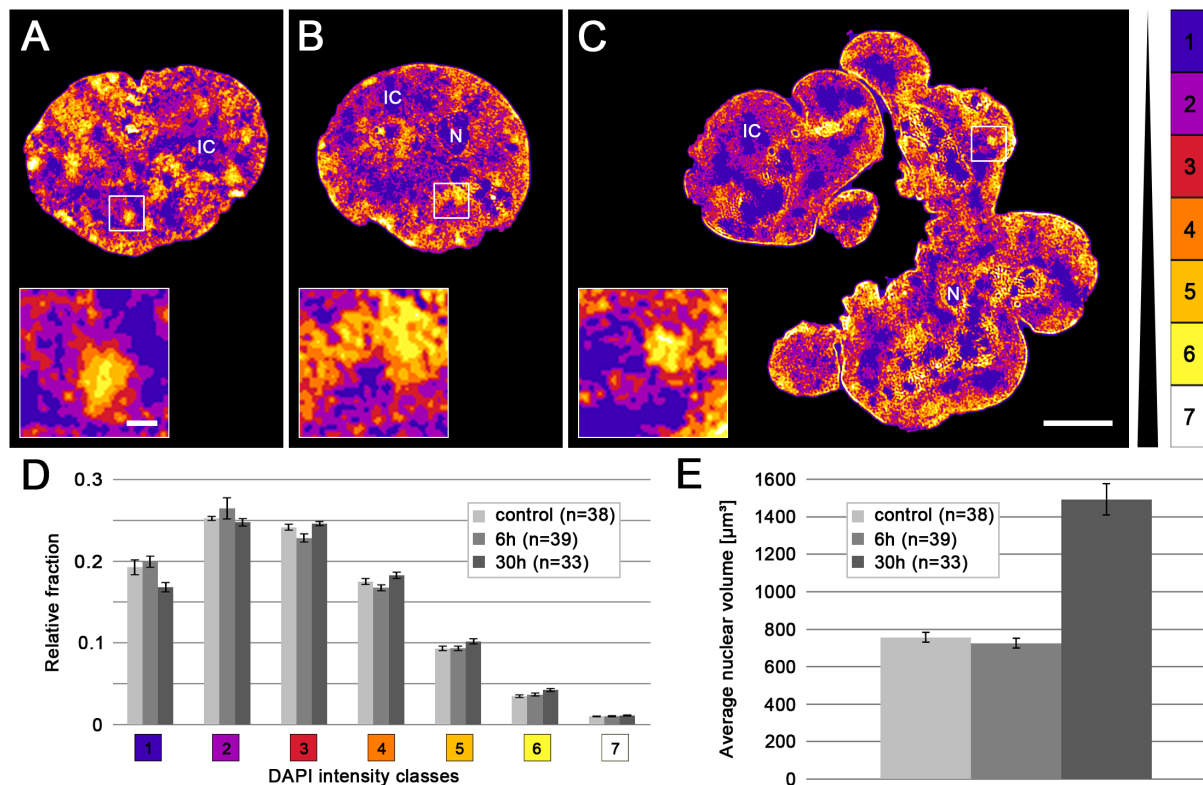

269

270 **Fig. 3: Compartmentalized architecture with an IC channel network pervading chromatin**  
 271 **domain clusters (CDC) with zonal compaction differences in controls and cohesin depleted,**  
 272 **pre- and post-endomitotic nuclei**

273 **(A-C)** DAPI stained mid-sections of representative nuclei acquired by 3D-SIM from **(A)** control  
 274 nucleus; **(B)** cohesin depleted nucleus (6h auxin); **(C)** cohesin depleted multilobulated nucleus  
 275 (MLN) (30h auxin) are displayed by seven DAPI intensity classes in false colors, used as proxies  
 276 for chromatin compaction<sup>29</sup>. Class 1 (*blue*) pixels close to background intensity, largely reflecting  
 277 the interchromatin compartment (IC) with only sparse DNA, class 7 (*white*) pixels with highest  
 278 intensities (color code on the right). All nuclei in A-C reveal a network of chromatin domain clusters  
 279 (CDCs) comprising a compacted core and a surrounding low-density zone co-aligned with class 1  
 280 regions that meander between CDCs as part of the IC (see insets). Likewise, all nuclei display a  
 281 rim of compacted (hetero)chromatin at the nuclear periphery. N = nucleolus; IC = interchromatin  
 282 channels/lacunae. Scale bars: 5 μm, insets: 0.5 μm **(D)** Relative 3D signal distributions of DAPI  
 283 intensity classes in control nuclei and cohesin depleted nuclei show an overall similar profile. **(E)**  
 284 Average nuclear volumes from the same series of nuclei. The ~2-fold increase of nuclear volumes  
 285 in (post-endomitotic) MLN after 30h auxin likely reflects their further increase of a 2n DNA content  
 286 immediately after endomitosis to a 4n DNA content after another round of DNA replication (compare  
 287 Fig. 6 E), for statistical tests see Supplementary Table 3. Complete image stacks from nuclei shown  
 288 in A-C, data for DAPI intensity classifications and nuclear volumes in individual nuclei are provided  
 289 in <https://cloud.bio.lmu.de/index.php/s/rZxxkgYExonWLgy?path=%2FFig3>

290

291 Fig. 4A-F shows nuclear sections with DAPI stained DNA (gray) together with

292 immunostained SC35 (red) and H3K27me3 (green) (A-C) or immunostained RNA Pol II.  
293 Supplementary Fig. 6A-C demonstrates a range of compaction differences between SC35  
294 marked speckles in both control and cohesin depleted nuclei. These examples illustrate the  
295 cell-to-cell variability of the nuclear landscape, which cannot be captured by a 'typical' one-for-  
296 all image. We did not further pursue the question, whether this structural variability reflects  
297 functional differences between individual cells in the non-synchronized cell populations studied  
298 here. In 3D SIM stacks of control and cohesin depleted nuclei we determined the relative  
299 fractions of voxels representing SC35, H3K27me3 and RNA Pol II, respectively, in relation to  
300 the seven DAPI intensity classes <sup>29</sup>. By comparison of the relative fractions of marker voxels  
301 with DAPI related voxels, we tested for each class, whether a given marker showed a relative  
302 enrichment (over-representation) or relative depletion (under-representation) compared with  
303 the null-hypothesis of a random distribution (Fig. 4 G,H). Statistical tests are listed in  
304 Supplementary Table 3. Fig. 4G indicates a pronounced enrichment of SC35 in class 1 (IC),  
305 but a relative depletion in classes 2 and 3 (PR), and a virtual absence in higher classes. In  
306 contrast, H3K27me3, a marker of facultative heterochromatin, was under-represented in  
307 classes 1 and 2, but clearly enriched in classes 4 and 5. For RNA Pol II (Fig. 4H) we noted the  
308 most pronounced relative enrichment in class 2 and relative depletion in classes 4-7.

309 The separate presentation of both replicates (Supplementary Fig. 6D-E) consistently  
310 supports an enrichment of SC35 in class 1, and of H3K27me3 in class 4 and 5. The particular  
311 enrichment of H3K27me3 in classes 3 and 4 and depletion in class 7 is in line with its  
312 assignment as a marker for facultative heterochromatin <sup>32</sup>. Enrichment-depletion patterns of  
313 RNA Pol II in the two replicates agree with respect to a general enrichment of RNA Pol II in  
314 the ANC (class 1-3), and a depletion within the INC, but differ markedly in quantitative details.  
315 Whereas replicate 1 shows a pronounced relative enrichment of this enzyme in class 1 and 2  
316 in line with a relative depletion in classes 3 to 7, replicate 2 shows modest RNA Pol II  
317 enrichments in classes 2 and 3, together with relative depletions in classes 5-7, but  
318 unexpectedly also in class 1 (IC).

319

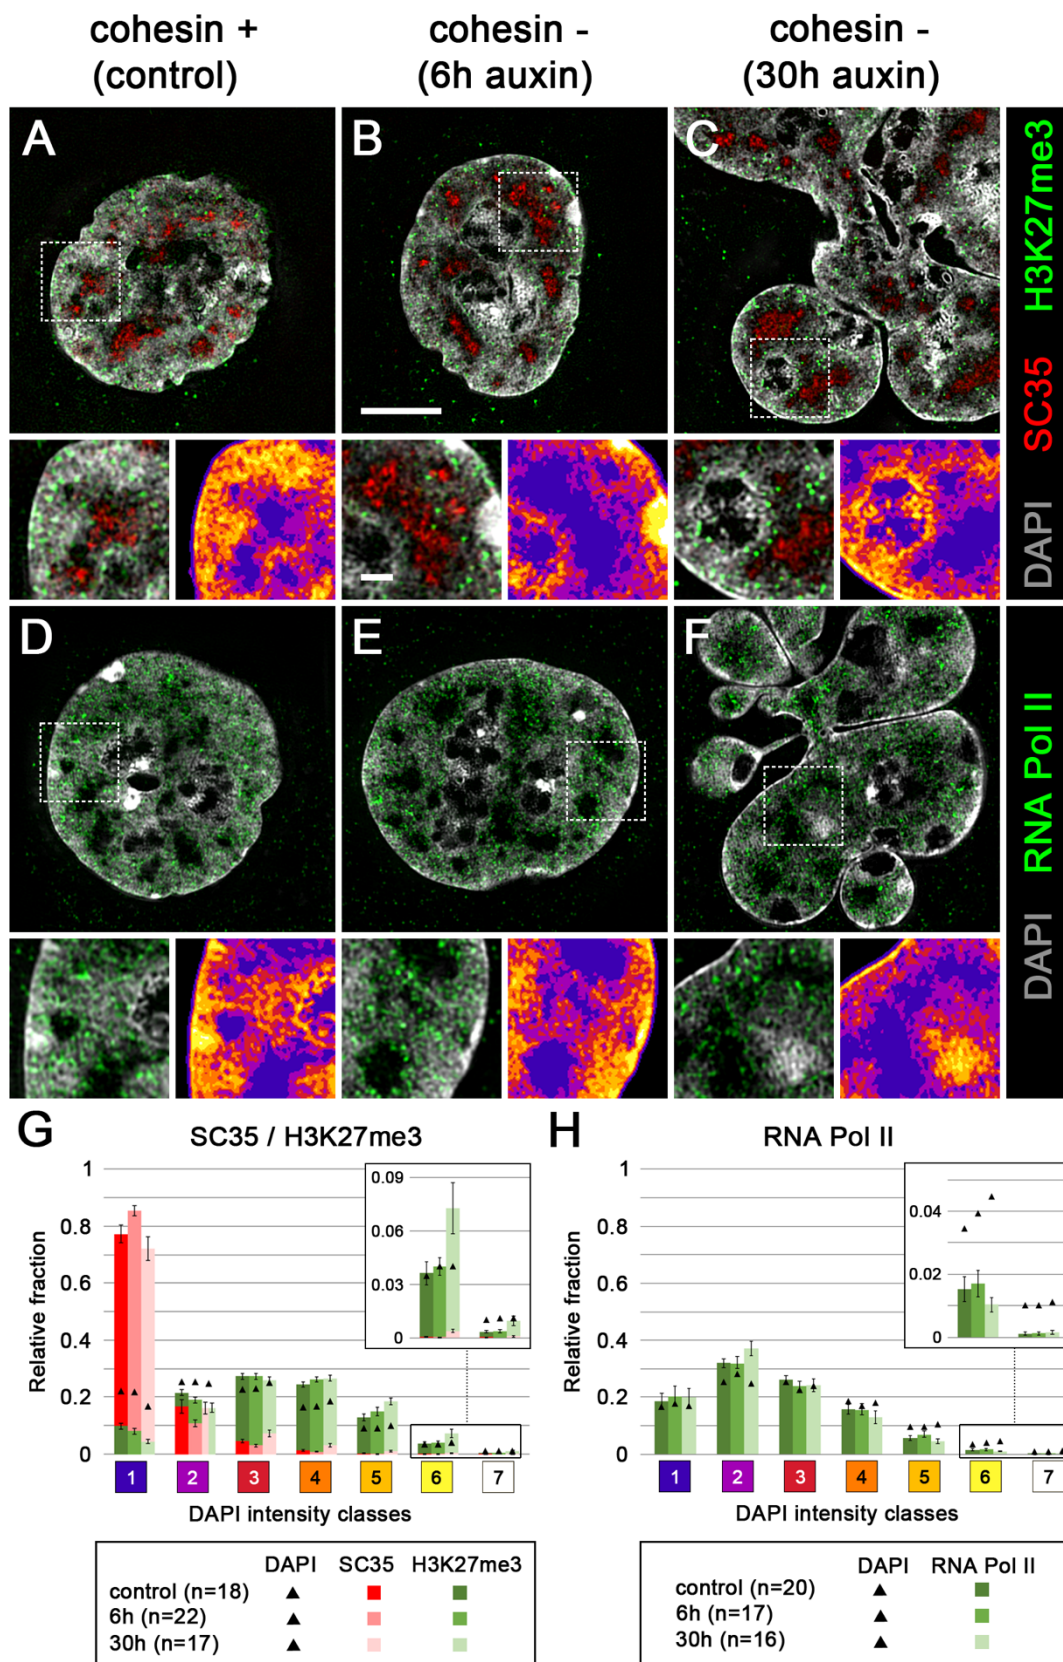

320  
321

322 **Fig. 4: Nuclei of control and cohesin depleted cells show a congruent 3D topography of**  
323 **SC35, H3K27me3 and RNA Pol II**

324 **(A-F)** DAPI stained nuclear mid-sections (gray) displayed from 3D SIM image stacks of control  
325 nuclei (A,D), pre-mitotic, cohesin depleted nuclei after 6h auxin treatment (B,E), and post-

326 endomitotic MLN after 30h auxin treatment reveal the topography of immunostained SC35 (red)  
327 and H3K27me3 (green) (A-C), or active RNA Pol II (red) (D-F). Scale bar: 5  $\mu$ m. An enlargement  
328 of a representative, boxed area is shown (left) beneath each mid-section (left side), together the  
329 color-coded DAPI intensity heat map (right) (compare Fig. 3). Scale bar: 1  $\mu$ m. SC-35 marked  
330 splicing speckles are located in the interchromatin compartment (IC)(blue), H3K27me3 marks are  
331 distributed within neighboring chromatin domain clusters; RNA Pol II is mainly enriched in  
332 chromatin lining the IC (purple), but also extends into the IC, whereas it is largely excluded from  
333 densely compacted chromatin regions (brown and yellow). **(G, H)** 3D image analyses of 3D SIM  
334 stacks (n: number of nuclei) shows the relative fraction of SC35 (red) and H3K27me3 (green)  
335 signals (G), and of active RNA Pol II (green) (H) in comparison to DAPI intensity classes 1-7 marked  
336 as black triangles. Complete image stacks from nuclei shown in A-F, marker distribution on DAPI  
337 intensity classes on individual nuclei and additional image stacks from two independent (replica)  
338 experimental series are provided in  
339 <https://cloud.bio.lmu.de/index.php/s/rZxxkgYExonWLgy?path=%2FFig4>

340  
341 It is important to bear in mind that *relative* enrichments and depletions of epigenetic  
342 markers and functional proteins were defined in the 7 DAPI intensity classes. Differences  
343 between replicates 1 and 2 that represent snap-shots from the respective experiments may be  
344 attributed to unperceived differences of cell culture conditions. Notwithstanding these  
345 differences, both replicates support our major conclusion: Principal features of a  
346 compartmentalized organization with CTs and CDCs, pervaded by the IC in control nuclei were  
347 maintained in pre-mitotic, cohesin depleted nuclei and were rebuilt in post-endomitotic MLN,  
348 where individual macromolecules may penetrate into highly compacted CDs while  
349 macromolecular aggregates, such as a transcription machinery (RNA Pol II) or splicing  
350 machinery (SC35) may be excluded<sup>19,33</sup>.

351  
352 *In situ Hi-C data indicate the maintenance/rebuilding of A and B compartments in cohesin*  
353 *depleted pre- mitotic nuclei and post-endomitotic MLN*

354 In situ Hi-C of cell cultures, treated with auxin for 6 and 28h, respectively, prior to fixation,  
355 confirmed the disappearance of loop domains (Fig. 5A) in contrast to control cultures, whereas  
356 A and B compartments were maintained (Fig. 5B). Since most cells had passed an endomitosis  
357 with the formation of MLN after 28-30 h auxin treatment (Supplementary Fig. 4), we conclude  
358 that these findings are representative for both cohesin depleted pre-mitotic nuclei and post-

359 endomitotic MLN. A heightened compartmentalization was noted in particular with regard to B-  
360 type chromatin, as previously described for pre-mitotic cohesin depleted cells <sup>15</sup>. Strengthened  
361 interactions between this B-type compartment could be readily observed even in our low depth  
362 data from 28 h auxin treated cells (Fig. 5C, lower right panel, interactions between loci  
363 annotated in yellow). While the functional identity or significance of this particular B-type  
364 subcompartment remains unknown, we were able to identify by k-means clustering of histone  
365 modification data for HCT116-RAD21-mAC cells <sup>15</sup> a histone modification cluster (consisting  
366 of depletion of both activating marks like H3K36me3 and H3K27ac and repressive marks such  
367 as H3K27me3 and H3K9me3, but a mild enrichment of H3K79me2) that corresponded to the  
368 positions of this particular B-type subcompartment (Fig. 5D, E; cluster 4). Genome-wide  
369 analysis of the average Hi-C contact frequencies between the histone modification clusters  
370 demonstrated a strong enrichment for within-cluster contacts for this B-type subcompartment  
371 at both 6 h and 28 h after cohesin degradation, and additionally, at 28 h, mild cohesin-  
372 degradation induced enrichment of interactions between this B-type subcompartment and  
373 clusters enriched for repressive histone modifications as well as depletion of interactions with  
374 clusters enriched for activating histone modifications. The comparison of ensemble Hi-C data  
375 with microscopic data described above supports the argument that A/B compartments and  
376 ANC/INC compartments reflect the same structures (see Discussion).

377

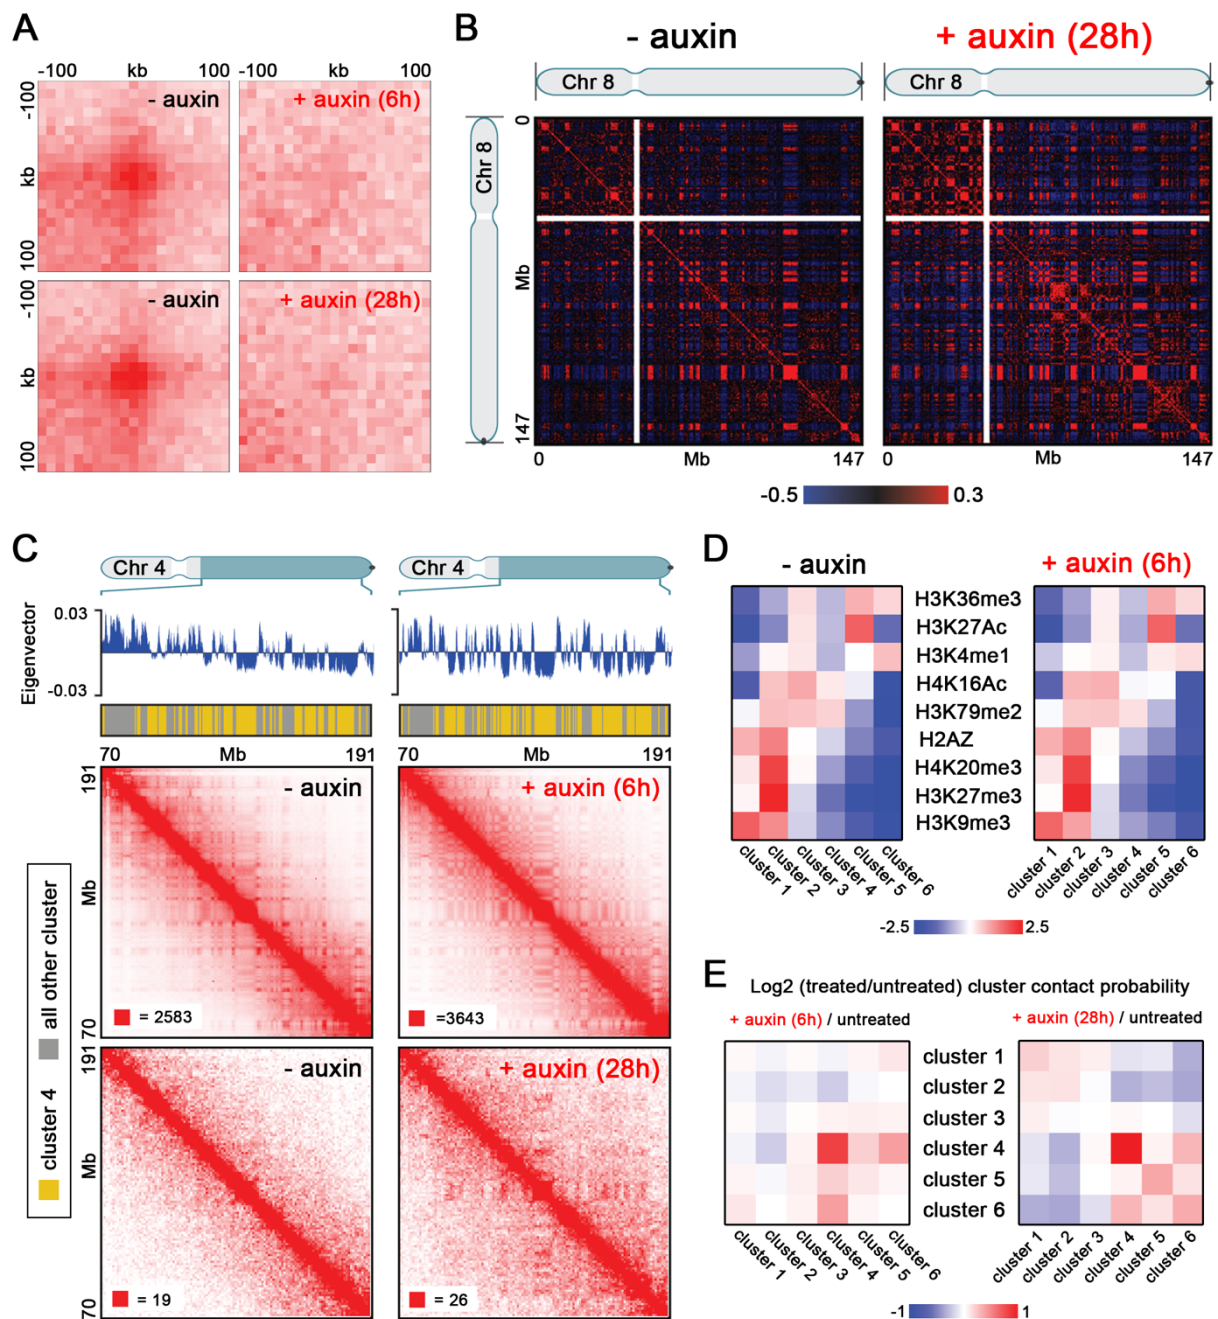

378

379 **Fig. 5: Hi-C data indicate elimination of chromatin loops, but maintenance of A and B**  
 380 **compartments in cohesin depleted pre- and postmitotic cells**

381 **(A)** Aggregate peak analysis (APA) plots using loops identified in HCT116-RAD21-mAC cells<sup>15</sup>  
 382 before and after 6h of auxin treatment (top) or before and after 28h of auxin treatment (bottom).  
 383 For each of the treated timepoints, the matched untreated control (harvested at the same time) is  
 384 plotted next to it. The plot displays the total number of contacts that lie within the entire putative  
 385 peak set at the center of the matrix. Loop strength is indicated by the extent of focal enrichment at  
 386 the center of the plot. **(B)** Pearson's correlation maps at 500 kb resolution for chromosome 8 before  
 387 (left) and after (right) 28h of auxin treatment. The plaid pattern in the Pearson's map, indicating  
 388 compartmentalization, is preserved in cohesin depleted nuclei even after 28h of auxin treatment.  
 389 **(C)** Contact matrices for chromosome 4 between 70 Mb and 191 Mb at 500 kb resolution before  
 390 (left) and after (right) cohesin depletion. The 6h cohesin depletion time is shown on top, and 28h



391 depletion time on the bottom. K-means clustering of histone modifications at 25 kb resolution into  
392 six clusters annotates loci corresponding to specific subcompartments. Interactions for loci in  
393 cluster 4 (arbitrary numbering, annotated in yellow on top tracks) are strengthened after both 6h  
394 and 28h of cohesin depletion. All loci belonging to clusters other than cluster 4 are annotated in  
395 gray in the top track. The max color threshold (red) of the heatmap is illustrated in the lower left  
396 corner of each heatmap, the minimum color threshold (white) is 0 reads. **(D)** Log-2 fold ratios of  
397 between-cluster Hi-C contact probabilities post- and pre- cohesin degradation are shown for the  
398 six clusters identified via K-means clustering of histone modifications. Cluster 4 shows strong  
399 contact probability enrichment after cohesin degradation at both the 6hr and 28hr timepoints. **(E)**  
400 For each of the 6 histone modification clusters, the average log2-fold enrichment for each histone  
401 modification over all loci in that cluster is shown both post- and pre- cohesin degradation. Patterns  
402 of histone modifications across the clusters as unchanged by cohesin degradation.

403

#### 404 *Persistence of typical S-phase stage replication patterns after cohesin depletion*

405 The next part of our study shows that the structural compartmentalization of pre-mitotic,  
406 cohesin depleted cells and post-endomitotic MLN corresponds with their functional capability  
407 to maintain replication domains and to proceed through S-phase. The temporal order of  
408 replication is highly coupled with genome architecture, resulting in typical patterns for early,  
409 mid and late replication timing <sup>34</sup>. Replication domains (RDs) were chosen in our study as  
410 microscopically visible reference structures, which correspond to microscopically defined  
411 chromatin domains (CDs) and persist as stable chromatin entities throughout interphase and  
412 during subsequent cell cycles <sup>35-37</sup> (Supplementary Table 1). Replicating DNA was visualized  
413 by pulse replication labeling (RL) (see Methods). Control cultures were fixed 6h after RL (Fig.  
414 6A), cultures prepared for cohesin depletion were further grown after RL for 1h under normal  
415 medium conditions and then exposed to auxin for 6h (Fig. 6 B,C) or 30h (Fig. 6D) before  
416 fixation. Both controls (A) and auxin-treated cells (B,D) revealed nuclei with typical RD patterns  
417 for different S-phase stages. This experiment demonstrates that different RD patterns persist  
418 during the subsequent pre-mitotic interphase of cohesin depleted cells (Fig. 6B) and can be  
419 fully reconstituted in post-endomitotic MLN (Fig. 6D). Notably, structural entities reflecting RDs  
420 pulse-labeled during S-phase can be identified along mitotic chromosomes (Fig. 6C). Fig. 6D  
421 demonstrates the ability of MLN to initiate a new S-phase with the formation of typical  
422 replication patterns.

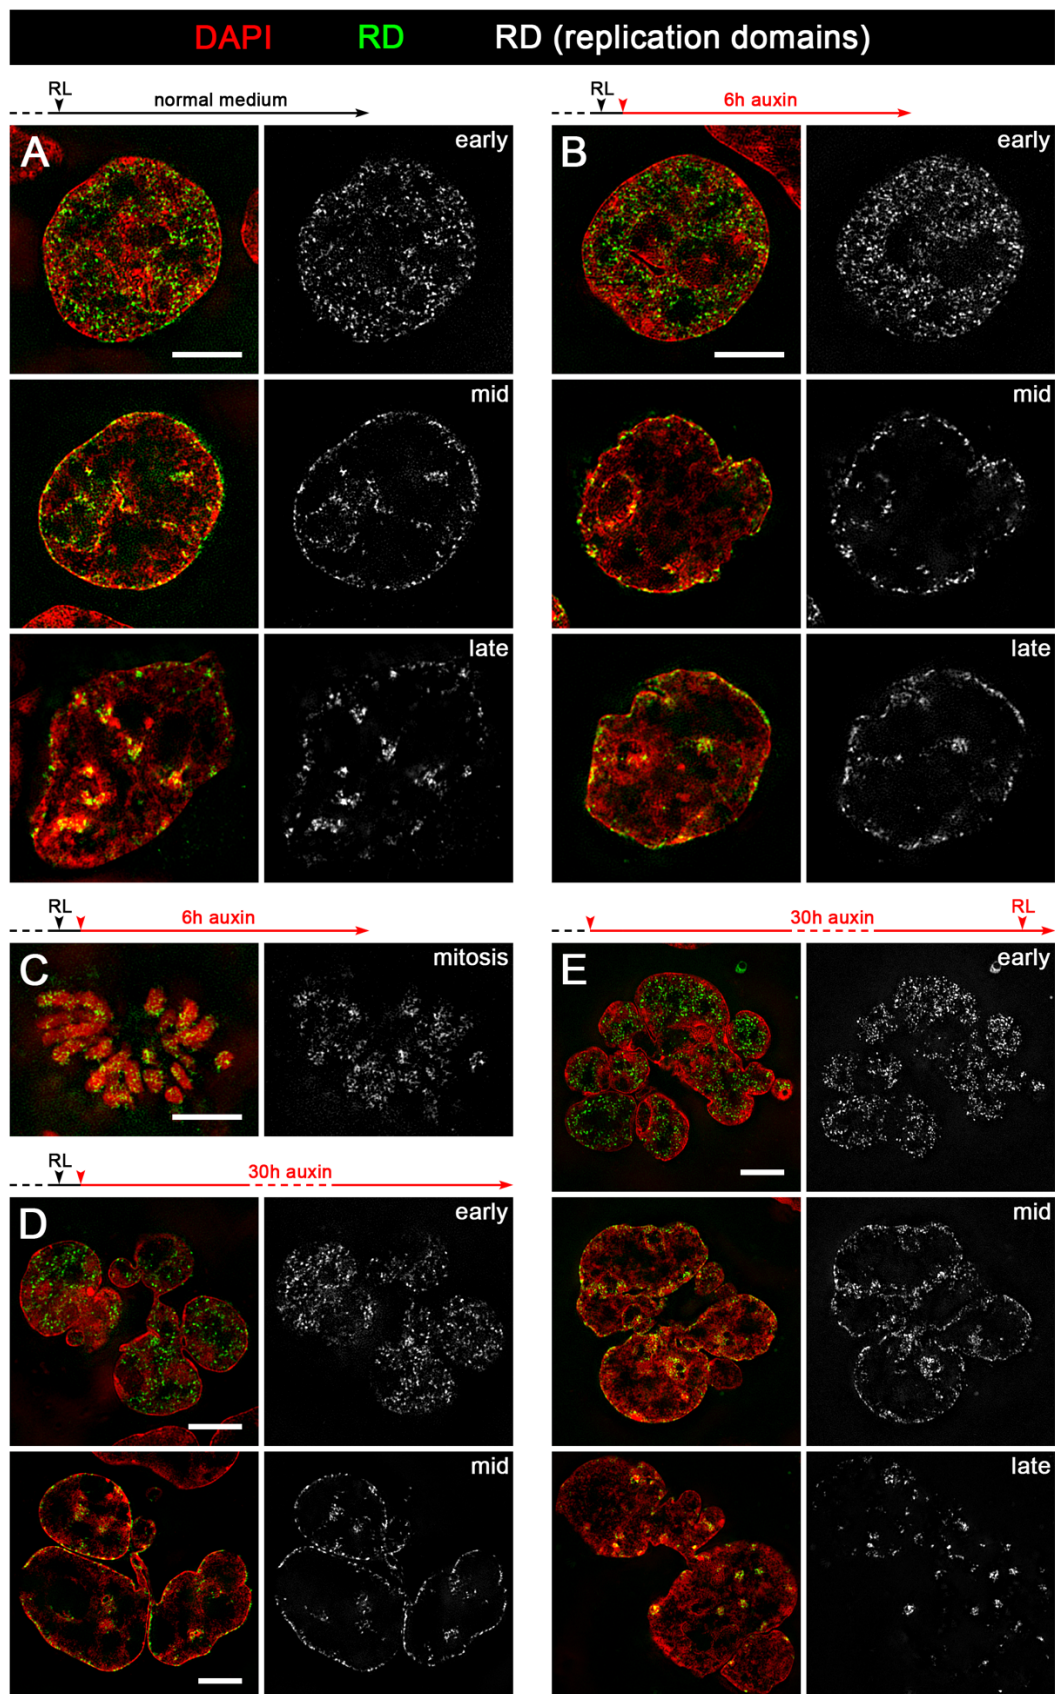

423

424 **Fig. 6: Maintenance, postmitotic rebuilding and de novo formation of typical**  
425 **replication patterns after cohesin depletion**

426 (A-E) Overlay images (left) show representative SIM sections of DAPI stained nuclei (red) with  
427 replication domains (RDs)(green) identified by replication labeling (RL) in different stages of S-

428 phase. RDs in the same nuclear sections are also displayed in gray (right). **(A)** Control nuclei fixed  
429 6h after RL with typical patterns for early, mid and late replication, respectively. **(B)** Maintenance  
430 of the same typical replication patterns in nuclei of cohesin depleted, pre-mitotic cells fixed 6 h after  
431 RL. **(C)** Cohesin depleted mitotic cell with replication labeled chromatin domains obtained under  
432 conditions as described in (B). **(D)** RD patterns in individual lobuli demonstrate the ability of post-  
433 endomitotic MLN to restore RD patterns, generated by RL during the previous cell cycle. Cells were  
434 treated with auxin for 30h after RL. **(E)** RL carried out with MLN obtained after ~30 h auxin treatment  
435 demonstrates *de novo* DNA synthesis with formation of new typical replication patterns. Scale bar:  
436 5  $\mu$ m. Raw data of complete image stacks from nuclei shown in A-E and additional image stacks  
437 from independent experimental series are provided in

438 <https://cloud.bio.lmu.de/index.php/s/rZxxkgYExonWLGy?path=%2FFig6>

439

440 *Same replication timing for cohesin depleted and non-depleted control cells seen by Hi-C*

441 *and Repli-Seq data*

442 Using Repli-Seq and Hi-C analysis, replication timing was measured by the ratio of early to  
443 late replicating DNA and was found preserved upon cohesin depletion (Fig. 7A-B), consistent  
444 with a prior report<sup>38</sup>. Additionally, the tight relationship between genome A/B  
445 compartmentalization and replication timing was similarly maintained in the absence of  
446 cohesin, exemplified for chr. 8 (Fig. 7A). Data were based on at least two replicates of each  
447 timepoint and confirmed reproducibility of results.

448

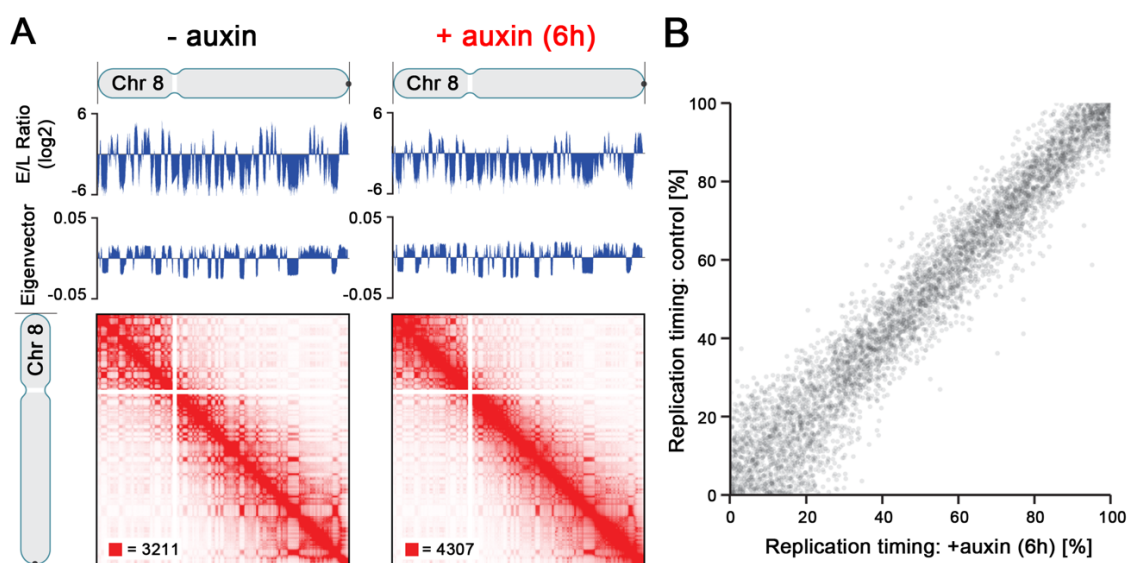

449

450 **Fig. 7: Hi-C and Repli-Seq data demonstrate the same replication timing for cohesin**  
451 **depleted and non-depleted control cells**

452 **(A)** Contact matrices of chromosome 8 at 500 kb resolution along with the corresponding Repli-

453 Seq early-to-late (E/L) ratio tracks at 50 kb resolution and the first eigenvectors of the Hi-C matrices  
454 corresponding to A/B compartmentalization. Replication timing along the genome is conserved, as  
455 shown by the correspondence of the untreated and auxin-treated Repli-Seq tracks. In addition, the  
456 correspondence between replication timing and genome compartmentalization (as indicated by the  
457 plaid pattern in the Hi-C map and the first eigenvector of the Hi-C matrices) is preserved after auxin  
458 treatment. **(B)** Scatter plot of replication timing (percentile of E/L ratio) in RAD21-mAC cells before  
459 (y-axis) and after (x-axis) auxin treatment.

460

#### 461 **Structural changes of replication domains in cohesin depleted nuclei**

462 Finally, we tested whether cohesin depletion results in structural changes of individual RDs,  
463 detectable on the resolution level of 3D-SIM (Fig. 8). For this purpose, RD counts and RD  
464 volumes were evaluated in nuclei of three cultures: The 'control' culture was fixed 6h after RL  
465 together with the '6h auxin' culture, which was incubated with auxin immediately after RL. The  
466 '30h auxin' culture was fixed after 30h in auxin, when most cells had passed an endomitosis  
467 yielding a multilobulated cell nucleus. Nuclei with RD patterns typical for early S-phase at the  
468 time of pulse labeling were identified in the three fixed cultures and 3D serial image stacks of  
469 such nuclei were recorded with SIM and used for measurements in entire nuclei. It is important  
470 to note that an RD pattern generated by pulse labeling in a given nucleus is maintained after  
471 S-phase and after mitosis, independent of the time of fixation during the post-endomitotic  
472 interphase of MLN. Therefore, controls and auxin-depleted cells fixed 6 h after RL proceeded  
473 to G2, but still showed the early S-phase RD pattern. In the culture fixed 30 h in auxin, we  
474 identified MLN also showing early replication patterns. Fig. 8A shows examples of such nuclei  
475 from the control culture (left) and the cohesin depleted cultures fixed 6 h (middle) and from  
476 MLN cells fixed 30 h after RL (right). Fig. 8B presents average numbers of segmented RDs for  
477 individual nuclei. Fig.8C shows the results of volume estimates for individual RDs. Compared  
478 with controls, we noted an increase of both RD numbers and volumes together with an increase  
479 of heterogeneity (broader range of number and size distribution) in cohesin depleted pre-  
480 mitotic nuclei and post-endomitotic MLN. Based on the concordant increase of counts and  
481 volumes of segmented RDs in cohesin depleted nuclei in comparison with control nuclei, we  
482 tentatively conclude that cohesin is indispensable to prevent disintegration and decompaction  
483 of RDs (see Discussion).

484

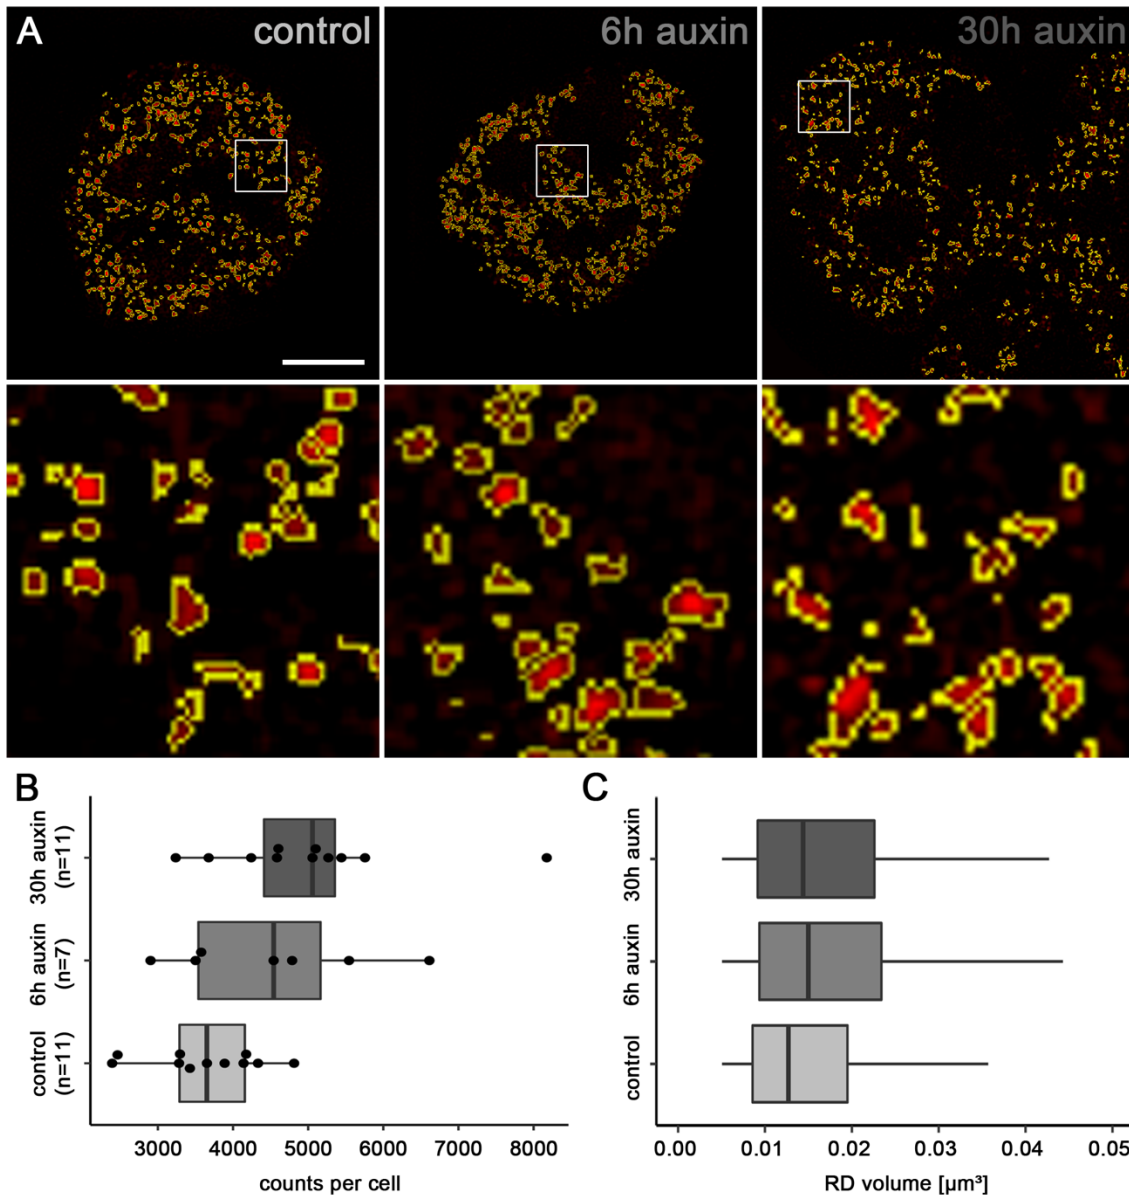

485

486 **Fig. 8: Segmentation of individual replication domains (RDs), pulse-labeled in early S-phase,**  
487 **indicate structural changes after cohesin depletion**

488 **(A)** SIM nuclear mid-sections of nuclei with typical early S-phase patterns of RDs from a control  
489 culture (left) and an auxin treated culture (middle), both fixed 6 h after RL, and for 6h with auxin, and  
490 a multilobulated nucleus (right) *obtained* after 30h auxin treatment (compare Fig. 6 A-D).  
491 Enlargements of boxed areas show individual, segmented RDs displayed in red with segmented  
492 borders lined in yellow. Scale bar: 4  $\mu\text{m}$ , 0.5  $\mu\text{m}$  in inset magnifications. **(B)** Counts of segmented  
493 RDs plotted for 11 control nuclei, 7 cohesin depleted nuclei after 6h auxin, and 11 MLN after 30h  
494 auxin are presented as dots. Boxplots indicate the median with 25%-75% quartiles. **(C)** Boxplots with  
495 corresponding volume distributions of segmented, individual RDs (39.334 (control), 31.467 (6h  
496 auxin) and 55.153 (30h auxin). Lines demarcate minimum and maximum values. The non-parametric  
497 Mann-Whitney test revealed significant differences of RD counts between control nuclei and MLN ( $p$   
498 = 0.012) and for RD volumes ( $p < 0.0001$  for control  $\leftrightarrow$  6h auxin, control  $\leftrightarrow$  30h auxin, and 6h auxin

499 <-> 30h auxin) (Supplementary Table 3). Volumes of RDs with dimensions below the resolution limit  
500 of 3D-SIM (~120 nm lateral / 300 nm axial) show the same size and were excluded from  
501 consideration. Accordingly, the lower limits of volumes between control nuclei and cohesin depleted  
502 nuclei are identical in contrast to the differences of the upper volume limits. Single values for  
503 individual nuclei are provided in

504 <https://cloud.bio.lmu.de/index.php/s/rZxxkgYExonWLgy?path=%2FFig3>

505

### 506 **Effect of cohesin depletion on DNA halo induced chromatin loops**

507 An effect of cohesin depletion on chromatin loop structure was supported by a DNA halo  
508 approach, a technique to investigate changes in chromatin organization at the level of DNA  
509 loops<sup>39</sup>. Histone extraction in interphase nuclei by high-salt incubation triggers the extrusion  
510 of chromatin loops from a densely stained central chromatin core thus providing a measure of  
511 their size. DAPI stained nuclei of cohesin depleted cells (6h auxin treatment) exhibited halos  
512 that were significantly larger and more variable in shape in comparison to the defined and  
513 compacted halos of control cells (Supplementary Fig. 9) in line with the recently described  
514 observation that the cohesin-NIPBL complex compacts DNA by extruding DNA loops<sup>21</sup>.

515

### 516 **Discussion**

517 Our study demonstrates that multilobulated nuclei (MLN), that arise from cohesin depleted  
518 cells after passing through an endomitosis, retain the ability to rebuild a compartmentalized  
519 nuclear architecture. Whereas ensemble Hi-C confirmed the continued absence of chromatin  
520 loops and TADs in MLN as in pre-mitotic cohesin depleted nuclei, A and B compartments were  
521 fully restored in MLN in line with active and inactive nuclear compartments (ANC and INC,<sup>19,20</sup>)  
522 revealed by 3D SIM. In light of the fundamental roles ascribed to cohesin, the capacity of MLN  
523 to initiate another round of DNA replication with stage-specific patterns of replication domains  
524 (RDs) was not expected.

525 Progression of cells into a disturbed and prolonged mitosis after cohesin depletion by  
526 Rad21 siRNA transfection was described in previous live cell studies covering ~4h<sup>40</sup>. By  
527 extending the live cell observation period up to 20h, we discovered a so far unreported  
528 endomitosis with chromatid segregation, but apparent failure to complete karyokinesis and  
529 cytokinesis. This failure may be attributed to the impact of cohesin for proper spindle pole

530 formation and kinetochore-microtubule attachment (reviewed in <sup>7,8</sup>). Notably, in vertebrates  
531 loading of cohesin onto DNA already occurs in telophase <sup>7</sup>, which may be essential for  
532 subsequent cytokinesis and daughter cell formation. Factors promoting endomitosis and the  
533 formation of MLN are, however, complex and certainly diverse <sup>41</sup>. Multipolar endomitosis with  
534 the formation of polyploid MLN occurs physiologically in megakaryocytes <sup>42</sup> and in (cohesin  
535 competent) tumor cell lines <sup>43</sup>, in part entailing extensive chromosomal rearrangements <sup>44</sup>. The  
536 observation of MLN as the mitotic outcome in ~2% of HCT116-RAD21-mAC control cells  
537 exemplifies the spontaneous occurrence of MLN in a near-diploid tumor cell line.

538 Hi-C and related methods offer the great advantage of a genome wide approach to  
539 explore a nuclear compartmentalization at the DNA sequence level. This approach  
540 demonstrated a compartmentalized architecture of the landscape in cohesin depleted cell  
541 nuclei <sup>3,16</sup>, but failed to detect the profound global morphological changes in post-endomitotic  
542 cohesin depleted MLN compared to cohesin depleted nuclei before passing through  
543 endomitosis. High-resolution microscopy is also the method of choice to examine the 3D  
544 structure of chromatin domain clusters (CDCs) with a zonal organization of repressed  
545 (condensed) and transcriptionally competent (decondensed) chromatin domains and the  
546 actual 3D configuration of the interchromatin compartment (IC) <sup>45</sup> with its supposed function  
547 as storage and transport system <sup>19</sup> that co-evolved with higher order chromatin organization  
548 <sup>46</sup>. Our results exemplify the necessity to combine bottom-up with top-down approaches in  
549 ongoing 4D nucleome research, aimed at a comprehensive understanding of the structure-  
550 function relationships in complex biological systems.

551 We propose that microscopically defined ANC/INC compartments and A/B  
552 compartments, detected by ensemble Hi-C, represent the same functional compartments.  
553 Chromatin that contributes to the ANC and compartment A, respectively, is gene rich,  
554 transcriptionally active and typically located preferentially in the interior of mammalian cell  
555 nuclei, whereas both the INC and compartment B comprise gene poor, transcriptionally  
556 repressed chromatin of higher compaction, which is more prominent at the nuclear periphery  
557 (for review see <sup>20,47</sup>). We further propose to equate microscopically defined chromatin domains  
558 (CDs) / RDs comprising several 100 kb (see below) that constitute functional building blocks

559 of the ANC and INC with similarly sized compartment domains (see Supplementary Table 1)  
560 as functional building blocks of A and B compartments rather than with TADs <sup>48-50</sup>. A  
561 correspondence of microscopically discernible RDs with TADs mapped by ensemble Hi-C has  
562 been favored in some studies <sup>49,50</sup>

563 TADs represent genomic regions between several 100 kb up to >1 Mb in length, where  
564 DNA sequences physically interact with each other more frequently compared to sequences  
565 outside a given TAD <sup>47,51-53</sup>. TADs, however, do not represent an individual chromatin structure,  
566 but a statistical feature of a cell population. Boundaries detected in Hi-C experiments are noted  
567 as transition points between TAD-triangles. They constrain, but do not restrict completely the  
568 operating range of regulatory sequences <sup>54</sup>. Recently, super-resolution microscopy  
569 demonstrated the presence of TAD-like domains at the single-cell level <sup>55</sup>. In cohesin depleted  
570 cells, a more stochastic placement of borders between TAD-like domains was detected <sup>56</sup>. A  
571 role of IC-channels as additional structural boundaries between CDs and CDCs located on  
572 both sides, has been considered but not proven <sup>19</sup>.

573 Early microscopic studies of the replicating genome during S-phase provided a first  
574 opportunity to explore its genome wide partitioning into discrete structural entities with a DNA  
575 content of ~1 Mb, called replication domains (RD) or foci <sup>57,58</sup>. We adopted the term ~1 Mb  
576 chromatin domains in line with evidence that RDs persist as similarly sized stable chromatin  
577 units throughout interphase and during subsequent cell cycles <sup>35,36</sup>. Later studies assigned an  
578 average DNA content of 400–800 kb to RDs/CDs <sup>18</sup>, which can be optically resolved down to  
579 clusters of a few single replicons (150–200 kb) <sup>37,59</sup>. Gene rich, early replicating domains form  
580 the A compartment, gene poor, later replicating domains the B compartment <sup>18</sup>.

581 Our study confirms previous reports, which showed the maintenance of pulse-labeled  
582 RDs and the formation of S-phase specific replication patterns in cohesin depleted, pre-mitotic  
583 interphase cells <sup>30,38</sup>. In addition, our study demonstrates the ability to re-constitute RDs in a  
584 typical pattern arrangement in post-endomitotic MLN. Moreover, MLN were able to initiate a  
585 new round of DNA replication with the formation of typical stage specific replication patterns  
586 under continued absence of cohesin.



587           These observations, however, do not imply that cohesin would be dispensable for RD  
588 structure. A comparison of numbers (counts) and volumes of individual RDs generated in early  
589 S-phase in nuclei of control cells and cells treated with auxin for 6 and 30 h respectively  
590 resulted in a significant increase both of RD numbers and RD volumes and also in a remarkably  
591 increased heterogeneity of these parameters after cohesin depletion. The near double amount  
592 of RD numbers in MLN (30h auxin) compared to controls was expected since MLN are  
593 generated as a result of an endomitosis with full separation of sister chromatids harboring RDs  
594 where labeled nucleotides were incorporated into both newly synthesized DNA strands in the  
595 previous cell cycle. In cohesin depleted cells treated with auxin after RL for 6h the increase of  
596 discernible RDs may result from an enhanced untethering of labeled sister chromatids  
597 compared to controls. At the time of fixation, both controls and cohesin depleted cells had likely  
598 reached the late S or G2-phase and labeled RDs had formed two separate sister chromatids  
599 within a given CT. Sister chromatids are kept together by cohesin at some sites, but are  
600 untethered at other sites and can dissociate from each up to few hundred nm<sup>61</sup>. In cohesin  
601 depleted nuclei these untethered sites are likely increased. An increase of RD counts based  
602 on RD splitting should correspond with a decrease of RD volumes. Unexpectedly, we observed  
603 a remarkable volume increase in individual segmented RDs. This observation supports a role  
604 of cohesin in the compaction of chromatin structures exerted by chromatin loop extrusion <sup>21</sup>  
605 which could affect contact frequencies and thus explain at least in part the loss of TAD patterns  
606 in ensemble Hi-C experiments. Due to the resolution limit of 3D-SIM (~120 nm lateral / 300 nm  
607 axial) these results must be viewed with caution: a fraction of RDs with sizes below this limit  
608 would show a putative size reflecting the diffraction limit, resulting in an overestimate of their  
609 volumes. To overcome these method-inherent limitations, imaging approaches with higher  
610 resolution, such as STORM/SMLM or STED are required to further clarify the influence of  
611 cohesin on RD structure <sup>60,61</sup>. The increased heterogeneity of RDs volumes in cohesin depleted  
612 nuclei compared with controls, likely reflects the cell-to-cell shift of boundaries described for  
613 TAD-like domains in cohesin depleted cells <sup>56</sup>. In summary, we tentatively conclude that  
614 cohesin plays an indispensable role for the structure of RDs/CDs but is dispensable for the  
615 formation of a compartmentalized nuclear organization. The current study may help to

616 stimulate integrated research strategies with the goal to better understand the structure-  
617 function implications of the nuclear landscape.

618 New methods of super-resolved optical reconstruction of chromatin organization with  
619 oligopaints technology<sup>55</sup> or the combination of serial block-face scanning electron microscopy  
620 with in situ hybridization (3D-EMISH)<sup>62</sup> have opened up new ways to explore the geometrical  
621 variability of TAD-like structures in comparison with TADs identified by ensemble Hi-C and to  
622 close current gaps of knowledge on nuclear compartmentalization. Despite compelling  
623 evidence for chromatin loops, their actual 3D and 4D (space-time) organization is not known.  
624 Microscopic evidence for the formation of higher order chromatin arrangements based on  
625 nucleosome clutches or nanodomains<sup>30,55,56,63,64</sup> suggests that loops may be organized as  
626 much more compact structures with the potential implication that the diffusion of individual  
627 macromolecules into their interior may be constrained and the penetration of macromolecular  
628 aggregates is fully excluded<sup>33</sup>. As a consequence, transcription and other nuclear functions  
629 may preferentially occur at the surface of chromatin clusters, dynamically remodeled to fulfill  
630 this condition. How dynamic changes of functionally defined higher order chromatin structures  
631 in space and time are related to changing functional requirements of cells at different levels of  
632 a hierarchical chromatin organization, defines major challenges for future studies. Such studies  
633 should also advance our still incomplete knowledge of cohesin functions.

634

## 635 **Materials & Methods**

### 636 *Cells and culture conditions*

637 HCT116-RAD21-mAID-mClover cells (referred to as HCT116-RAD21-mAC cells in the  
638 manuscript) were generated and kindly provided by the Kanemaki lab (Mishima Shizuoka,  
639 Japan; <sup>14</sup>). For a detailed description see Supplementary Fig. 1. Cells were cultured in McCoy's  
640 5A medium supplemented with 10% FBS, 2 mM L-glutamine, 100 U/ml penicillin, and 100  
641 µg/ml streptomycin at 37°C in 5% CO<sub>2</sub>. For data shown in Supplementary Fig. 2B HCT116-  
642 RAD21-mAC cells and HCT-116 wild type cells were grown in in DMEM medium supplemented  
643 with 10% FCS, 2 mM L-glutamine, 50 µg/ml gentamicin. Cells were tested for mycoplasma  
644 contamination by confocal microscopy.

645

### 646 *Auxin induced RAD21 proteolysis*

647 Degradation of AID-tagged RAD21 was induced by addition of auxin (indole-3-acetic acid; IAA,

648 Sigma Aldrich) to the medium at a final concentration of 500  $\mu$ M (auxin stock solution 2 M in  
649 DMSO). In long term cultures fresh auxin-medium was added after ~18h.

650

### 651 *Immunodetection*

652 Immunodetection of cohesin subunits RAD21, SMC1 and SMC3 was performed on cells grown  
653 to 80% confluency on high precision coverslips with respective antibodies all raised in rabbit  
654 (Abcam (RAD21), Bethyl laboratories (SMC1, SMC3)), detected with Cy3-conjugated goat anti  
655 rabbit antibodies (Dianova). Primary antibodies against SC35 (Sigma), RNA Pol II (Abcam)  
656 and H3K27me3 (Active Motif) were detected with either donkey anti-mouse Alexa 488 (Life  
657 technologies) or donkey-anti rabbit Alexa 594 (Life technologies). To meet the requirements  
658 for super-resolution microscopy with respect to an optimal signal-to-noise ratio and  
659 preservation of 3D chromatin structure, a protocol described in detail in <sup>65</sup> was followed. Cells  
660 were counterstained in 1  $\mu$ g/ml DAPI and mounted in antifade mounting medium (Vectashield  
661 (Vector Laboratories)).

| <b>Antibodies</b>            | <b>Source</b>       | <b>Catalog number</b> |
|------------------------------|---------------------|-----------------------|
| RAD21                        | Abcam               | ab154769              |
| SMC1                         | Bethyl laboratories | A300-055A             |
| SMC3                         | Bethyl laboratories | A300-060A             |
| Goat anti rabbit Cy3         | Dianova             | 111-165-045           |
| Mouse anti SC35              | Sigma               | S4045                 |
| Mouse anti RNA Pol II Ser5P  | Abcam               | ab5408                |
| Rabbit anti H3K27me3         | Active Motif        | 39155                 |
| Donkey anti mouse Alexa 488  | Life technologies   | A21202                |
| Donkey anti rabbit Alexa 594 | Life technologies   | A21207                |

662

663

### 664 *Replication pulse labeling (RL)*

665 *1. by replication scratch labeling:* Cells cultivated on high precision coverslips (thickness 0.170  
666 mm) grown to 50-80% confluency were transferred into a dry empty tissue dish after draining  
667 off excess medium. 30  $\mu$ l of the prewarmed labeling solution containing 20  $\mu$ M Cy3-dUTP  
668 (homemade) or Alexa 594-5-dUTP (Life technologies) was evenly distributed over the  
669 coverslip. With the tip of a hypodermic needle parallel scratches at distances of ~100  $\mu$ m were  
670 quickly applied to the cell layer. Cells were incubated for 1 min in the incubator, then a few ml  
671 of pre-warmed medium was added to the dish. After 30min medium was exchanged to remove  
672 non-incorporated nucleotides (for details see <sup>36</sup>). This procedure preserves the RAD21-  
673 mClover fluorescence after labeling.

674 *2. by incorporation of 5-Ethynyl-dU (EdU) and detection via „click chemistry“*

675 This approach was used for RL in MLN after 30h auxin treatment (compare Fig. 6E) since  
676 these cells are prone to detachment upon scratching. EdU was added at a final concentration  
677 of 10  $\mu$ M to the medium for 15min. Incorporated EdU was detected according to manufactures  
678 instructions (baseclick) by a Cu(I) catalyzed cycloaddition reaction that covalently attaches a  
679 fluorescent dye containing a reactive azide group to the ethynyl-group of the nucleotide<sup>66</sup>. For  
680 visualization of RDs, the dye 6-FAM-Azide (baseclick) at a final concentration of 20  $\mu$ M was  
681 used.

682 After either labeling approach cells were washed in 1xPBS, fixed with 4% formaldehyde / PBS  
683 for 10 min and permeabilized with 0.5% Triton X-100/PBS/Tween 0.02% for 10 min. Cells were  
684 counterstained in 1  $\mu$ g/ml DAPI and mounted in antifade mounting medium (Vectashield  
685 (Vector Laboratories); for details, see<sup>65</sup>).

686

#### 687 *Hi-C in situ analysis of untreated and auxin treated cells*

688 HCT-116-RAD21-mAC cells were plated in 6-well plates with either complete media, or  
689 complete media with 500  $\mu$ M auxin (IAA) for 6h (as in<sup>15</sup>) or 28h (to enrich for post-mitotic cells  
690 with multilobulated nuclei). Cells were crosslinked with 1% formaldehyde directly on the plate  
691 for 10 minutes and then quenched with glycine. The crosslinked cells were then scraped off  
692 and *in situ* Hi-C was performed as in [14]. In brief, cells were permeabilized with nuclei intact,  
693 the DNA was digested overnight with Mbol, the 5'-overhangs were filled in while incorporating  
694 bio-dUTP, and the resulting blunt end fragments were ligated together. Crosslinks were then  
695 reversed overnight, the DNA was sheared to 300-500 bp for Illumina sequencing, biotinylated  
696 ligation junctions were captured using streptavidin beads and then prepped for Illumina  
697 sequencing. We prepared 3 libraries (two biological replicates) each for each time point  
698 (untreated 6 hours, treated 6 hours, untreated 28 hours, treated 28 hours). All Hi-C data was  
699 processed using Juicer<sup>67,68</sup>. The data was aligned against the hg19 reference genome. All  
700 contact matrices used for further analysis were KR-normalized with Juicer. Comparison of  
701 compartment strengthening to histone modification clusters was done as in<sup>15</sup>. Histone  
702 modification data for 9 marks (H3K36me3, H3K27Ac, H3K4me1, H4K16Ac, H3K79me2,  
703 H2AZ, H4K20me3, H3K27me3, H3K9me3) generated from untreated and 6-hour treated cells  
704 in<sup>15</sup> was grouped into 6 clusters using k-means clustering. For the k-means clustering, the  
705 histone modification data was first converted into a z-score value for each mark in order to  
706 account for differences in the dynamic range between marks.

707

#### 708 *Repli-Seq of untreated or auxin-treated cells*

709 HCT116-RAD21-mAC cells were synchronized in G1 with lovastatin as previously described  
710<sup>69</sup>. Briefly, cells were incubated with 20  $\mu$ M Lovastatin (Mevinolin) (LKT Laboratories M1687)  
711 for 24 hours to synchronize in G1. 500  $\mu$ M auxin or DMSO was added 6 hours before release  
712 from lovastatin block. To release from G1 block, lovastatin was washed away with 3 washes

713 of PBS and warm media plus 2 mM Mevalonic acid (Sigma-Aldrich M4667) and 500  $\mu$  M auxin  
714 or DMSO. Cells were released for 10, 14, 18, and 22 hours. 2 hours before the time point 100  
715  $\mu$  M BrdU was added to label nascent replication. After fixation, equal numbers of cells from  
716 each release time point were pooled together for early/late repli-seq processing<sup>17</sup>. Repli-Seq  
717 data was processed as described in<sup>17</sup>. In brief, data was aligned to the hg19 reference genome  
718 using bowtie2, deduplicated with samtools, and the log-2 ratio between early and late  
719 timepoints was calculated.

720

### 721 *3D DNA-FISH*

722 Labeled chromosome painting probes delineating human chromosomes 4-(BIO), 12-(DIG) and  
723 19-Cy3 were used. 30 ng of each labeled probe and a 20-fold excess of COT-1 DNA was  
724 dissolved per 1  $\mu$ l hybridization mix (50% formamide/ 2xSSC/ 10% dextran sulfate).

725 Cells were fixed with 4% formaldehyde/PBS for 10 min. After a stepwise exchange with 0.5%  
726 Triton X-100/PBS, cells were permeabilized with 0.5% Triton X-100/PBS for 10 min. Further  
727 pretreatment steps included incubation in 20% glycerol (1h), several freezing/thawing steps in  
728 liquid N<sub>2</sub>, incubation in 0.1 N HCl (5 min) and subsequent storage in 50% formamide/2xSSC  
729 overnight. After simultaneous denaturation of probe and cells (2 min at 76°C), hybridization  
730 was performed at 37°C for 48h. After stringent washing in 0.1xSSC at 60°C, biotin was  
731 detected by streptavidin-Alexa 488 and DIG by a mouse-anti-DIG antibody conjugated to Cy5.  
732 Cells were counterstained in 1  $\mu$ g/ml DAPI, and mounted in antifade mounting medium  
733 Vectashield (Vector Laboratories), (for a detailed protocol see<sup>22</sup>).

734

### 735 *DNA halo preparation*

736 Cells were incubated for 6h in 500  $\mu$ M auxin for cohesin depletion. DNA halo preparation was  
737 largely performed according to<sup>70</sup>. After washing the cells in 1xPBS they were incubated for 10  
738 min in a buffer at 4°C containing 10 mM Tris pH 8, 3 mM MgCl<sub>2</sub>, 0.1 M NaCl, 0.3 M sucrose,  
739 protease inhibitors (freshly added to the buffer prior to use) 1  $\mu$ M pepstatin A, 10  $\mu$ M E64, 1  
740 mM AEBSF and 0.5% Nonidet P40. All the following procedures were performed at room  
741 temperature. Subsequently, DNA was stained for 4 min with 2  $\mu$ g/ml DAPI. After 1 min in a  
742 second extraction buffer (25 mM Tris pH 8, 0.5 M NaCl, 0.2 mM MgCl<sub>2</sub>; protease inhibitors as  
743 in nuclei buffer and 1 mM PMSF were added fresh prior to use), cells were incubated 4 min in  
744 halo buffer (10 mM Tris pH 8, 2 M NaCl, 10 mM EDTA; protease inhibitors as in nuclei buffer  
745 and 1 mM DTT were added fresh prior to use). Finally, cells were washed 1 min each in two  
746 washing buffers (25 mM Tris pH 8, 0.2 mM MgCl<sub>2</sub>; the first buffer with and the second without  
747 0.2 M NaCl). After 10 min fixation in 4% formaldehyde/PBS, cells were washed twice in 1xPBS  
748 and mounted on slides with Vectashield. Nuclear scaffolds and the faded DNA halos were  
749 imaged at a widefield microscope (Zeiss Axioplan 2, 100x/1.30 NA Plan-Neofluar Oil Ph3  
750 objective; Axiovision software; AxioCam mRM camera). Both the total area (At) and the

751 scaffold area ( $A_s$ ) of each cell were manually segmented using the software Fiji and the DNA  
752 halo area ( $A_h$ ) calculated as a subtraction of the two ( $A_h = A_t - A_s$ ). The DNA halo radius was  
753 subsequently derived with the formula  $R = \sqrt{(A_h/\pi)}$ . Four biological replicates were prepared  
754 and measured. For generation of plots and statistical analysis (Wilcoxon test) the software  
755 RStudio was used.

756

#### 757 *Confocal fluorescence microscopy*

758 Confocal images were collected using a Leica SP8 confocal microscope equipped with a  
759 405nm excitation laser and a white light laser in combination with an acousto-optical beam  
760 splitter (AOBS). The used confocal system has three different detectors, one photomultiplier  
761 tube (PMT) and two hybrid photodetectors (HyD). The microscope was controlled by software  
762 from Leica (Leica Application Suite X, ver. 3.5.2.18963). For excitation of DAPI, the 405 nm  
763 laser was used, for excitation of Alexa488, Cy3, STAR635P and Cy5, the white light laser was  
764 set to 499, 554, 633 and 649 nm, respectively. The emission signal of DAPI was collected by  
765 the PMT (412-512 nm), the emission signals of Alexa488 (506-558 nm), Cy3 (561-661 nm),  
766 STAR635P (640-750 nm) and Cy5 (656-780 nm) were collected by the two HyD detectors.  
767 Images were acquired with 42 nm pixel steps, 102  $\mu$ s pixel dwell time and 2-fold line  
768 accumulation using a Leica HC PL APO 63x/1.30 NA Glycerol immersion objective. The frame  
769 size was 37 x 37  $\mu$ m and the scan speed was 700 Hz. The size of the confocal pinhole was 1  
770 A.U. Confocal image z-stacks were acquired with a step size of 330 nm.

771

#### 772 *Live cell microscopy for long term observations*

773 For live cell imaging, cells were plated on poly-L-Lysine-coated glass bottom 2-well imaging  
774 slides (ibidi), allowing to image control and auxin-treated conditions in parallel. For DNA  
775 staining cells were incubated in media containing 500 nM SiR-DNA (Spirochrome) for 1h  
776 before imaging. Timelapse acquisitions were carried out on a Nikon TiE microscope equipped  
777 with a Yokogawa CSU-W1 spinning disk confocal unit (50  $\mu$ m pinhole size), an Andor Borealis  
778 illumination unit, Andor ALC600 laser beam combiner (405 nm / 488 nm / 561 nm / 640 nm),  
779 and Andor IXON 888 Ultra EMCCD camera. The microscope was controlled by software from  
780 Nikon (NIS Elements, ver. 5.02.00). Cells were imaged in an environmental chamber  
781 maintained at 37°C with 5% CO<sub>2</sub> (Oko Labs), using a Nikon PlanApo 60x/1.49 NA oil  
782 immersion objective and a Perfect Focus System (Nikon). Images were recorded every 15 min  
783 for 21h as z-stacks with two planes and a step size of 6  $\mu$ m, unbinned and with a pixel size of  
784 217 nm. For excitation of mClover and SiR-DNA, the 488 and 640 nm laser lines were used,  
785 respectively. Fiji software (ImageJ 1.51j)<sup>71</sup> was used to analyze images.

786

#### 787 *Quantitation of auxin induced RAD21-mAID-mClover degradation on single cells*

788 *1. in fixed cells:* HCT-116-RAD21-mAC and HCT-116 wild type cells were treated with 500  $\mu$ M  
789 auxin for 6h, fixed in 3.7% formaldehyde, permeabilized with 0.7% Triton X-100 for 15 min,  
790 counterstained with 1  $\mu$ g/ml DAPI for 10 min and mounted in Vectashield mounting medium  
791 (Vector Laboratories). High-throughput imaging of single cells was performed at the wide-field  
792 microscope Operetta (40x/0.95 NA air objective; Harmony software; Jenoptik firecamj203  
793 camera). The high-content images were analyzed on batch through a pipeline created with the  
794 Harmony software and nuclei identified based on DAPI signal. The nuclei found on the border  
795 of each field were removed and the remaining nuclei were selected based on morphology  
796 parameters, such as size and roundness. mClover intensities were then measured within the  
797 nuclear mask of the selected nuclei. The fluorescence intensities data were exported into  
798 tables and processed in RStudio to produce plots and statistical analysis. For each treatment,  
799 the measurements were combined from 3 biological experiments, each made of 2 technical  
800 replicates. mClover intensities measured from HCT-116 wild type cells were used as an  
801 estimate for the background level. A median of 10 A. U. (arbitrary units) was calculated for the  
802 nuclear mClover intensity in wild type cells (10.23 and 10.56 A. U. in the untreated and in the  
803 auxin treated wild type cells, respectively). This background value was subtracted from all  
804 values measured for the untreated and auxin-treated HCT-116-RAD21-mAC cells.

805 *2. in time lapse acquisitions:* Nikon spinning disk confocal live cell time lapses were acquired  
806 as described above. For the analysis the lower of the two planes showing interphase cells was  
807 used. The detailed description of segmentation and analysis scripts can be found as comments  
808 in the scripts which are deposited on GitHub ([https://github.com/CALM-](https://github.com/CALM-LMU/Cohesin_project.git)  
809 [LMU/Cohesin\\_project.git](https://github.com/CALM-LMU/Cohesin_project.git)). In brief, segmentation maps for nuclei in the SiR-DNA channel in  
810 confocal time lapses were obtained by a machine learning based pixel classification using  
811 Ilastik (standard settings). Segmentation maps were manually curated in order to analyze only  
812 individual nuclei. Nuclei were traced starting at time frame 1 until the cell entered mitosis and  
813 disappeared from the lower imaging plane. The generated segmentation maps were used to  
814 select single nuclei in the mClover channel. After background subtraction (modal gray value)  
815 the median intensity was measured for each labeled cell over time using Fiji. Only cells with a  
816 mClover intensity above 50 counts were included in the analysis. All data shown are  
817 normalized to their starting values. Cells surpassing a fluctuation above the 90 % quantile  
818 relative to their own rolling mean of 5 timepoints were filtered out. Plots were generated using  
819 Python.

820

821 *DNA content assessment in individual nuclei by integrated DAPI intensity measurement*

822 *DAPI stained nuclei* were acquired using the Nikon spinning disk system described above.  
823 Fixed samples of untreated control cells and cells treated with auxin for 30h were acquired as  
824 confocal image z-stacks in 35 planes with a step size of 300 nm using a Nikon PlanApo  
825 100x/1.45 NA oil immersion objective. DAPI was excited with the 405 nm laser line.

826 Segmentation and analysis scripts are described in detail in the scripts which are uploaded on  
827 GitHub ([https://github.com/CALM-LMU/Cohesin\\_project.git](https://github.com/CALM-LMU/Cohesin_project.git)). In brief, spinning disk confocal  
828 stacks of DAPI stained nuclei were used for a machine learning based pixel classification to  
829 obtain 3D segmentation maps of nuclei using Ilastik (standard settings). Segmentation maps  
830 were manually curated in order to analyze only individual non touching nuclei. After  
831 background subtraction (modal gray value) the integrated intensity was measured for each  
832 segmented DAPI stained nucleus by using Fiji. Plots were generated using R Studio.

833

#### 834 *Semi-automatic quantification of multilobulated nuclei (MLN) and mitoses*

835 Image acquisitions were carried out on the Nikon spinning disk system described above. Using  
836 a Nikon PlanApo 100x/1.45 NA oil immersion objective tiled images (3x3 with 5% overlap and  
837 131 nm pixel size) were acquired for each condition to increase the number of cells per field  
838 of view. Confocal image z-stacks were acquired in two planes with a step size of 6  $\mu\text{m}$  in order  
839 to encompass cells, in particular mitotic cells, in different plane levels. DAPI and mClover were  
840 excited with 405 or 488 nm laser lines, respectively. All nuclei from each image (average 280  
841 nuclei per image frame) were classified visually into morphologically normal nuclei, mitoses  
842 and multilobulated nuclei (MLN). In auxin treated cells nuclei with persistent RAD21-mClover  
843 fluorescence ( $\sim 2\%$ ) were excluded.

844

#### 845 *Structured illumination microscopy (SIM)*

846 Super-resolution structured illumination imaging was performed on a DeltaVision OMX V3  
847 system (Applied Precision Imaging/GE Healthcare) equipped with a 100x/1.4 NA UPlan S Apo  
848 oil immersion objective (Olympus), Cascade II:512 EMCCD cameras (Photometrics) and 405,  
849 488 and 593 nm lasers (for detailed description, see <sup>72</sup>). For sample acquisition oil with a  
850 refractive index of  $RI=1.512$  was used. 3D image stacks were acquired with 15 raw images per  
851 plane (5 phases, 3 angles) and an axial distance of 125 nm and then computationally  
852 reconstructed (Wiener filter setting of 0.002, channel specific optical transfer functions (OTFs))  
853 and color shift corrected using the SoftWoRx software (Applied Precision Imaging/GE  
854 Healthcare). After establishing 32-bit composite tiff stacks with a custom-made macro in  
855 Fiji/ImageJ2 (<http://rsb.info.nih.gov/ij/>), the data were subsequently aligned again to get a  
856 higher alignment precision. These images were then used for measurements in the Volocity  
857 software (Perkin Elmer).

858

#### 859 *Nuclear volume measurements*

860 Volume measurements were done with the Volocity software (Version 6.1.2.). RGB image  
861 stacks were separated in their respective channels and then nuclei structures were obtained  
862 and segmented for volume measurements by using the following commands: 1. "Find Objects"  
863 (Threshold using: Automatic, Minimum object size: 200  $\mu\text{m}^3$ ), 2. "Dilate" (number of iterations:



864 15), 3. “Fill Holes in Objects” and 4. “Erode” (number of iterations: 15). In  $\approx 5\%$  of cases we  
865 had to adjust these settings for the challenging task of nuclei segmentation. To confirm  
866 statistically significance of volume differences the Mann-Whitney test was applied.

867

#### 868 *Segmentation and quantification of replication domain (RD) signals*

869 Aligned 3D SIM image stacks were used as RGB for object counting and volume  
870 measurements in the Volocity software. For each series between  $n=7$  and  $n=11$  nuclei were  
871 measured resulting in 31.000 – 55.000 single values for each series. Image stacks were  
872 separated into their respective channels. The segmentation of RD structures was performed  
873 with the following software commands: 1. “Find Objects” (Threshold using: Intensity, Lower:  
874 32, Upper: 255), 2. “Separate Touching Objects” (Object size guide of  $0,002 \mu\text{m}^3$ ) and 3.  
875 “Exclude Objects by Size”, excluding structures  $< 0,005 \mu\text{m}^3$ . This cut-off level largely  
876 corresponds to the resolution limit of 3D-SIM ( $\sim 120$  nm lateral /  $300$  nm axial). Exclusion of  
877 signals outside a selected nucleus was achieved by the commands “Intersect” and  
878 “Compartmentalize”. Segmentation of nuclei was realized by the following commands: 1. “Find  
879 Objects” (Threshold using: Intensity), 2. “Dilate”, 3. “Fill Holes in Objects” and 4. “Erode”.  
880 Measured values of individual object counts and segmented RD volumes were displayed as  
881 boxplots indicating the median with 25%-75% quartiles. To test for statistical significance a Mann-  
882 Whitney test was applied. R studio was used for generation of plots and statistical tests.

883

#### 884 *3D assessment of DAPI intensity classes as proxy for chromatin compaction classification*

885 Nuclei voxels were identified automatically from the DAPI channel intensities using Gaussian  
886 filtering and automatic threshold determination. For chromatin quantification a 3D mask was  
887 generated in ImageJ to define the nuclear space considered for the segmentation of DAPI  
888 signals into seven classes with equal intensity variance by a previously described in house  
889 algorithm<sup>29</sup>, available on request. Briefly, a hidden Markov random field model classification  
890 was used, combining a finite Gaussian mixture model with a spatial model (Potts model),  
891 implemented in the statistics software R<sup>73,74</sup>. This approach allows threshold-independent  
892 signal intensity classification at the voxel level, based on the intensity of an individual voxel.  
893 Color or gray value heat maps of the seven intensity classes in individual nuclei were  
894 performed in ImageJ.

895

#### 896 *Quantitative allocation of defined nuclear targets on 3D chromatin compaction classes*

897 Individual voxels of fluorescent signals of the respective marker channels were segmented by  
898 a semi-automatic thresholding algorithm (accessible in VJ Schmid (2020). nucim: Nucleome  
899 Imaging Toolbox. R package version 1.0.9. <https://bioimaginggroup.github.io/nucim/>  
900 XYZ-coordinates of segmented voxels were mapped to the seven DNA intensity classes. The  
901 relative frequency of intensity weighted signals mapped on each DAPI intensity class was used

902 to calculate the relative distribution of signals over chromatin classes. For each studied nucleus  
903 the total number of voxels counted for each intensity class and the total number of voxels  
904 identified for the respective fluorescent signals for SC35, RNA Pol II, H3K27me3 was set to 1.  
905 As an estimate of over/under representations (relative depletion/enrichment) of marker signals  
906 in the respective intensity classes, we calculated the difference between the percentage points  
907 obtained for the fraction of voxels for a given DAPI intensity class and the corresponding  
908 fraction of voxels calculated for the respective signals. Calculations were performed on single  
909 cell level and average values over all nuclei used for evaluation and plotting. For a detailed  
910 description, see <sup>29</sup>.

911

### 912 *Statistics*

913 Microscopic observations were verified from at least two independent series. For highly  
914 elaborate quantitative 3D analyses of super-resolved image stacks we selected between 4 and  
915 39 nuclei for a given experiment with the only precondition of a high staining and structure-  
916 preserving quality. Data shown in Figs. 3, 4, 8, Supplementary Figs. 2 and 9 comprise merged  
917 data from different series, with links to data on individual experiments. Investigators were not  
918 blinded during the experiments and when assessing the outcome. Significance levels were  
919 tested by a non-parametric Wilcoxon test and a Bonferroni-Holm correction was used to avoid  
920 errors through multiple testing (see *Supplementary\_Table\_3*). The error bars represent the  
921 standard error of the mean. The variance was similar between the groups that were statistically  
922 compared.

923

### 924 *Data availability*

925 Raw data used for Figs. 1-4, 6, 8, suppl. Figs. 2-7,9, additional „biological replicates” and  
926 complementary experiments can be accessed under  
927 <https://cloud.bio.lmu.de/index.php/s/rZxxkgYExonWLgy>.

928 Processed Hi-C and Repli-Seq data used in this study can be accessed under:

929 <https://www.dropbox.com/sh/y2w0xipwso9kgma/AAC2OihQJdlIrrzqBBPX0zPcxa?dl=0>

930 with GEO accession: GSE145099 and enter token cxmzqaeqzdefhsj into the box. Publicly  
931 available CHIP-Seq data used in this study are available at GEO accession: GSE104888.

932

### 933 **References**

- 934 1 Davidson, I. F. *et al.* DNA loop extrusion by human cohesin. *Science* **366**, 1338-1345,  
935 doi:10.1126/science.aaz3418 (2019).
- 936 2 Parelho, V. *et al.* Cohesins functionally associate with CTCF on mammalian chromosome arms.  
937 *Cell* **132**, 422-433, doi:10.1016/j.cell.2008.01.011 (2008).
- 938 3 Rao, S. S. *et al.* A 3D map of the human genome at kilobase resolution reveals principles of  
939 chromatin looping. *Cell* **159**, 1665-1680, doi:10.1016/j.cell.2014.11.021 (2014).
- 940 4 Zuin, J. *et al.* Cohesin and CTCF differentially affect chromatin architecture and gene expression  
941 in human cells. *Proc Natl Acad Sci U S A* **111**, 996-1001, doi:10.1073/pnas.1317788111 (2014).

- 942 5 Fudenberg, G. *et al.* Formation of Chromosomal Domains by Loop Extrusion. *Cell Rep* **15**, 2038-  
943 2049, doi:10.1016/j.celrep.2016.04.085 (2016).
- 944 6 Sanborn, A. L. *et al.* Chromatin extrusion explains key features of loop and domain formation in  
945 wild-type and engineered genomes. *Proc Natl Acad Sci U S A* **112**, E6456-6465,  
946 doi:10.1073/pnas.1518552112 (2015).
- 947 7 Jeppsson, K., Kanno, T., Shirahige, K. & Sjogren, C. The maintenance of chromosome  
948 structure: positioning and functioning of SMC complexes. *Nat Rev Mol Cell Biol* **15**, 601-614,  
949 doi:10.1038/nrm3857 (2014).
- 950 8 Mehta, G. D., Kumar, R., Srivastava, S. & Ghosh, S. K. Cohesin: functions beyond sister  
951 chromatid cohesion. *FEBS Lett* **587**, 2299-2312, doi:10.1016/j.febslet.2013.06.035 (2013).
- 952 9 Nishiyama, T. Cohesion and cohesin-dependent chromatin organization. *Curr Opin Cell Biol* **58**,  
953 8-14, doi:10.1016/j.ceb.2018.11.006 (2019).
- 954 10 Peters, J. M., Tedeschi, A. & Schmitz, J. The cohesin complex and its roles in chromosome  
955 biology. *Genes Dev* **22**, 3089-3114, doi:10.1101/gad.1724308 (2008).
- 956 11 van Ruiten, M. S. & Rowland, B. D. SMC Complexes: Universal DNA Looping Machines with  
957 Distinct Regulators. *Trends Genet* **34**, 477-487, doi:10.1016/j.tig.2018.03.003 (2018).
- 958 12 Litwin, I., Pilarczyk, E. & Wysocki, R. The Emerging Role of Cohesin in the DNA Damage  
959 Response. *Genes (Basel)* **9**, doi:10.3390/genes9120581 (2018).
- 960 13 Merckenschlager, M. & Nora, E. P. CTCF and Cohesin in Genome Folding and Transcriptional  
961 Gene Regulation. *Annu Rev Genomics Hum Genet* **17**, 17-43, doi:10.1146/annurev-genom-  
962 083115-022339 (2016).
- 963 14 Natsume, T., Kiyomitsu, T., Saga, Y. & Kanemaki, M. T. Rapid Protein Depletion in Human Cells  
964 by Auxin-Inducible Degron Tagging with Short Homology Donors. *Cell Rep* **15**, 210-218,  
965 doi:10.1016/j.celrep.2016.03.001 (2016).
- 966 15 Rao, S. S. P. *et al.* Cohesin Loss Eliminates All Loop Domains. *Cell* **171**, 305-320 e324,  
967 doi:10.1016/j.cell.2017.09.026 (2017).
- 968 16 Haarhuis, J. H. & Rowland, B. D. Cohesin: building loops, but not compartments. *EMBO J* **36**,  
969 3549-3551, doi:10.15252/embj.201798654 (2017).
- 970 17 Marchal, C. *et al.* Genome-wide analysis of replication timing by next-generation sequencing  
971 with E/L Repli-seq. *Nat Protoc* **13**, 819-839, doi:10.1038/nprot.2017.148 (2018).
- 972 18 Marchal, C., Sima, J. & Gilbert, D. M. Control of DNA replication timing in the 3D genome. *Nat*  
973 *Rev Mol Cell Biol*, doi:10.1038/s41580-019-0162-y (2019).
- 974 19 Cremer, T. *et al.* The Interchromatin Compartment Participates in the Structural and Functional  
975 Organization of the Cell Nucleus. *Bioessays* **42**, e1900132, doi:10.1002/bies.201900132  
976 (2020).
- 977 20 Cremer, T. *et al.* The 4D nucleome: Evidence for a dynamic nuclear landscape based on co-  
978 aligned active and inactive nuclear compartments. *FEBS Lett* **589**, 2931-2943,  
979 doi:10.1016/j.febslet.2015.05.037 (2015).
- 980 21 Kim, Y., Shi, Z., Zhang, H., Finkelstein, I. J. & Yu, H. Human cohesin compacts DNA by loop  
981 extrusion. *Science* **366**, 1345-1349, doi:10.1126/science.aaz4475 (2019).
- 982 22 Cremer, M. *et al.* Multicolor 3D fluorescence in situ hybridization for imaging interphase  
983 chromosomes. *Methods Mol Biol* **463**, 205-239, doi:10.1007/978-1-59745-406-3\_15 (2008).
- 984 23 Jevtic, P., Edens, L. J., Vukovic, L. D. & Levy, D. L. Sizing and shaping the nucleus: mechanisms  
985 and significance. *Curr Opin Cell Biol* **28**, 16-27, doi:10.1016/j.ceb.2014.01.003 (2014).
- 986 24 Shu, Z., Row, S. & Deng, W. M. Endoreplication: The Good, the Bad, and the Ugly. *Trends Cell*  
987 *Biol* **28**, 465-474, doi:10.1016/j.tcb.2018.02.006 (2018).
- 988 25 Langer, S., Geigl, J. B., Ehnlé, S., Gangnus, R. & Speicher, M. R. Live cell catapulting and  
989 recultivation does not change the karyotype of HCT116 tumor cells. *Cancer Genet Cytogenet*  
990 **161**, 174-177, doi:10.1016/j.cancergencyto.2005.01.013 (2005).
- 991 26 Lin, S., Coutinho-Mansfield, G., Wang, D., Pandit, S. & Fu, X. D. The splicing factor SC35 has  
992 an active role in transcriptional elongation. *Nat Struct Mol Biol* **15**, 819-826, doi:nsmb.1461  
993 [pii]10.1038/nsmb.1461 (2008).
- 994 27 Egloff, S. & Murphy, S. Cracking the RNA polymerase II CTD code. *Trends Genet* **24**, 280-288,  
995 doi:S0168-9525(08)00128-5 [pii]10.1016/j.tig.2008.03.008 (2008).
- 996 28 Zhou, V. W., Goren, A. & Bernstein, B. E. Charting histone modifications and the functional  
997 organization of mammalian genomes. *Nat Rev Genet* **12**, 7-18, doi:nrg2905  
998 [pii]10.1038/nrg2905 (2011).
- 999 29 Schmid, V. J., Cremer, M. & Cremer, T. Quantitative analyses of the 3D nuclear landscape  
1000 recorded with super-resolved fluorescence microscopy. *Methods* **123**, 33-46,  
1001 doi:10.1016/j.ymeth.2017.03.013 (2017).
- 1002 30 Miron, E. *et al.* Chromatin arranges in chains of mesoscale domains with nanoscale functional  
1003 topography independent of cohesin. *bioRxiv*566638, doi:doi.org/10.1101/566638 (2020).

- 1004 31 Schermelleh, L. *et al.* Subdiffraction multicolor imaging of the nuclear periphery with 3D  
1005 structured illumination microscopy. *Science* **320**, 1332-1336, doi:10.1126/science.1156947  
1006 (2008).
- 1007 32 Smeets, D. *et al.* Three-dimensional super-resolution microscopy of the inactive X chromosome  
1008 territory reveals a collapse of its active nuclear compartment harboring distinct Xist RNA foci.  
1009 *Epigenetics Chromatin* **7**, 8, doi:10.1186/1756-8935-7-8 (2014).
- 1010 33 Maeshima, K. *et al.* The physical size of transcription factors is key to transcriptional regulation  
1011 in chromatin domains. *J Phys Condens Matter* **27**, 064116, doi:10.1088/0953-  
1012 8984/27/6/064116 (2015).
- 1013 34 Dimitrova, D. S. & Berezney, R. The spatio-temporal organization of DNA replication sites is  
1014 identical in primary, immortalized and transformed mammalian cells. *J Cell Sci* **115**, 4037-4051  
1015 (2002).
- 1016 35 Jackson, D. A. & Pombo, A. Replicon clusters are stable units of chromosome structure:  
1017 evidence that nuclear organization contributes to the efficient activation and propagation of S  
1018 phase in human cells. *J Cell Biol* **140**, 1285-1295 (1998).
- 1019 36 Schermelleh, L., Solovei, I., Zink, D. & Cremer, T. Two-color fluorescence labeling of early and  
1020 mid-to-late replicating chromatin in living cells. *Chromosome Res* **9**, 77-80 (2001).
- 1021 37 Xiang, W. *et al.* Correlative live and super-resolution imaging reveals the dynamic structure of  
1022 replication domains. *J Cell Biol* **217**, 1973-1984, doi:10.1083/jcb.201709074 (2018).
- 1023 38 Oldach, P. & Nieduszynski, C. A. Cohesin-Mediated Genome Architecture Does Not Define  
1024 DNA Replication Timing Domains. *Genes (Basel)* **10**, doi:10.3390/genes10030196 (2019).
- 1025 39 Heng, H. H. *et al.* Chromatin loops are selectively anchored using scaffold/matrix-attachment  
1026 regions. *J Cell Sci* **117**, 999-1008, doi:10.1242/jcs.00976 (2004).
- 1027 40 Diaz-Martinez, L. A. *et al.* Cohesin is needed for bipolar mitosis in human cells. *Cell Cycle* **9**,  
1028 1764-1773, doi:10.4161/cc.9.9.11525 (2010).
- 1029 41 Ovrebø, J. I. & Edgar, B. A. Polyploidy in tissue homeostasis and regeneration. *Development*  
1030 **145**, doi:10.1242/dev.156034 (2018).
- 1031 42 Mazzi, S., Lordier, L., Debili, N., Raslova, H. & Vainchenker, W. Megakaryocyte and  
1032 polyploidization. *Exp Hematol* **57**, 1-13, doi:10.1016/j.exphem.2017.10.001 (2018).
- 1033 43 Chen, J. *et al.* Polyploid Giant Cancer Cells (PGCCs): The Evil Roots of Cancer. *Curr Cancer*  
1034 *Drug Targets* **19**, 360-367, doi:10.2174/1568009618666180703154233 (2019).
- 1035 44 Joos, S. *et al.* Hodgkin's lymphoma cell lines are characterized by frequent aberrations on  
1036 chromosomes 2p and 9p including REL and JAK2. *Int J Cancer* **103**, 489-495,  
1037 doi:10.1002/ijc.10845 (2003).
- 1038 45 Rouquette, J., Cremer, C., Cremer, T. & Fakan, S. Functional nuclear architecture studied by  
1039 microscopy: present and future. *Int Rev Cell Mol Biol* **282**, 1-90, doi:10.1016/S1937-  
1040 6448(10)82001-5 (2010).
- 1041 46 Cremer, T., Cremer, M. & Cremer, C. The 4D Nucleome: Genome Compartmentalization in an  
1042 Evolutionary Context. *Biochemistry (Mosc)* **83**, 313-325, doi:10.1134/S000629791804003X  
1043 (2018).
- 1044 47 Rowley, M. J. & Corces, V. G. Organizational principles of 3D genome architecture. *Nat Rev*  
1045 *Genet* **19**, 789-800, doi:10.1038/s41576-018-0060-8 (2018).
- 1046 48 Zhao, P. A., Rivera-Mulia, J. C. & Gilbert, D. M. Replication Domains: Genome  
1047 Compartmentalization into Functional Replication Units. *Adv Exp Med Biol* **1042**, 229-257,  
1048 doi:10.1007/978-981-10-6955-0\_11 (2017).
- 1049 49 Pope, B. D. *et al.* Topologically associating domains are stable units of replication-timing  
1050 regulation. *Nature* **515**, 402-405, doi:10.1038/nature13986 (2014).
- 1051 50 Moindrot, B. *et al.* 3D chromatin conformation correlates with replication timing and is conserved  
1052 in resting cells. *Nucleic Acids Res* **40**, 9470-9481, doi:10.1093/nar/gks736 (2012).
- 1053 51 Lieberman-Aiden, E. *et al.* Comprehensive mapping of long-range interactions reveals folding  
1054 principles of the human genome. *Science* **326**, 289-293, doi:10.1126/science.1181369 (2009).
- 1055 52 Dixon, J. R. *et al.* Topological domains in mammalian genomes identified by analysis of  
1056 chromatin interactions. *Nature* **485**, 376-380, doi:10.1038/nature11082 (2012).
- 1057 53 Dixon, J. R., Gorkin, D. U. & Ren, B. Chromatin Domains: The Unit of Chromosome  
1058 Organization. *Mol Cell* **62**, 668-680, doi:10.1016/j.molcel.2016.05.018 (2016).
- 1059 54 Ibrahim, D. M. & Mundlos, S. The role of 3D chromatin domains in gene regulation: a multi-  
1060 faceted view on genome organization. *Curr Opin Genet Dev* **61**, 1-8,  
1061 doi:10.1016/j.gde.2020.02.015 (2020).
- 1062 55 Boettiger, A. & Murphy, S. Advances in Chromatin Imaging at Kilobase-Scale Resolution.  
1063 *Trends Genet* **36**, 273-287, doi:10.1016/j.tig.2019.12.010 (2020).
- 1064 56 Bintu, B. *et al.* Super-resolution chromatin tracing reveals domains and cooperative interactions  
1065 in single cells. *Science* **362**, doi:10.1126/science.aau1783 (2018).

- 1066 57 Ma, H. *et al.* Spatial and temporal dynamics of DNA replication sites in mammalian cells. *J Cell*  
1067 *Biol* **143**, 1415-1425 (1998).
- 1068 58 Nakamura, H., Morita, T. & Sato, C. Structural organizations of replicon domains during DNA  
1069 synthetic phase in the mammalian nucleus. *Exp Cell Res* **165**, 291-297, doi:10.1016/0014-  
1070 4827(86)90583-5 (1986).
- 1071 59 Baddeley, D. *et al.* Measurement of replication structures at the nanometer scale using super-  
1072 resolution light microscopy. *Nucleic Acids Res* **38**, e8, doi:10.1093/nar/gkp901 (2010).
- 1073 60 Schermelleh, L., Heintzmann, R. & Leonhardt, H. A guide to super-resolution fluorescence  
1074 microscopy. *J Cell Biol* **190**, 165-175, doi:jcb.201002018 [pii]10.1083/jcb.201002018 (2010).
- 1075 61 Cremer, C. & Masters, B. R. Resolution enhancement techniques in microscopy. *Eur Phys J H*  
1076 **38**, 281-344 (2013).
- 1077 62 Trzaskoma, P. *et al.* Ultrastructural visualization of 3D chromatin folding using volume electron  
1078 microscopy and DNA in situ hybridization. *Nat Commun* **11**, 2120, doi:10.1038/s41467-020-  
1079 15987-2 (2020).
- 1080 63 Otterstrom, J. *et al.* Super-resolution microscopy reveals how histone tail acetylation affects  
1081 DNA compaction within nucleosomes in vivo. *Nucleic Acids Res*, doi:10.1093/nar/gkz593  
1082 (2019).
- 1083 64 Ricci, M. A., Manzo, C., Garcia-Parajo, M. F., Lakadamyali, M. & Cosma, M. P. Chromatin fibers  
1084 are formed by heterogeneous groups of nucleosomes in vivo. *Cell* **160**, 1145-1158,  
1085 doi:10.1016/j.cell.2015.01.054 (2015).
- 1086 65 Markaki, Y., Smeets, D., Cremer, M. & Schermelleh, L. Fluorescence in situ hybridization  
1087 applications for super-resolution 3D structured illumination microscopy. *Methods Mol Biol* **950**,  
1088 43-64, doi:10.1007/978-1-62703-137-0\_4 (2013).
- 1089 66 Salic, A. & Mitchison, T. J. A chemical method for fast and sensitive detection of DNA synthesis  
1090 in vivo. *Proc Natl Acad Sci U S A* **105**, 2415-2420, doi:10.1073/pnas.0712168105 (2008).
- 1091 67 Durand, N. C. *et al.* Juicebox Provides a Visualization System for Hi-C Contact Maps with  
1092 Unlimited Zoom. *Cell Syst* **3**, 99-101, doi:10.1016/j.cels.2015.07.012 (2016).
- 1093 68 Durand, N. C. *et al.* Juicer Provides a One-Click System for Analyzing Loop-Resolution Hi-C  
1094 Experiments. *Cell Syst* **3**, 95-98, doi:10.1016/j.cels.2016.07.002 (2016).
- 1095 69 Javanmoghadam-Kamrani, S. & Keyomarsi, K. Synchronization of the cell cycle using  
1096 lovastatin. *Cell Cycle* **7**, 2434-2440, doi:10.4161/cc.6364 (2008).
- 1097 70 Guillou, E. *et al.* Cohesin organizes chromatin loops at DNA replication factories. *Genes Dev*  
1098 **24**, 2812-2822, doi:10.1101/gad.608210 (2010).
- 1099 71 Schindelin, J. *et al.* Fiji: an open-source platform for biological-image analysis. *Nat Methods* **9**,  
1100 676-682, doi:10.1038/nmeth.2019 (2012).
- 1101 72 Dobbie, I. M. *et al.* OMX: a new platform for multimodal, multichannel wide-field imaging. *Cold*  
1102 *Spring Harb Protoc* **2011**, 899-909, doi:10.1101/pdb.top121 (2011).
- 1103 73 Pau, G., Fuchs, F., Sklyar, O., Boutros, M. & Huber, W. EBImage--an R package for image  
1104 processing with applications to cellular phenotypes. *Bioinformatics* **26**, 979-981,  
1105 doi:10.1093/bioinformatics/btq046btq046 [pii] (2010).
- 1106 74 R Core Team. (R Foundation for Statistical Computing, Vienna, Austria, 2013).

## 1109 Acknowledgments

1110 We thank Stefan Müller, University of Munich (LMU), for kindly providing labeled chromosome painting  
1111 probes for 3D-FISH experiments and Irina Solovei, University of Munich (LMU), for generously providing  
1112 antibodies, lab space and facilities to MC. We are most grateful to Toyoaki Natsume from the lab of  
1113 Masato Kanemaki (Center of Frontier Research, National Institute of Genetics, Mishima, Shizuoka  
1114 Japan) for providing HCT116-RAD21-mAC cells. KB was supported by the International Max Planck  
1115 Research School for Molecular Life Sciences (IMPRS-LS). Microscopic images were acquired at  
1116 microscopes of the Center for Advanced Light Microscopy (CALM) at the LMU Munich.

## 1117 Authors contributions

1119 TC and ELA initiated the study; MC and TC conceived the microscopic experiments together with HH,  
1120 KB and AM. KB, MC, AM and MGO performed experiments shown in Figs. 1- 4,6,8 and Supplementary  
1121 Figs. 2- 7. AM and KB performed live cell and super-resolution/confocal microscopy; HH provided input

1122 on quantitative image analysis, including statistical analysis; AM performed segmentation analyses and  
1123 VS 3D image analyses for chromatin density mapping data; MGO performed 3D rendering of nuclei. SM  
1124 performed RAD21-mClover intensities by high-throughput imaging and DNA Halo experiments with  
1125 support of MCC shown in Supplementary Figs. 2 and 9. Hi-C data were generated by SSPR and ELA  
1126 with experimental support of NM (Fig. 5). Repli-Seq data (Fig. 7) were provided by DMG and KNK. HL  
1127 provided input for the 3D imaging part and MCC for the replication part. MC and TC wrote the manuscript  
1128 with support from all authors, in particular from ELA.

1129

### 1130 **Competing interests**

1131 The authors declare to have no competing interests.

1132

### 1133 **Consent for publication**

1134 All authors read and approved the manuscript.

1135

### 1136 **Ethical approval and consent to participate**

1137 Not applicable

1138

### 1139 **Funding**

1140 This work was supported by grants of the Deutsche Forschungsgemeinschaft (GRK1657/TP1C and  
1141 CA198/9-2) to MCC and by the DFG Priority Program SPP 2202 to HH and HL. KB was supported by a  
1142 grant from the National Human Genome Research Institute (RM1-HG007743-02CEGS - Center for  
1143 Photogenomics) given to HL and HH. ELA was supported by an NSF Physics Frontiers Center Award  
1144 (PHY1427654), the Welch Foundation (Q-1866), a USDA Agriculture and Food Research Initiative  
1145 Grant (2017-05741), an NIH 4D Nucleome Grant (U01HL130010), and an NIH Encyclopedia of DNA  
1146 Elements Mapping Center Award (UM1HG009375).

1147
