1 **Cohesin depleted cells pass through mitosis**  
2 **and reconstitute a functional nuclear architecture**

3  
4 Marion Cremer<sup>1,\*§</sup>, Katharina Brandstetter<sup>2,\*</sup>, Andreas Maiser<sup>2</sup>, Suhas S P Rao<sup>3,4</sup>,  
5 Volker Schmid<sup>5</sup>, Namita Mitra<sup>3</sup>, Stefania Mamberti<sup>6</sup>, Kyle-N Klein<sup>7</sup>, David M Gilbert<sup>7</sup>,  
6 Heinrich Leonhardt<sup>2</sup>, Maria Cristina Cardoso<sup>6</sup>, Erez Lieberman Aiden<sup>3,8,9,10</sup>,  
7 Hartmann Harz<sup>2,§</sup>, Thomas Cremer<sup>1,§</sup>  
8

- 9  
10 1. Anthropology and Human Genomics, Department Biology II, Ludwig-Maximilians-Universität  
11 München, Germany  
12 2. Human Biology & BiImaging, Center for Molecular Biosystems, Department Biology II, Ludwig-  
13 Maximilians-Universität München, Germany  
14 3. Center for Genome Architecture, Department of Molecular and Human Genetics, Baylor College  
15 of Medicine, Houston, Texas, United States of America  
16 4. Department of Structural Biology, Stanford University School of Medicine, California, United  
17 States of America  
18 5. BiImaging Group, Department of Statistics, Ludwig-Maximilians-Universität München,  
19 Germany  
20 6. Cell Biology and Epigenetics, Department of Biology, Technische Universität Darmstadt,  
21 Germany  
22 7. Department of Biological Science, Florida State University, Tallahassee, Florida, United States  
23 of America  
24 8. Center for Theoretical Biological Physics, Rice University, Houston, Texas, United States of  
25 America  
26 9. Broad Institute of the Massachusetts Institute of Technology and Harvard University,  
27 Cambridge, Massachusetts, United States of America  
28 10. Departments of Computer Science and Computational and Applied Mathematics, Rice  
29 University, Houston, Texas, United States of America  
30  
31  
32  
33  
34  
35  
36  
37  
38  
39  
40  
41  
42

\*equal contribution, § corresponding authors

43 **Abstract**

44 The human genome forms thousands of “contact domains”, which are intervals of enhanced  
45 contact frequency. Some, called “loop domains” are thought to form by cohesin-mediated loop  
46 extrusion. Others, called “compartmental domains”, form due to the segregation of active and  
47 inactive chromatin into A and B compartments. Recently, Hi-C studies revealed that the  
48 depletion of cohesin leads to the disappearance of all loop domains within a few hours, but  
49 strengthens compartment structure. Here, we combine live cell microscopy, super-resolution  
50 microscopy, Hi-C, and studies of replication timing to examine the longer-term consequences  
51 of cohesin degradation in HCT-116 human colorectal carcinoma cells, tracking cells for up to  
52 30 hours. Surprisingly, cohesin depleted cells proceed through an aberrant mitosis, yielding a  
53 single postmitotic cell with a multilobulated nucleus. Hi-C reveals the continued disappearance  
54 of loop domains, whereas A and B compartments are maintained. In line with Hi-C, microscopic  
55 observations demonstrate the reconstitution of chromosome territories and chromatin  
56 domains. An interchromatin channel system (IC) expands between chromatin domain clusters  
57 and carries splicing speckles. The IC is lined by active chromatin enriched for RNA Pol II and  
58 depleted in H3K27me3. Moreover, the cells exhibit typical early-, mid-, and late- DNA  
59 replication timing patterns. Our observations indicate that the functional nuclear  
60 compartmentalization can be maintained in cohesin depleted pre- and postmitotic cells.  
61 However, we find that replication foci – sites of active DNA synthesis – become physically  
62 larger consistent with a model where cohesin dependent loop extrusion tends to compact  
63 intervals of replicating chromatin, whereas their genomic boundaries are associated with  
64 compartmentalization, and do not change.

65



66 **Abbreviations**

- 67 3D FISH = 3D fluorescence in situ hybridization  
68 3D SIM = 3D structured illumination microscopy  
69 AID = auxin inducible degron  
70 ANC / INC = active / inactive nuclear compartment  
71 CT = chromosome territory  
72 CD(C) = chromatin domain (cluster)  
73 CTCF = CCCTC binding factor  
74 DAPI = 4',6-diamidino-2-phenylindole  
75 EdU = 5-Ethynyl-2'-deoxyuridine  
76 Hi-C = chromosome conformation capturing combined with deep sequencing  
77 IC = interchromatin compartment  
78 MLN = multilobulated nucleus  
79 NC = nucleosome cluster  
80 PBS = phosphate buffered saline  
81 PBST = phosphate buffered saline with 0.02% Tween  
82 PR = perichromatin region  
83 RD = replication domain  
84 RL = replication labeling  
85 TAD = topologically associating domain  
86

## 87 **Introduction**

88 Cohesin, a ring-like protein complex with its major subunits RAD21, SMC1 and SMC3 is  
89 involved in numerous nuclear processes, such as in double strand break repair and gene  
90 regulation, by exerting its key function of tethering distant genomic loci [1-7]. In addition,  
91 cohesin entraps sister chromatids to ensure faithful chromosome segregation during mitosis  
92 (reviewed in [1]).

93 In recent years cohesin's ability as shaper of chromatin loops in the sub-Mb range  
94 anchored at CTCF/cohesin binding sites [8, 9] has moved into the spotlight of research. Hi-C  
95 studies have indicated that these loops, which manifest as bright peaks in contact frequency  
96 in a Hi-C map, demarcate contact domains [10, 11]. They manifest as squares of enhanced  
97 contact frequency in a Hi-C map and correspond to self-interacting genomic intervals between  
98 50kb and 1Mb where DNA sequences physically interact with each other more frequently  
99 compared to sequences outside a given domain [12, 13]. Loop domains thus comprise a  
100 structural unit of chromatin organization [14, 15].

101 Studies on the impact of cohesin in nuclear functions have become highly facilitated by  
102 an approach, which triggers a rapid and selective proteolysis of RAD21 by integrating an auxin-  
103 inducible degron (AID) system and its fusion to both endogenous RAD21 alleles into a given  
104 cell line [16] (for review see [17]). Addition of auxin results in RAD21 proteolysis with the  
105 concomitant disintegration of cohesin from chromatin [18].

106 Using this system in the colon cancer derived HCT116-RAD21-mAC cell line, we  
107 recently demonstrated the rapid disappearance of loop domains in Hi-C contact matrices  
108 averaged over large cell populations [18]. Compartments, manifesting when chromatin  
109 intervals with common histone signatures co-localize [13], were retained and even  
110 strengthened, leading to the presence of compartment domains and even compartment loops  
111 (but no loop domains) in the treated cells [18]. Other studies, using different cell types and  
112 approaches for cohesin elimination yielded similar results [19-21], (reviewed in [22]).

113 Here, we study the longer-term consequences of cohesin depletion and its effects on  
114 the higher order nuclear architecture via a combination of super-resolution and live cell  
115 microscopy, as well as Hi-C and Repli-Seq. We found that cohesin depleted interphase cells

116 proceed through a greatly prolonged mitosis resulting in a single cell with one multilobulated  
117 nucleus (MLN) after chromatid segregation. With Hi-C we confirm both the continued  
118 disappearance of loop domains and the maintenance of A and B compartments in MLN. With  
119 super-resolved microscopy we demonstrate that nuclei of pre- and postmitotic cohesin  
120 depleted cells maintain principal structural features of the ANC-INC model (reviewed in [23-  
121 25]). According to this model, which has been supported by electron microscopy and 3D super-  
122 resolution fluorescence microscopic studies from various species and cell types, the global  
123 nuclear landscape is shaped by chromosome territories (CTs) built up from chromatin domains  
124 (CDs) and chromatin domain clusters (CDCs). CDCs show a multilayered shell-like  
125 organization with increasing chromatin compaction levels from the periphery toward the interior  
126 CDC core. An interconnected system of interchromatin channels, called the interchromatin  
127 compartment (IC), pervades the spaces between CDCs. The IC carries splicing speckles and  
128 nuclear bodies within IC-lacunae and plays a central role in the formation of various nuclear  
129 machineries. IC-channels penetrate the layer of heterochromatin beneath the nuclear  
130 envelope and form direct contacts with nuclear pore complexes. The IC is lined by CDs with  
131 less compacted chromatin, first described in electron microscopic studies as the perichromatin  
132 region (for review see [26]). The PR serves as the preferential nuclear subcompartment for  
133 transcription and co-transcriptional splicing. The IC and PR form the active nuclear  
134 compartment (ANC), whereas CDs with a more compact, 'closed' chromatin configuration are  
135 located further away from the IC and comprise the INC.

136 We also examined replication timing, which has been linked to domain structure [27].  
137 Strikingly, the absence of cohesin did not lead to major changes in replication timing or in the  
138 genomic extent of replication domains (RDs), indicating that the two structures form by  
139 independent mechanisms. Instead, we find that the boundaries of RDs closely match those of  
140 the A and B compartments both before and after cohesin degradation. This matches the Repli-  
141 Seq findings reported in [28] and is consistent with the observation of [29]. Taken together, our  
142 findings indicate that replication domains correspond with compartment domains, but not with  
143 loop domains. However, we find that the physical size of replication foci is smaller, suggesting  
144 that cohesin-dependent extrusion may play a role in the physical compaction of replicating

145 chromatin.

146

## 147 **Results**

### 148 **Validation of auxin induced proteolysis of the cohesin subunit RAD21**

149 All experiments of this study were performed with the human colon cancer derived cell line  
150 HCT116-RAD21-mAC [16], where an auxin-inducible degron (AID) is fused to both  
151 endogenous RAD21 alleles and to a fluorescent reporter (see Suppl\_Fig.1). The complete loss  
152 of RAD21-mClover fluorescence was seen in live cell observations ~1:30h after incubation in  
153 500  $\mu$ M auxin (Suppl\_Fig.2A). Degradation of RAD21 was confirmed by negative  
154 immunostaining with a RAD21 antibody, while epitopes of cohesin subunits SMC1 and SMC3  
155 remained intact under auxin shown by persisting positive immunodetection with respective  
156 antibodies (Suppl\_Fig.2B). Notably, a small fraction of cells in our cultures (~2-4%) escaped  
157 auxin induced RAD21 degradation. In order to exclude non-responsive cells from further  
158 analyses of the impact of cohesin depletion, RAD21-mClover fluorescence was routinely  
159 recorded in all experiments with auxin treated cell populations except for 3D-FISH experiments  
160 since DNA heat denaturation destroys the reporter fluorescence [30].

161

### 162 **Cohesin depletion leads to delayed mitosis and final transition into a single postmitotic 163 cell with a multilobulated nucleus (MLN)**

164 Using time lapse imaging over 21h at  $\Delta t=15$ min, we compared in parallel entrance into mitosis,  
165 mitotic progression and exit in untreated controls and in cohesin depleted HCT116-RAD21-  
166 mAC cells, where auxin was added just before starting live cell observations. In control cells  
167 (Fig. 1A) ~80% of all recorded mitoses (n=45) passed mitosis within <1h and formed two  
168 inconspicuous daughter nuclei. A second mitosis observed for individual nuclei ~20h after the  
169 first division demonstrates their capacity to divide again under the given observation  
170 conditions. Notably, about 20% of mitoses recorded in untreated control cells revealed  
171 prolonged mitoses of >2h followed by transition into an abnormal cell nucleus, a feature which  
172 is not unusual in tumor cell lines (reviewed in [31]). Mitotic entrance of auxin treated cells

173 (n=32) did not show any conspicuous differences to controls (Fig.1B). However, their passage  
174 through mitosis was consistently delayed up to 14h (median 4.5h). This prolonged mitotic stage  
175 raised the mitotic index in cohesin depleted cell cultures fixed after 6h in auxin to almost 30%  
176 versus ~4% in control cultures (Suppl\_Fig.3). The delayed mitotic passage was associated  
177 with the formation of abnormal multipolar mitotic figures persisting over several hours. Fig. 1C  
178 depicts a typical telophase stage of ~30 min with two apparent daughter nuclei preceding the  
179 formation of a single MLN. Despite their seemingly separation, these daughter nuclei, however,  
180 were presumably still connected by filaments (see below) and did not enter into cytokinesis.  
181 Instead, all cohesin depleted cells that were followed through an entire mitosis (n=19) resulted  
182 in a single MLN (Fig.1B-C). As a consequence, in cell cultures fixed 28-30h after cohesin  
183 depletion, MLN accumulated up to ~60% versus ~2% in control cultures (Suppl\_Fig.3). MLN  
184 were noted in cell cultures kept up to 50h where a considerable fraction of apoptotic cell nuclei  
185 indicated their decline (data not shown).

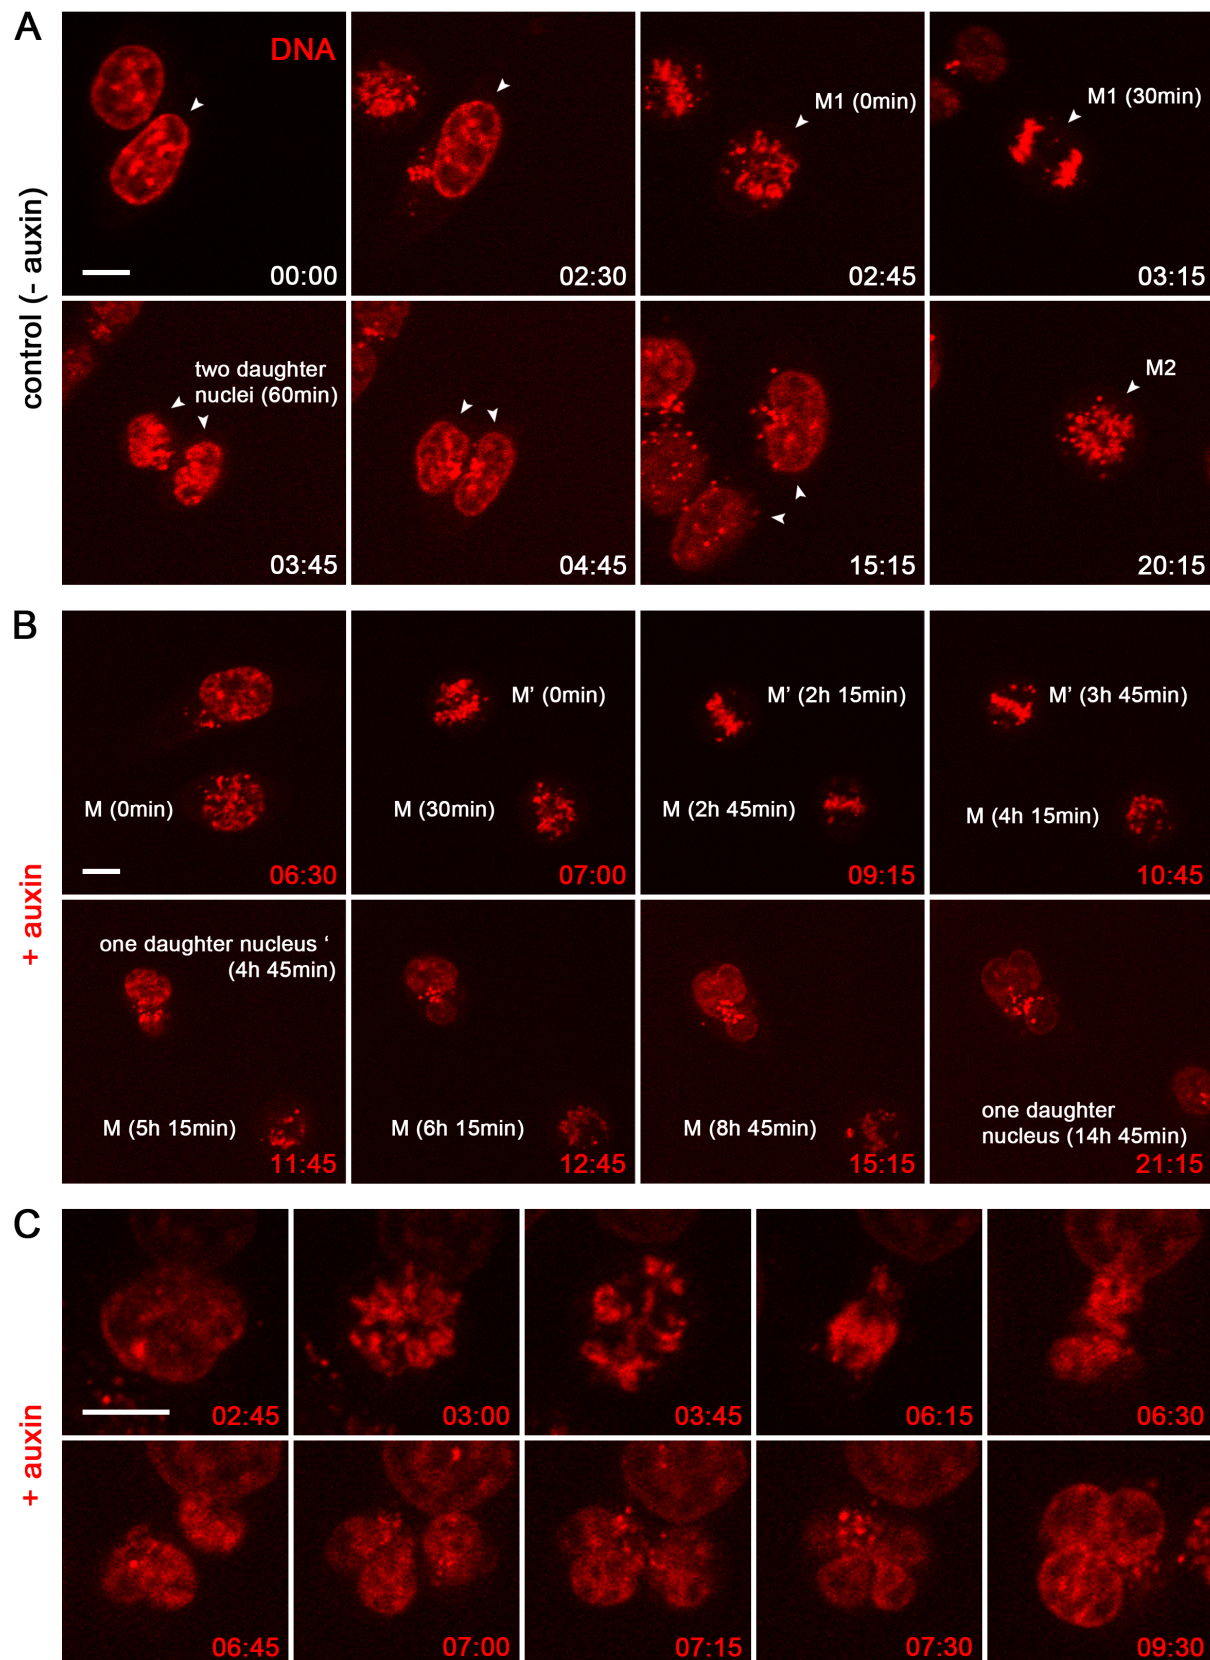

186

187 **Fig. 1: Live cell microscopy demonstrating highly prolonged abnormal mitosis and**  
188 **subsequent formation of one multilobulated nucleus (MLN) in cohesin depleted cells**

189 **(A)** Selected points from time lapse imaging ( $\Sigma t=21h$ ,  $\Delta t=15min$ ) of untreated control cells (DNA  
190 stained with SiR-DNA, red) with accomplishment of mitosis (M1) within 1h (time 02:45 – 03:45) and



191 subsequent formation of two daughter nuclei. A second mitosis (M2) of one daughter nucleus is  
192 shown at time 20:15. **(B)** Selected time lapse images of nuclei after cohesin degradation conducted  
193 in parallel to control cells demonstrate a prolonged mitotic stage. Mitosis (M) emerges at time 6:30  
194 after auxin treatment, transition into one abnormal multilobulated daughter nucleus (MLN) is seen  
195 14:45h later (time 21:15). Mitosis (M') emerges 7h after auxin treatment (time 07:00), transition into  
196 an MLN is seen 4:45h later (time 11:45). **(C)** Time lapse imaging from the same series at a higher  
197 zoom shows the formation of an aberrant mitosis apparently reaching telophase at time 6:30. 15  
198 min later two seemingly separated daughter nuclei, presumably connected by filaments, become  
199 fused into one MLN at time 7:15. Scale bar: 10  $\mu\text{m}$   
200

201 **Global features of higher order chromatin organization persist after cohesin depletion**  
202 **and are re-established in MLN after mitosis despite the loss of loop domains**

203

204 *Maintenance and re-formation of chromosome territories (CTs)*

205 Maintenance of a territorial organization of interphase chromosomes in cohesin depleted cell  
206 cultures was tested by chromosome painting of CTs 4, 12 and 19 (Fig. 2). In line with the near-  
207 diploid karyotype of HCT116 cells [32, 33], two homologous territories of each painted  
208 chromosome were detected in interphase nuclei of both control (Fig. 2A) and cohesin depleted  
209 cells fixed after 6h auxin treatment (Fig. 2B). Segregation of chromatids in cohesin depleted  
210 cells was noted in anaphase (Fig. 2C, mid). Accordingly, a substantial fraction of postmitotic  
211 MLN revealed four painted territories often located in different lobuli (Fig. 2D). Unexpectedly,  
212 chromosome painting, however, detected also MLN with more than four variably sized painted  
213 segments for a given painted chromosome (Fig. 2E and Suppl\_Fig. 4). Arguably, chromatids  
214 were torn apart by mechanic forces during an aberrant anaphase and/or during lobe formation.  
215 This disruption was possibly enhanced by a higher level of relaxation / decondensation in  
216 cohesin depleted chromatin (see below).

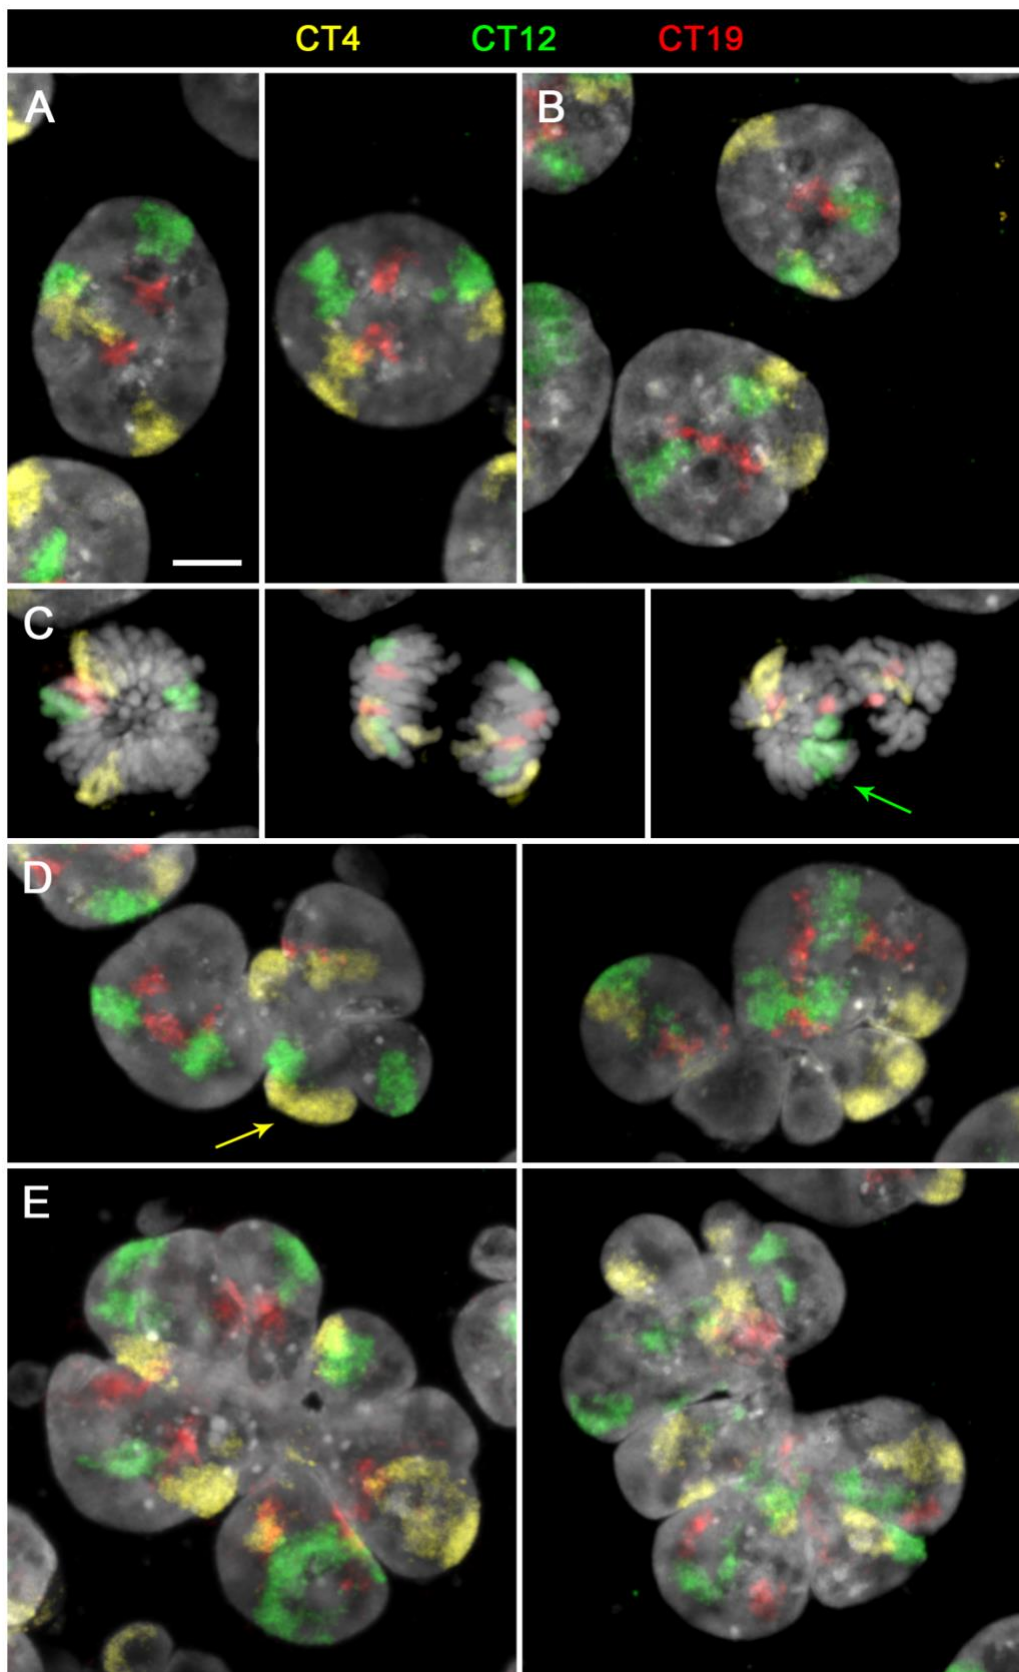

217

218 **Fig. 2: Maintenance of chromosome territories (CTs) in cohesin depleted nuclei and**  
219 **their re-establishment after mitosis**

220 **(A-E)** Z-projections of entire DAPI stained nuclei (gray) with painted territories of chromosomes 4  
221 (yellow), 12 (green) and 19 (red) acquired by confocal fluorescence microscopy. **(A)** Control nuclei



222 and **(B)** cohesin depleted premitotic nuclei with normal phenotypes after 6h in auxin show two  
223 inconspicuous copies for each CT. **(C)** Mitoses from 6h auxin treated cultures with two coherent  
224 chromosomes in an (early) metaphase plate (*left*), segregated chromatids in anaphase (*mid*) and  
225 missegregation of chromosome 12 (arrow) in an abnormal mitotic figure (*right*). **(D)** Postmitotic  
226 multilobulated nuclei (MLN) with four copies for each CT. Arrow marks two CTs 4 that cannot be  
227 distinguished in the z-projection. **(E)** MLN with >4 painted regions for each CT (compare also  
228 Suppl\_Fig. 4). Scale bar: 5  $\mu$ m

229

230 *Maintenance of co-aligned functionally interacting active and inactive nuclear compartments*  
231 *(ANC-INC) in nuclei of cohesin depleted pre- and postmitotic cells*

232 3D structured illumination microscopy (3D-SIM) revealed similar chromatin compaction  
233 patterns both in DAPI stained control and cohesin depleted nuclei, including postmitotic MLN.  
234 This and other findings described below provide evidence for major structural and functional  
235 features of the ANC-INC model (Fig. 3 and 4, and introduction). For a quantitative analysis of  
236 nuclear serial sections, DAPI fluorescence was divided into seven intensity classes with equal  
237 intensity variance (color code in Fig.3). This representation of nuclear landscapes as color heat  
238 maps with increasing DNA densities (Fig 3 A-C) served as proxy for classes with increasing  
239 chromatin compaction [34]. Class 1 (lowest DNA density) represents the interchromatin  
240 compartment (IC), classes 2 (and 3) comprise low compaction CDs lining the IC. At the nuclear  
241 periphery IC-channels expand between lamina associated domains toward nuclear pores (Fig.  
242 3D-F). The quantitative assessment of voxels attributed to the seven DAPI intensity classes  
243 showed a slight shift towards less compacted chromatin (classes 1 and 2) in cohesin depleted  
244 nuclei compared to controls (Fig. 3G), in line with a slight increase of nuclear volumes after 6h  
245 cohesin depletion. The ~2-fold increased nuclear volume in MLN (30h auxin) reflects the  
246 double amount of DNA in these postmitotic cells. (Fig. 3H).

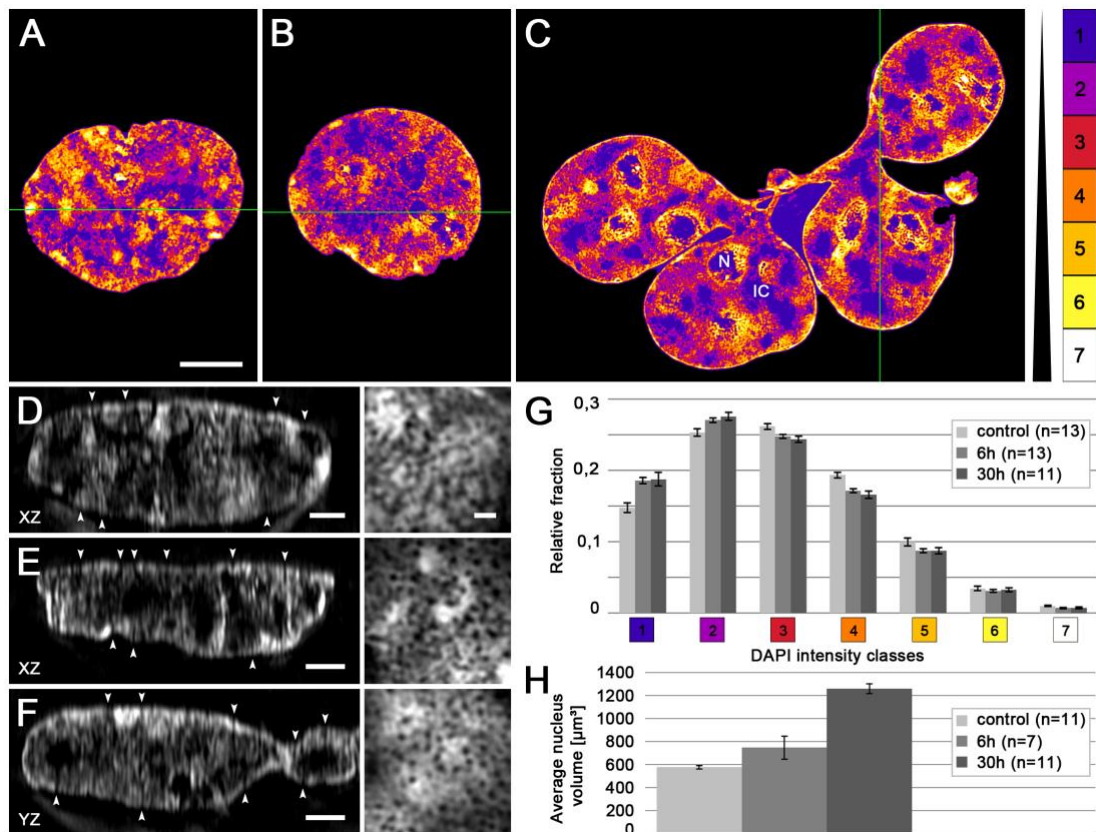

247

### 248 **Fig. 3: Topological chromatin compaction mapping**

249 **(A-C)** DAPI stained mid-sections of representative nuclei acquired by 3D-SIM from **(A)** control  
 250 nucleus; **(B)** Cohesin depleted nucleus (6h auxin); **(C)** Cohesin depleted multilobulated nucleus  
 251 (MLN) (30h auxin). Chromatin compaction of nuclei based on seven DAPI intensity classes is  
 252 displayed in false colors. Class 1 (*blue*) represents pixels close to background intensity, largely  
 253 reflecting the interchromatin compartment (IC), class 7 (*white*) pixels with highest intensities. All  
 254 nuclei in A-C reveal a network of chromatin domain clusters (CDCs) comprising a compacted core  
 255 and a surrounding low-density layer co-aligned with class 1 regions that meander between CDCs  
 256 as part of the IC. Likewise, all nuclei display a rim of compacted (hetero)chromatin at the nuclear  
 257 periphery and around nucleoli. N = nucleolus; IC = interchromatin channels/lacunae. The green  
 258 lines indicate the section plane for xz/yz cross sections of the respective nuclei shown in (D-F).  
 259 Scale bar: 5  $\mu\text{m}$ . **(D-F)**(*left column*): cross sections from nuclei shown in (A-C) demonstrate  
 260 connections from the IC with nuclear pores (arrowheads); (*right column*): nuclear pores from  
 261 respective nuclei shown in apical z-sections. Scale bars: 2  $\mu\text{m}$  in cross sections; 0.5  $\mu\text{m}$  in apical  
 262 z-sections; **(G)** Relative 3D signal distributions of DAPI intensity classes in control nuclei, in 6h  
 263 auxin treated nuclei and 30h auxin treated MLN reveal an overall similar profile for each series, yet  
 264 with a relative increase of classes 1 and 2 ( $p < 0.05$  for control vs 6h and 30h auxin) and a relative  
 265 decrease of classes 3 and 4 ( $p < 0.05$  for control vs 6h and 30h auxin) in cohesin depleted nuclei.  
 266 *Error bars*= standard error of the mean (SEM) **(H)** Average nuclear volumes from the same series  
 267 of nuclei show an increase of nuclear volumes after cohesin depletion. Note that MLN after 30h  
 268 auxin are assumed to contain the double DNA amount compared to controls (for statistical tests  
 269 and significance see Suppl\_Table 1).

270 For a quantitative mapping of functionally relevant markers on DAPI intensity classes,  
271 we performed immunostaining of SC35, an integral protein of splicing speckles, involved in co-  
272 transcriptional splicing and transcriptional elongation [35, 36], of RNA Pol II, phosphorylated  
273 at Ser5, representing the transcription initiating form of RNA Pol II [37], and of histone  
274 H3K27me3 conveying a repressed chromatin state [38] (Fig. 4). SC35 was greatly enriched in  
275 the IC (intensity class1), while H3K27me3 chromatin was preferentially located in higher  
276 compacted CDs of both controls and cohesin depleted nuclei (Fig. 4A-C). RNA Pol II was  
277 enriched in the PR, i.e. decondensed chromatin lining the IC (Fig. 4D-F). Notwithstanding the  
278 significantly different distributions of SC35, RNA Pol II and H3K27me3 with regard to the seven  
279 DAPI intensity classes, a highly similar distribution was found for each marker both in controls  
280 and pre- and postmitotic cohesin depleted cells (Fig. 4G,H).

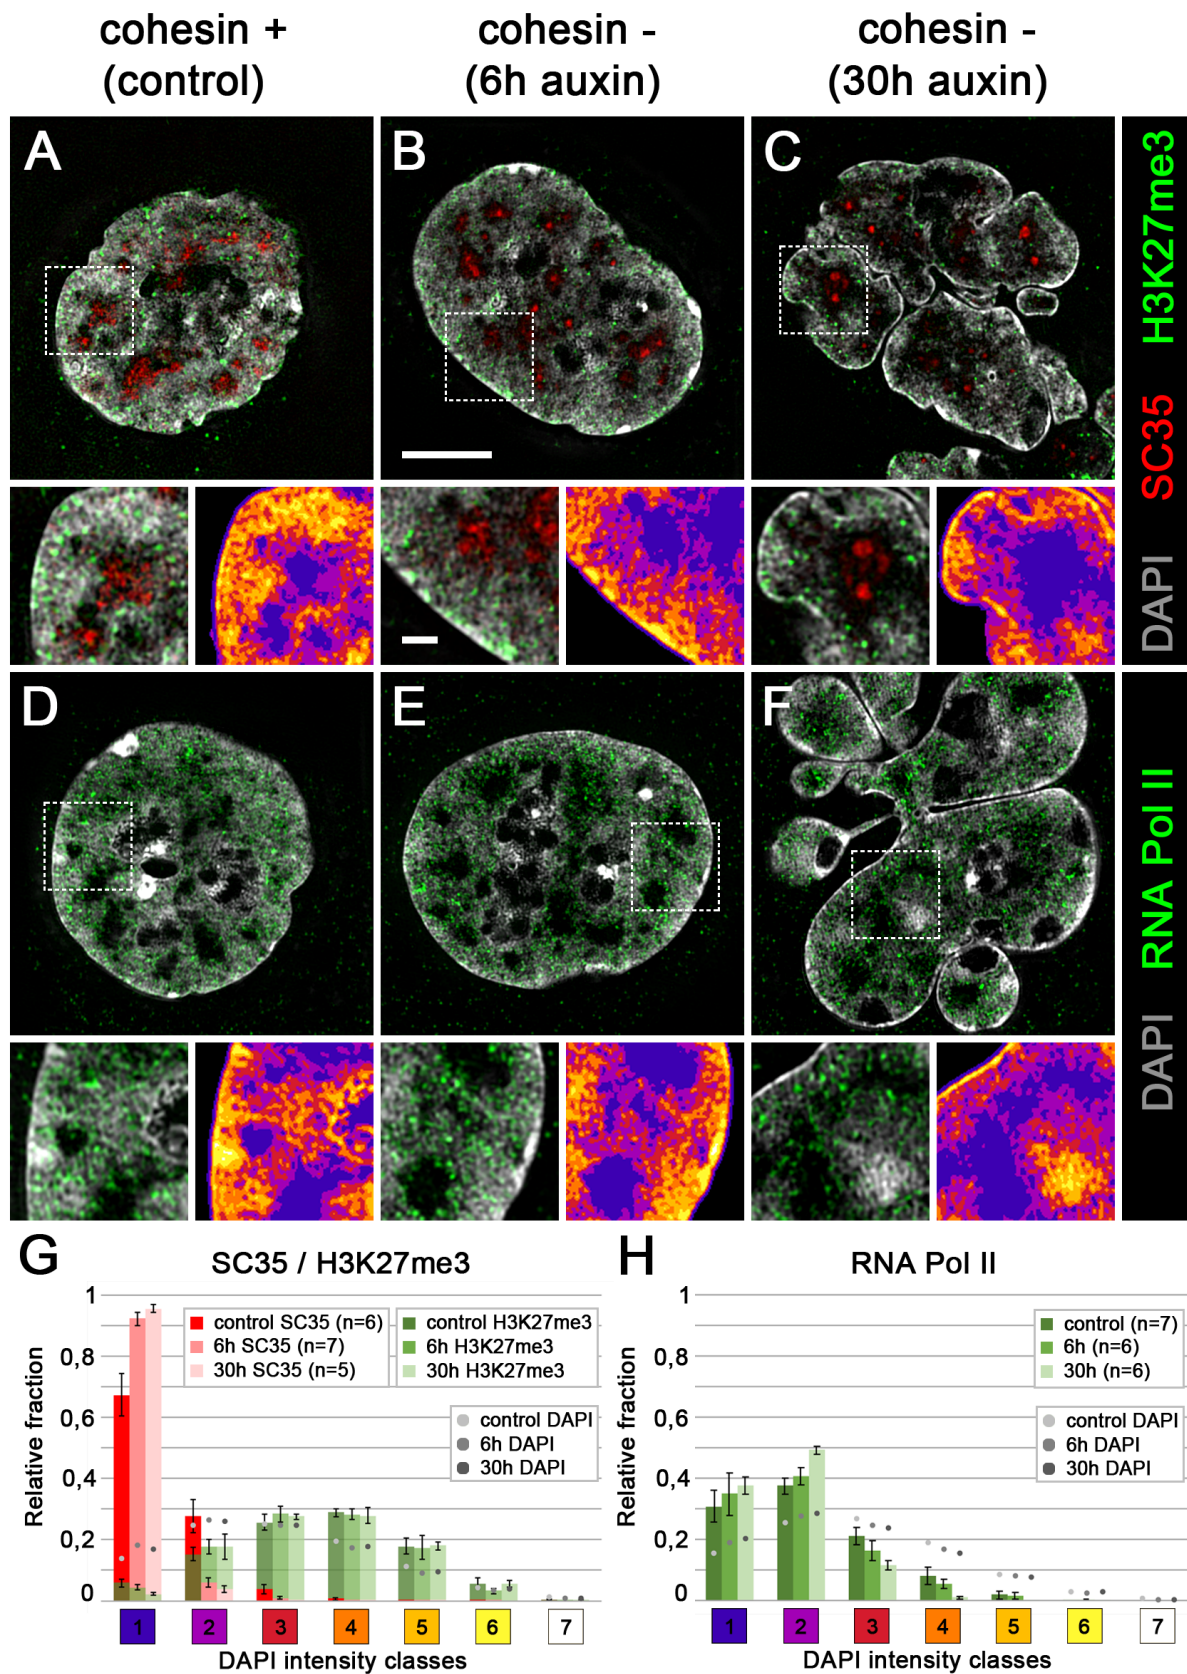

281

282 **Fig. 4: Maintenance of the 3D topography in cohesin depleted nuclei for nuclear markers**  
 283 **SC35, H3K27me3 and active RNA Pol II on chromatin compaction maps**

284 **(A-F)** SIM optical mid-sections from whole 3D acquisitions of DAPI stained nuclei (gray) with  
 285 **representative zoomed magnifications also displayed as classified DAPI intensity heat maps. (A-**



286 **C)** Immunostaining of SC35 (red) and H3K27me3 (green), **(D-F)** of active RNA Pol II with  
287 (A,D)=controls, (B,E) = 6h auxin treatment, (C,F) = postmitotic MLN after 30h auxin treatment.  
288 SC35 is mostly seen in class 1 reflecting the interchromatin compartment (IC), H3K27me3 is  
289 enriched in more compacted chromatin regions (classes 3-5). RNA Pol II shows a preferential  
290 localization at decondensed chromatin sites lining the IC in D-F. Scale bar: 5  $\mu$ m in mid-sections;  
291 1  $\mu$ m in insets. **(G)** Relative signal distribution of SC35 (red) and H3K27me3 (green), **(H)** of active  
292 RNA Pol II (green) on DAPI intensity classes 1-7 (DAPI distribution is marked as gray dots). The  
293 different color shades denote controls, 6h auxin and 30h auxin treated cells. With exception for  
294 SC35 in controls and cohesin depleted nuclei marker distributions between controls and cohesin  
295 depleted nuclei do not show significant differences (for statistical tests and significance see  
296 Suppl\_Table 1).

297

298 *In situ Hi-C data indicate a consistent disappearance of chromatin loops in cohesin depleted*  
299 *pre- and postmitotic nuclei but maintenance of A and B compartments*

300 *In situ Hi-C confirmed the disappearance of loop domains previously described in cohesin*  
301 *depleted premitotic cells [18, 20] also in postmitotic cell cultures, which were treated with auxin*  
302 *for 28h before fixation (Fig. 5A). In these cultures, most cells carried MLN (compare*  
303 *suppl\_Fig.3). A and B compartments are reconstituted in these postmitotic MLN (Fig. 5B). A*  
304 *heightened compartmentalization was noted in particular in B-type chromatin of MLN, as*  
305 *previously described for premitotic cohesin depleted cells [18]. Even in our low depth data from*  
306 *28h auxin treated postmitotic MLN cells, the strengthened interactions between this B-type*  
307 *subcompartment could be readily observed (Fig. 5C, lower right panel). While the functional*  
308 *identity or significance of this particular B-type subcompartment remains unknown, by k-means*  
309 *clustering of histone modification data for HCT116-RAD21-mAC cells [18], we were able to*  
310 *identify a histone modification cluster (consisting of depletion of both activating marks like*  
311 *H3K36me3 and H3K27Ac and repressive marks such as H3K27me3 and H3K9me3, but a mild*  
312 *enrichment of H3K79me2) that corresponded to the positions of this particular B-type*  
313 *subcompartment (Fig 5D).*

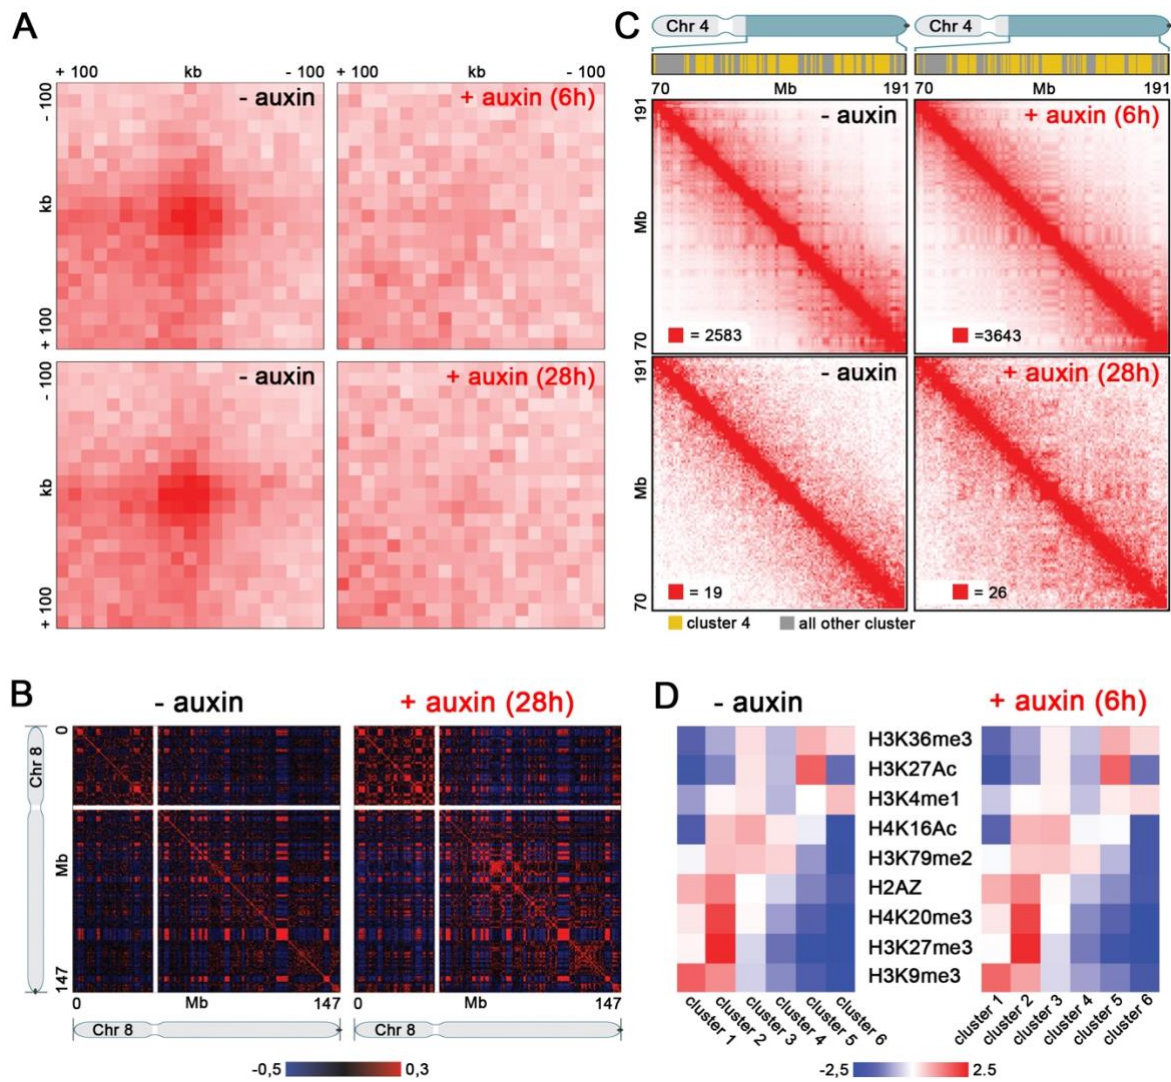

314

315 **Fig. 5: Hi-C data indicate elimination of chromatin loops, but maintenance of A and B**  
 316 **compartments in cohesin depleted pre- and postmitotic cells**

317 **(A)** Aggregate peak analysis (APA) plots using loops identified in HCT116-RAD21-mAC cells [18]  
 318 before and after 6h of auxin treatment (top) or before and after 28h of auxin treatment (bottom).  
 319 The plot displays the total number of contacts that lie within the entire putative peak set at the  
 320 center of the matrix. Loop strength is indicated by the extent of focal enrichment at the center of  
 321 the plot. **(B)** Pearson's correlation maps at 500 kb resolution for chromosome 8 before (left) and  
 322 after (right) 28h of auxin treatment. The plaid pattern in the Pearson's map, indicating  
 323 compartmentalization, is preserved in cohesin depleted nuclei even after 28h of auxin treatment.  
 324 **(C)** Contact matrices for chromosome 4 between 70 Mb and 191 Mb at 500 kb resolution before  
 325 (left) and after (right) cohesin depletion. The 6h cohesin depletion time is shown on top, and 28h  
 326 depletion time on the bottom. Interactions for loci in cluster 4 (annotated in yellow on top tracks)  
 327 are strengthened after both 6h or 28h of cohesin depletion. All loci belonging to clusters other than  
 328 cluster 4 are annotated in gray in the top track. **(D)** Clustering of histone modifications at 25 kb  
 329 resolution into six clusters reveals consistent clusters of histone modification before and after  
 330 cohesin depletion. For each cluster, the average log<sub>2</sub>-fold enrichment for each histone modification  
 331 over all loci in that cluster is shown.

332

333 *Same replication timing for cohesin depleted and non-depleted control cells seen by Hi-C and*  
334 *Repli-Seq data*

335 Using Repli-Seq and Hi-C analysis replication timing was measured by the ratio of early to late  
336 replicating DNA and was found preserved upon cohesin depletion (Suppl\_Fig. 5A,B).  
337 Additionally, the tight relationship between genome A/B compartmentalization and replication  
338 timing was similarly maintained in the absence of cohesin (Suppl\_Fig. 5C).

339

340 *Persistence of typical S-phase stage replication patterns after cohesin depletion and their*  
341 *restoration in postmitotic MLN*

342 The temporal order of DNA replication occurring at distinct replication sites as replication foci  
343 is highly coupled with genome architecture, resulting in typical patterns for early, mid and late  
344 replication timing [39]. These replication sites persist as stable chromatin units (replication  
345 domains, RDs) throughout interphase and during subsequent cell cycles [40-43] and were  
346 chosen in our study as reference structures for CDs (see Discussion). Replicating DNA was  
347 visualized by pulse replication labeling (RL), using an approach where fluorophore-conjugated  
348 dUTPs are incorporated by a short scratch of S-phase cells [42, 44]. RDs could then be  
349 visualized through the remaining and the next cell cycle without further detection steps. Images  
350 were acquired by 3D-SIM.

351 RD patterns were recorded in cells with the following culture conditions: Control  
352 cultures were fixed 6h after RL (Fig. 6A). Cultures prepared for cohesin depletion were further  
353 grown after RL for 1h under normal medium conditions and then exposed to auxin for 6h (Fig.  
354 6B,C) or 30h respectively (Fig. 6D), before fixation. Both, controls and auxin-treated cells  
355 revealed typical RD patterns for all S-phase stages. Fig. 6C shows a labeled nucleus that has  
356 entered mitosis. Our observations demonstrate that a given RD pattern not only persists during  
357 the subsequent interphase and along mitotic chromosomes (Fig. 6B,C) but can also be fully  
358 reconstituted after mitosis in MLN (Fig. 6D).

359 Moreover we showed that *de novo* DNA synthesis with the formation of typical  
360 replication patterns still occurs in cohesin depleted postmitotic MLN. Fig. 6E shows examples



361 where RL was performed under continuous auxin treatment in cells that were kept in auxin for  
362 30h prior to RL.

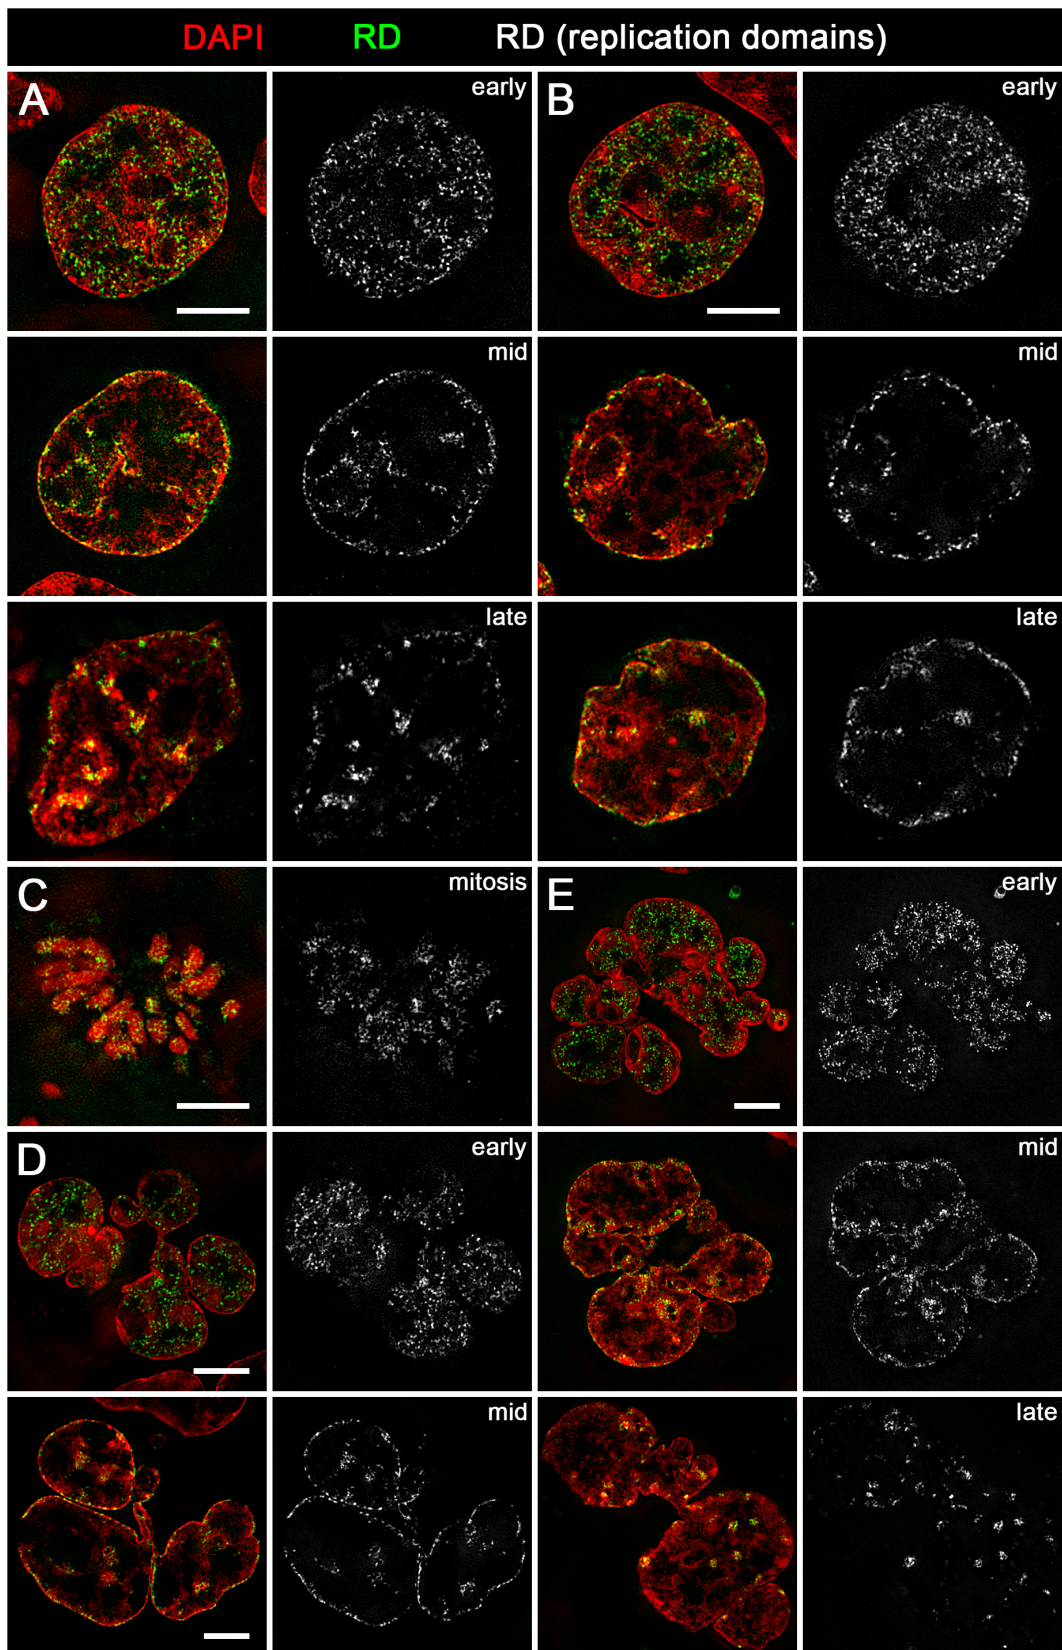

363

364 **Fig. 6: Maintenance, postmitotic re-establishment and de novo formation of typical**  
365 **replication patterns after cohesin depletion**



366 **(A-E)** Representative SIM sections of DAPI stained nuclei (red) with replication domains (RDs,  
367 green in overlay images) in different cell cycle stages. Respective RDs are in addition separately  
368 shown in gray. **(A)** Control nuclei fixed 6h after replication labeling (RL) delineating the typical  
369 patterns for early, mid and late replication. **(B)** Maintenance of typical replication patterns in cohesin  
370 depleted nuclei. For complete cohesin depletion nuclei were incubated for 6h in auxin after  
371 replication labeling performed in normal medium conditions. **(C)** Mitosis with RDs emerging from a  
372 replication labeled nucleus under conditions as described in (B). **(D)** Replication patterns in a  
373 postmitotic multilobulated nucleus (MLN). RL was performed in normal medium conditions and cells  
374 subsequently treated with auxin for 30h. Re-established RDs form typical early and mid-to-late  
375 replication patterns in individual lobuli. **(E)** *De novo* DNA synthesis with formation of typical  
376 replication patterns in MLN. Cells were treated with auxin for 30h prior to replication labeling under  
377 continuous auxin conditions. Scale bar: 5  $\mu$ m.  
378

### 379 **Individual replication domains (RDs) and DNA halo induced chromatin loops are** 380 **enlarged in cohesin depleted cells**

381 Finally, we tested whether cohesin depletion following RL during early S-phase results in  
382 numerical and/or structural changes of individual RDs (Fig. 7). We compared numbers of  
383 segmented RDs plotted as the mean value of counts / nucleus (Fig. 7B) and the total volumes  
384 of all segmented RDs, plotted as the mean total RD volume / nucleus (Fig. 7C) between control  
385 nuclei grown for 6h after RL in normal medium conditions, premitotic nuclei grown for 6h in  
386 auxin after RL, and postmitotic MLN grown for 30h in auxin after RL. Both, total volumes and  
387 counts of segmented RDs were higher in cohesin depleted nuclei and slightly increased with  
388 the duration of auxin induced degradation of cohesin, hinting to chromatin relaxation at the  
389 level of individual RDs.

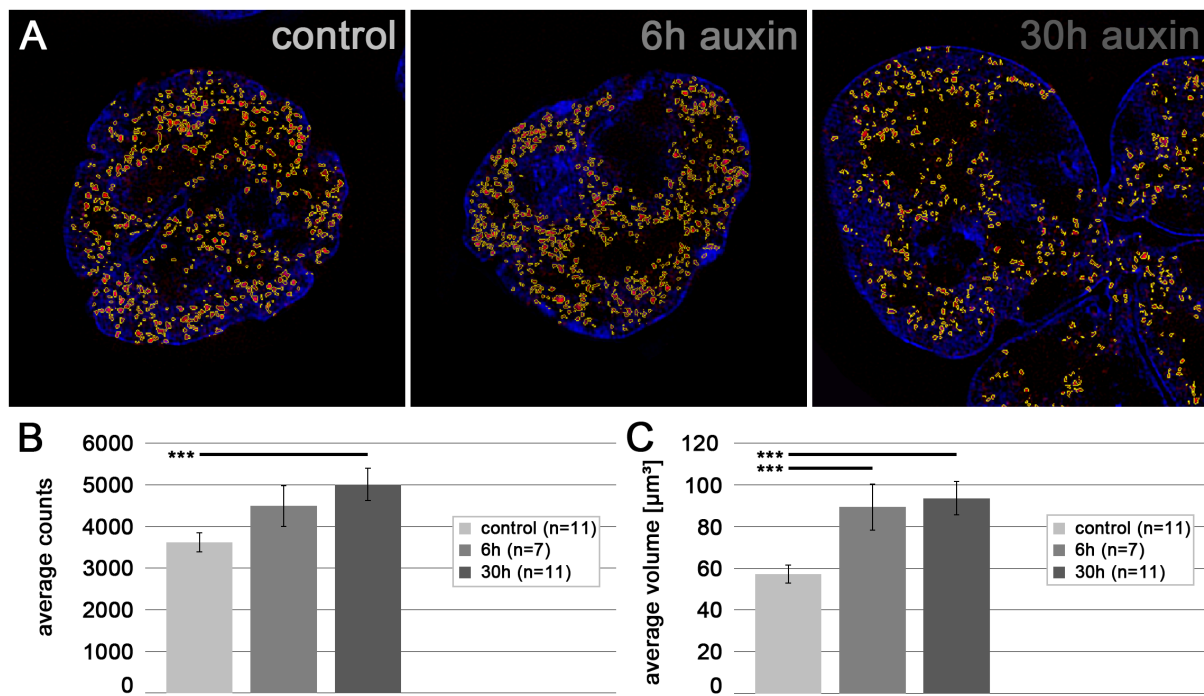

390

391 **Fig. 7: Segmentation of individual replication domains established in early S-phase**

392 **(A)** SIM optical mid-sections of DAPI stained nuclei (blue) from a control (*left*), a 6h auxin treated  
393 nucleus (*mid*) and a 30h auxin treated MLN (*right*). Replication labeling was performed prior to  
394 cohesin depletion. RDs are displayed in red with segmented borders lined in yellow. The lower  
395 density of RDs in the postmitotic MLN is clearly evident. **(B)** Average counts of segmented RDs  
396 plotted as the mean value of object counts / nucleus in each series. **(C)** Volumes of segmented  
397 RDs plotted as the mean total volume of RDs/nucleus in each series. Significance ( $p < 0.05$ )  
398 between series indicated by asterisks. Scale bar: 4  $\mu\text{m}$

399

400 An effect of cohesin depletion on RD structure was supported by a DNA halo approach,  
401 a technique to investigate changes in chromatin organization at the level of DNA loops [45].  
402 Histone extraction in interphase nuclei by high-salt incubation triggers the extrusion of  
403 chromatin loops from a densely stained central chromatin core thus providing a measure of  
404 their size. DAPI stained nuclei of cohesin depleted cells (6h auxin treatment) exhibited halos  
405 that were significantly larger and more variable in shape in comparison to the defined and  
406 compacted halos of control cells (Suppl\_Fig. 6).

407

408

409

410

## 411 **Discussion**

### 412 **Perturbed mitoses with formation of a single postmitotic multilobulated nucleus (MLN)** 413 **in cohesin depleted cells**

414 Our Repli-Seq data and live cell observations confirm an undisturbed cell cycle progress of  
415 cohesin depleted cells towards mitosis [28] and a disturbed course of mitotic progress [46]. In  
416 addition our time lapse observations reveal a so far unreported arrest of telophase in  
417 conjunction with a lack of cytokinesis, resulting in a single postmitotic cell harboring one MLN.  
418 Several factors may contribute to this outcome: cohesin loss was previously shown to prompt  
419 a defect of centrosome duplication and spindle pole integrity, as well as a compromised  
420 cohesin-mediated kinetochore-microtubule attachment [46] (reviewed in [1, 2]). Notably, in  
421 vertebrates cohesin is loaded onto DNA already in telophase [1, 5], which may be relevant for  
422 correct cytokinesis and daughter cell formation. Loss of cohesin is, however, not mandatory  
423 for the formation of MLN. MLN are found in cells with a mutant CTD Thr4-phosphorylation in a  
424 mitosis-specific form of RNA Pol II [47]. Multilobulation also arises in terminally differentiated  
425 granulocytes [48] and in tumor cells with extensive chromosomal rearrangements, such as  
426 Hodgkin lymphoma associated Reed-Sternberg cells [49]. Our observation of MLN as the  
427 mitotic outcome in ~2% of HCT116-RAD21-mAC control cells exemplifies the spontaneous  
428 occurrence of MLN in a near-diploid tumor cell line. Overall, the complex interactions of factors  
429 promoting MLN are still poorly understood [50, 51].

430

### 431 **Maintenance of principle features of higher order chromatin architecture in cohesin** 432 **depleted nuclei in line with the ANC-INC model**

433 Hallmarks of the ANC-INC model (reviewed in [23-25], see Introduction) were retained in  
434 cohesin depleted pre- and postmitotic cell nuclei. These hallmarks include the preservation of  
435 chromosome territories (CTs), chromatin domain clusters (CDCs) structurally organized by  
436 different compaction levels, an interchromatin (IC) channel system and the maintenance of an  
437 active compartment (ANC), represented by markers for transcriptional competence (here  
438 active RNA Pol II and splicing speckles) and a co-aligned inactive compartment (INC) with

439 repressed chromatin (H3K27me3).

440 We also examine replication domains (RDs). RDs defined by genome-wide Repli-Seq  
441 analyses are often considered to correspond to TADs mapped by Hi-C methods [27, 52] and  
442 as molecular equivalents of replication foci / domains observed by microscopic methods [53].  
443 Yet, a direct comparison of these structures is a delicate issue since neither RDs nor TADs  
444 are strictly defined: microscopically observable replication sites were initially reported in rat  
445 fibroblast nuclei with an average DNA content of ~1 Mb [54]. Later studies with conventional  
446 and super-resolution microscopy [40, 44, 55] showed that RDs with an average DNA content  
447 of 400–800 kb [56] can be optically resolved down to a few single replicons (150–200 kb)  
448 clustered per replication site. Similarly, the definition of TADs with a size range of ~0.1-1Mb  
449 (and further grouping into subTADs and metaTADs) has remained somewhat fuzzy, likely due  
450 to their dynamic behavior [57], differences of evaluation mode and interpretation [58, 59].

451 A recent review rejected the above hierarchy of metaTADs, TADs, and subTADs, and  
452 instead argued for a very different classification of contact domains into two types [60]:  
453 compartmental domains which originate due to the co-segregation of chromatin intervals with  
454 similar marks, and loop domains, which emerge from cohesin extrusion.

455 Critically, in our study, we report the maintenance of replication domains (RDs) in  
456 cohesin depleted nuclei over mitosis with re-formation of typical patterns for all S-phase stages  
457 in postmitotic MLN. Thus, replication domains remain despite the loss of all loop domains  
458 (whether classified as TADs, subTADs, metaTADs, etc). Instead, we find that the boundaries  
459 of replication domains align with the boundaries of compartmental domains. Thus, our work is  
460 consistent with the view that there are two types of domains. Compartmental domains, which  
461 do not depend on cohesin extrusion, correspond closely to replication domains. By contrast,  
462 loop domains, which result from cohesin extrusion, do not correspond to the boundaries of  
463 replication domains.

464

465 *Disappearance of loop domains and concomitant persistence of functional higher order*  
466 *chromatin arrangements underpins different mechanisms for their structural organization*

467 The disappearance of chromatin loops as basic chromatin folding structures demonstrated by  
468 Hi-C experiments may lead to the expectation of a profound effect on the global higher order  
469 chromatin organization, like a house of cards falling together when a basal card is removed.  
470 Apparently, this is not the case as has been previously shown by the maintenance and even  
471 strengthening of compartmentalization into A and B domains after cohesin depletion [18, 20].  
472 In the present study the persistence of compartment domains was also demonstrated for  
473 cultures highly enriched with postmitotic MLN.

474 Chromatin loop domains are formed by means of an extrusion mechanism where by  
475 the gradual expansion of a loop through a cohesin ring two opposite CTCF sites are tethered  
476 together and anchored at CTCF/cohesin binding sites (reviewed in [6, 61-64]). These anchor  
477 sites manifest as bright peaks in Hi-C maps. Based on cohesin depletion experiments this loop  
478 extrusion mechanism was shown to be cohesin dependent ([18, 20, 21] and this study).  
479 Elimination of cohesin dependent chromatin loop domains visualized in Hi-C maps by the  
480 respective disappearance of squares of enhanced contact frequencies does, however, not  
481 necessarily reflect a complete loss of chromatin loops. An effect of cohesin depletion on  
482 chromatin decompaction / relaxation with a modest increase of RD diameters as found in our  
483 present study may already result in a major decrease of 3D contact frequencies and contribute  
484 to the failure to detect loop domains. Our observation that replication foci become physically  
485 larger after cohesin depletion also suggests cohesin dependent extrusion may play a role in  
486 the physical compaction of replicating chromatin. This is consistent with a model where  
487 cohesin extrusion tends to compact intervals of replicating chromatin, but where their genomic  
488 boundaries are associated with compartmentalization [29].

489 Moreover, cohesin rings as chromatin loop anchors may in part be replaced after  
490 cohesin depletion by other factors with less defined anchor points (reviewed in [6, 7, 63]). The  
491 entrance of cells into mitosis provides a case in point for a structural change of chromatin loop  
492 organization which prompts a loss of the Hi-C plaid or check-board pattern in mitotic  
493 chromosomes [65]: upon entering mitosis, cohesin is lost from chromosome arms (reviewed  
494 in [1]) and helically arranged nested loop arrays are formed by condensins I and II. The  
495 organization of chromatids in mitosis can be described as a linearly organized, longitudinally

496 compressed array of consecutive chromatin loops [66]. Notwithstanding this major change of  
497 chromatin loop organization between interphase and mitosis, major features of higher order  
498 chromatin organization persist and are transmitted from one cell cycle to the next [67, 68].  
499 Chromatin loop clusters attributed to distinct CDs during interphase continue to be present in  
500 close spatial arrangements along mitotic chromosomes which allows the rapid re-  
501 establishment of loops, domains and compartments early in G1.

502 Cohesin-independent maintenance of Hi-C detectable A and B compartments was  
503 reported in several studies (reviewed in [22]). In line with only minor effects of cohesin depletion  
504 on gene expression [18], the present study underpins that mechanisms that direct the  
505 maintenance of individual RDs and their spatio-temporal order, as well as the spatial  
506 arrangement of higher order chromatin organization in the context of the ANC-INC model are  
507 also independent of cohesin and sufficient to instruct accurate reformation of these structures  
508 upon exit from mitosis into a subsequent cell cycle in the absence of cohesin. We argue that  
509 RDs correspond with compartment domains in line with [29] where discrete cis-regulatory  
510 elements which orchestrate domain-wide replication timing, A/B compartmentalization and  
511 loop architecture, were identified.

512

### 513 **An integrated view of the functional nuclear landscape based on Hi-C and microscopic** 514 **data**

515 Although microscopically derived distance maps were reported in excellent agreement with Hi-  
516 C maps [69], Hi-C and microscopy yield different views on the nuclear landscape and  
517 unexplored gaps between findings obtained with these approaches have to be closed. Hi-C  
518 has made possible the genome wide identification of the spatial proximity of DNA segments in  
519 cis and trans [12-14, 70] and genome wide data on chromatin modifications and architectural  
520 proteins mapped along the DNA can be easily integrated into the resulting architectural  
521 landscape. However, as a method based on 3D DNA-DNA contact frequencies Hi-C lacks the  
522 power to identify the system of IC-channels and the lining PR. These features have been  
523 demonstrated consistently in many cell types and species with super-resolved microscopy [24,  
524 25]. The relationship of compartments A and B identified by Hi-C with the co-aligned

525 compartments described by the ANC-INC model has not yet been clarified. Some studies  
526 traced genomic features within a range of few Mb with a combination of super-resolved  
527 microscopy and Hi-C [71, 72]. Using stochastic optical reconstruction microscopy, Bintu et al.  
528 [71] demonstrated domain-boundary-like structures in single cohesin depleted nuclei. Loss of  
529 cohesin, however, abolished preferential boundary sites with a corresponding loss of loop  
530 domains detectable by Hi-C at the population-average level in cohesin depleted cells.

531 Furthermore, Hi-C is not an appropriate method to measure absolute chromatin  
532 compaction. Simply put, Hi-C does not measure absolute contact frequency, and 3D  
533 reconstructions of higher order chromatin organization from Hi-C data have sometimes been  
534 used to argue for relatively open and accessible lariat-like chromatin loop structures [69, 73-  
535 76]. In contrast, recent studies using advanced microscopic strategies have suggested  
536 nucleosome clusters (NCs) as basic entities of chromatin organization beyond the nucleosome  
537 level [77-79]. Chromatin loops built from NCs imply more compacted and less accessible CDs  
538 with profound consequences for their accessibility for macromolecules (see below). Cartoons  
539 of 3D TAD structures [69, 73-76] suggest an unconstrained access of individual  
540 macromolecules, such as transcription factors, into the interior and also a constrained  
541 accessibility of macromolecular complexes. In contrast, we and others [80] consider the  
542 possibility that the accessibility of CDs may be impeded to an extent that the diffusion of  
543 individual macromolecules is constrained, and macromolecular complexes are fully excluded.  
544 We postulate that this basic organization is maintained in cohesin depleted nuclei.

545

## 546 **Outlook**

547 The polymer melt model of the CD structure proposed by Maeshima and colleagues [81]  
548 argues for dense packaging of ~10 nm thick chromatin fibers in the interior of CDs. Based on  
549 Monte Carlo simulations Maeshima et al. [80] proposed that nucleosome densities >0.3 to 0.5  
550 mM, corresponding to DNA densities of ~40 – 60 Mb/ $\mu\text{m}^3$ , result in an accessibility barrier for  
551 molecule complexes with diameters >20 – 25 nm. Estimates of DNA densities based on super-  
552 resolved microscopy of CDs in various human and mouse cell nuclei indicate a range in the  
553 order of 5 - 200 Mb/ $\mu\text{m}^3$  (C. Cremer, unpublished data). These estimates argue for an



554 exclusion of macromolecular complexes from the interior of CDs with higher compaction levels  
555 and thus favor models proposing that macromolecular complexes involved in transcription and  
556 other important nuclear functions act at the periphery of CDs [24, 25, 80, 82]. The implications  
557 of this model for the mobility of CDs and functional DNA targets have remained elusive. In line  
558 with current views of chromatin organization based on the formation of chromatin droplets with  
559 distinct chromatin states [60], a recent Hi-C based genome-wide model depicts contact  
560 domains and TADs as separated chromatin balls [83]. We have postulated that the IC may  
561 provide preferred routes for imported transcription factors to their target sites, for the  
562 intranuclear passage of regulatory RNAs to remote functional sites, and for export routes of  
563 mRNPs towards nuclear pores [25]. In order to test this hypothesis, it is necessary to explore  
564 the space-time compaction and accessibility of CDs. Super-resolved fluorescence microscopy,  
565 including single molecule localization microscopy (SMLM) and stochastic optical  
566 reconstruction microscopy (STORM), may become the methods of choice to measure absolute  
567 differences of DNA/chromatin compaction with spatial resolution at the nanometer scale [79,  
568 84, 85], whereas chromatin accessibility can be probed indirectly with methods that allow to  
569 measure molecular diffusion rates [86-89].

570

## 571 **Materials & Methods**

### 572 *Cells and culture conditions*

573 HCT116-RAD21-mAID-mClover cells (referred to as HCT116-RAD21-mAC cells in the  
574 manuscript) were generated and kindly provided by the Kanemaki lab (Mishima Shizuoka,  
575 Japan; [16]). For a detailed description see Suppl\_Fig. 1. Cells were cultured in McCoy's 5A  
576 medium supplemented with 10% FBS, 2 mM L-glutamine, 100 U/ml penicillin, and 100 µg/ml  
577 streptomycin at 37°C in 5% CO<sub>2</sub>.

578

### 579 *Auxin induced RAD21 proteolysis*

580 Degradation of the AID-tagged RAD21 was induced by addition of auxin (indole-3-acetic acid;  
581 IAA, Sigma Aldrich) to the medium at a final concentration of 500 µM (auxin stock solution 2  
582 M in DMSO). In long term cultures fresh auxin-medium was added after 20-24h.

583

### 584 *Immunodetection*



585 Cells were grown on high precision coverslips (Roth, LH22.1, #1.5) to 80% confluency and  
586 washed two times in PBS before fixing them in 2% formalin/PBS for 10 min. After a stepwise  
587 formalin exchange with PBS/Tween 0.02%, cells were permeabilized with 0.5% Triton X-  
588 100/PBST for 10 min and then incubated in 2% BSA/PBST as blocking solution for 1h to  
589 minimize non-specific antibody binding. For immunodetection, primary and secondary  
590 antibodies were diluted in blocking solution and incubated each for 1h in a dark humidified  
591 chamber to prevent drying and fluorescence fading. Primary antibodies against cohesin  
592 subunits RAD21, SMC1, SMC3 (Abcam), all raised in rabbit, were detected with Cy3-  
593 conjugated goat anti rabbit antibodies (Abcam). Primary antibodies against SC35 (Sigma),  
594 RNA Pol II (Abcam) and H3K27me3 (Active Motif) were detected with either donkey anti mouse  
595 Alexa 488 (Life technologies) or donkey anti rabbit Alexa 594 (Life technologies). A postfixation  
596 step in 4% formalin/PBS helped to stabilize bound antibodies. Cells were counterstained in 1  
597  $\mu\text{g/ml}$  DAPI, mounted in antifade mounting medium Vectashield (Vector Laboratories) and  
598 sealed with nail varnish (for details see [90]).

599

#### 600 *Replication pulse labeling*

601 *1. replication scratch labeling:* Cells cultivated on high precision coverslips (thickness 0.170  
602 mm) grown to 50-80% confluency were transferred into a dry empty tissue dish after draining  
603 off excess medium. 30  $\mu\text{l}$  of the prewarmed labeling solution (20  $\mu\text{M}$  Cy3-dUTP (homemade)  
604 or Alexa 594-5-dUTP (Life technologies)) was evenly distributed over the coverslip. With the  
605 tip of a hypodermic needle parallel scratches at distances of  $\sim 100 \mu\text{m}$  were quickly applied to  
606 the cell layer. Cells were incubated for 1 min in the incubator, then a few ml of pre-warmed  
607 medium was added to the dish. After 30 min medium was exchanged to remove non-  
608 incorporated nucleotides (for details see [42, 91]). Avoidance of any chemical treatments  
609 preserves the RAD21-mClover fluorescence after labeling and was therefore used for all RL  
610 experiments with exception for the labeling experiment shown in Fig. 6E.

611

#### 612 *2. Incorporation of 5-Ethynyl-dU (EdU) and detection by „click chemistry“*

613 This approach was used for RL in MLN since these cells are prone to detachment upon  
614 scratching (compare Fig. 6E) taking the degradation of the protein-tagged RAD21-mClover  
615 fluorescence caused by the acidic reaction [92]. EdU was added at a final concentration of 10  
616  $\mu\text{M}$  to the medium for 15min. Incorporated EdU was detected according to manufactures  
617 instructions (baseclick) by a Cu(I) catalyzed cycloaddition reaction that covalently attaches a  
618 fluorescent dye containing a reactive azide group to the ethynyl-group of the nucleotide [93].  
619 For visualization of RDs, the dye 6-FAM-Azide (baseclick) at a final concentration of 20  $\mu\text{M}$   
620 was used.

621 After either labeling approach cells were washed in 1xPBS and fixed with 4% formaldehyde /  
622 PBS for 10 min. After a stepwise exchange with PBST, cells were permeabilized with 0.5%

623 Triton X-100/PBS/Tween 0.02% for 10 min and washed again in 1xPBS. Cells were  
624 counterstained in 1 µg/ml DAPI and mounted in antifade mounting medium Vectashield (Vector  
625 Laboratories); for details see [90]).

626

#### 627 *Hi-C in situ analysis of untreated and auxin treated cells*

628 HCT-116-RAD21-mAC cells were plated in 6 well plates with either complete media, or  
629 complete media with 500uM auxin (IAA) for 6 hours (as in [22]) or 28 hours (to enrich for post-  
630 mitotic cells with multilobulated nuclei). Cells were crosslinked with 1% formaldehyde directly  
631 on the plate for 10 minutes and then quenched with glycine. The crosslinked cells were then  
632 scraped off and *in situ* Hi-C was performed as in [14]. In brief, cells were permeabilized with  
633 nuclei intact, the DNA was digested overnight with MboI, the 5'-overhangs were filled in while  
634 incorporating bio-dUTP, and the resulting blunt end fragments were ligated together.  
635 Crosslinks were then reversed overnight, the DNA was sheared to 300-500bp for Illumina  
636 sequencing, biotinylated ligation junctions were captured using streptavidin beads and then  
637 prepped for Illumina sequencing. We prepared 3 libraries (two biological replicates) each for  
638 each time point (untreated 6 hours, treated 6 hours, untreated 28 hours, treated 28 hours). All  
639 Hi-C data was processed using Juicer [94, 95]. The data was aligned against the hg19  
640 reference genome. All contact matrices used for further analysis were KR-normalized with  
641 Juicer. Comparison of compartment strengthening to histone modification clusters was done  
642 as in [22]. Histone modification data for 9 marks (H3K36me3, H3K27Ac, H3K4me1, H4K16Ac,  
643 H3K79me2, H2AZ, H4K20me3, H3K27me3, H3K9me3) generated from untreated and 6-hour  
644 treated cells in [22] was grouped into 6 clusters using k-means clustering. For the k-means  
645 clustering, the histone modification data was first converted into a z-score value for each mark  
646 in order to account for differences in the dynamic range between marks.

647

648

#### 649 *Repli-Seq of untreated or auxin-treated cells*

650 HCT116-RAD21-mAC cells were synchronized in G1 with lovastatin as previously described  
651 [96]. Briefly, cells were incubated with 20 µM Lovastatin (Mevinolin) (LKT Laboratories M1687)  
652 for 24 hours to synchronize in G1. 500 µM auxin or DMSO was added 6 hours before release  
653 from lovastatin block. To release from G1 block, lovastatin was washed away with 3 washes  
654 of PBS and warm media plus 2 mM Mevalonic acid (Sigma-Aldrich M4667) and 500 µM Auxin  
655 or DMSO. Cells were released for 10, 14, 18, and 22 hours. 2 hours before the time point 100  
656 µM BrdU was added to label nascent replication. After fixation, equal numbers of cells from  
657 each release time point were pooled together for early/late repli-seq processing [97]. Repli-  
658 Seq data was processed as described in [97]. In brief, data was aligned to the hg19 reference  
659 genome using bowtie2, deduplicated with samtools, and the log-2 ratio between early and late  
660 timepoints was calculated.

661

662

663 *3D DNA-FISH*

664 Hapten - or directly labeled chromosome painting probes delineating human chromosomes 4-  
665 (BIO), 12-(DIG) and 19-Cy3, generated from flow sorted chromosomes as previously  
666 described in detail [30] were kindly provided by Stefan Müller (LMU). 30 ng of each labeled  
667 probe and a 20-fold excess of COT-1 DNA was used per 1  $\mu$ l hybridization mix (50%  
668 formamide/ 2xSSC/ 10% dextran sulfate).

669 Cells were washed in 1xPBS and fixed with 4% formaldehyde/PBS for 10 min. After a stepwise  
670 exchange with 0.5% Triton X-100/PBS, cells were permeabilized with 0.5% Triton X-100/PBS  
671 for 10 min, washed in 1xPBS. Further pretreatment steps included incubation in 20% glycerol  
672 (1h), several freezing/thawing steps in liquid N<sub>2</sub>, and incubation in 0.1 N HCl (5 min). Cells  
673 were stored in 50% formamide/2xSSC overnight. After simultaneous denaturation of probe and  
674 cells (2 min at 76°C), hybridization was performed at 37°C for 48h. After stringent washing in  
675 0.1xSSC at 60°C, biotin was detected by streptavidin-Alexa 488 and DIG by a mouse-anti-DIG  
676 antibody conjugated to Cy5. Cells were counterstained in 1  $\mu$ g/ml DAPI, mounted in antifade  
677 mounting medium Vectashield (Vector Laboratories) and sealed with nail varnish (for details  
678 see [30]).

679

680 *DNA halo preparation*

681 HCT116-RAD21-mAC cells were incubated for 6h in 500  $\mu$ M auxin for cohesin depletion. DNA  
682 halo preparation was largely performed according to [98]. After washing the cells in 1xPBS  
683 they were incubated for 10 min in a buffer at 4°C containing 10 mM Tris pH 8, 3 mM MgCl<sub>2</sub>,  
684 0.1 M NaCl, 0.3 M sucrose, protease inhibitors (freshly added to the buffer prior to use) 1  $\mu$ M  
685 pepstatin A, 10  $\mu$ M E64, 1 mM AEBSF and 0.5% Nonidet P40. All the following procedures  
686 were performed at room temperature. Subsequently DNA was stained for 4 min with 2  $\mu$ g/ml  
687 DAPI. After 1 min in a second extraction buffer (25 mM Tris pH 8, 0.5 M NaCl, 0.2 mM MgCl<sub>2</sub>;  
688 protease inhibitors as in nuclei buffer and 1 mM PMSF were added fresh prior to use), cells  
689 were incubated 4 min in halo buffer (10 mM Tris pH 8, 2 M NaCl, 10 mM EDTA; protease  
690 inhibitors as in nuclei buffer and 1 mM DTT were added fresh prior to use). Eventually cells  
691 were washed 1 min each in two washing buffers (25 mM Tris pH 8, 0.2 mM MgCl<sub>2</sub>; the first  
692 buffer with and the second without 0.2 M NaCl). After 10 min fixation in 4% formaldehyde/PBS,  
693 cells were washed twice in 1xPBS, mounted on slides with Vectashield and sealed with nail  
694 varnish.

695 Nuclear scaffolds and the faded DNA halos were imaged at a widefield microscope (Zeiss  
696 Axioplan 2, 100x/1.30 NA Plan-Neofluar Oil Ph3 objective; Axiovision software; AxioCam mRM  
697 camera). Both the total area (At) and the scaffold area (As) of each cell were manually  
698 segmented using the software Fiji and the DNA halo area (Ah) calculated as a subtraction of

699 the two ( $A_h = A_t - A_s$ ). The DNA halo radius was subsequently derived with the formula  $R =$   
700  $\sqrt{(A_h/\pi)}$ . Four biological replicates were prepared and measured. For generation of plots and  
701 statistical analysis (Wilcoxon test) the software RStudio was used.

702

### 703 *Confocal fluorescence microscopy*

704 Confocal images were collected using a Leica SP8 confocal microscope equipped with a  
705 405nm excitation laser and a white light laser in combination with an acousto-optical beam  
706 splitter (AOBS) which allows tunable filtering of excitation from 470 to 670 nm and freely  
707 programmable emission detection. The used confocal system has three different detectors,  
708 one photomultiplier tube (PMT) and two hybrid photodetectors (HyD). The microscope was  
709 controlled by software from Leica (Leica Application Suite X, ver. 3.5.2.18963). For excitation  
710 of DAPI, the 405 nm laser was used. For excitation of Alexa488, Cy3, STAR635P and Cy5,  
711 the white light laser was set to 499, 554, 633 and 649 nm, respectively. The emission signal  
712 of DAPI was collected by the PMT (412-512 nm), the emission signals of Alexa488 (506-558  
713 nm), Cy3 (561-661 nm), STAR635P (640-750 nm) and Cy5 (656-780 nm) were collected by  
714 the two HyD detectors. Images were acquired with 42 nm pixel steps, 102  $\mu$ s pixel dwell time  
715 and 2-fold line accumulation using a Leica HC PL APO 63x/1.30 NA Glycerol immersion  
716 objective. The frame size was 37 x 37  $\mu$ m and the scan speed was 700 Hz. The size of the  
717 confocal pinhole was 1 A.U. Confocal image z-stacks were acquired with a step size of 330  
718 nm.

719

### 720 *Live cell microscopy for long term observations*

721 For live cell imaging, cells were plated on poly-L-Lysine-coated glass bottom 2-well imaging  
722 slides (ibidi), allowing to image control and auxin-treated conditions in parallel. For DNA  
723 staining cells were grown in media containing 500 nM SiR-DNA (Spirochrome) for 1h before  
724 imaging. Timelapse acquisitions were carried out on a Nikon TiE microscope equipped with a  
725 Yokogawa CSU-W1 spinning disk confocal unit (50  $\mu$ m pinhole size), an Andor Borealis  
726 illumination unit, Andor ALC600 laser beam combiner (405 nm / 488 nm / 561 nm / 640 nm),  
727 and Andor IXON 888 Ultra EMCCD camera. The microscope was controlled by software from  
728 Nikon (NIS Elements, ver. 5.02.00). Cells were imaged in an environmental chamber  
729 maintained at 37°C with 5% CO<sub>2</sub> (Oko Labs), using a Nikon PlanApo 60x/1.49 NA oil  
730 immersion objective and a Perfect Focus System (Nikon). Images were recorded every 15 min  
731 for 21h as z-stacks with two planes and a step size of 6  $\mu$ m, unbinned and with a pixel size of  
732 217 nm. For excitation of mClover and SiR-DNA, the 488 and 640 nm laser lines were used,  
733 respectively. Fiji software (ImageJ 1.51j) [99] was used to analyze images.

734

### 735 *Semi-automatic quantitative evaluation of multilobulated nuclei (MLN) / mitoses*

736 Image acquisitions were carried out on the Nikon spinning disk system described above. Using  
737 a Nikon PlanApo 100x/1.45 NA oil immersion objective tiled images (3x3 with 5% overlap and  
738 131 nm pixel size) were acquired for each condition to increase the number of cells per field  
739 of view. Confocal image z-stacks were acquired in two planes with a step size of 6  $\mu\text{m}$  in order  
740 to encompass cells, in particular mitotic cells, in different plane levels. DAPI and mClover were  
741 excited with 405 or 488 nm laser lines, respectively. All nuclei from each image (average 280  
742 nuclei per image frame) were classified visually into morphologically normal nuclei, mitoses  
743 and multilobulated nuclei (MLN). In auxin treated cells nuclei with persistent RAD21-mClover  
744 fluorescence (~2%) were excluded.

745

#### 746 *Structured illumination microscopy (SIM)*

747 Super-resolution structured illumination imaging was performed on a DeltaVision OMX V3  
748 system (Applied Precision Imaging/GE Healthcare) equipped with a 100x/1.4 NA UPlan S Apo  
749 oil immersion objective (Olympus), Cascade II:512 EMCCD cameras (Photometrics) and 405,  
750 488 and 593 nm lasers (for detailed description see [100]). For sample acquisition oil with a  
751 refractive index of  $RI=1.512$  was used. 3D image stacks were acquired with 15 raw images per  
752 plane (5 phases, 3 angles) and an axial distance of 125 nm and then computationally  
753 reconstructed (Wiener filter setting of 0.002, channel specific optical transfer functions (OTFs))  
754 and color shift corrected using the SoftWoRx software (Applied Precision Imaging/GE  
755 Healthcare). After establishing 32-bit composite tiff stacks with a custom-made macro in  
756 Fiji/ImageJ2 (<http://rsb.info.nih.gov/ij/>), the data were subsequently aligned again to get a higher  
757 alignment precision. These images were then used for measurements in the Volocity software  
758 (Perkin Elmer).

759

#### 760 *Segmentation and quantification of replication domain (RD) signals*

761 Aligned 3D SIM image stacks were used as RGB for object counting and volume  
762 measurements in the Volocity software. For each series between  $n=7$  and  $n=11$  nuclei were  
763 measured. The image stacks were separated in their respective channels and then structures  
764 were obtained and segmented separately. The segmentation of cohesin structures was  
765 performed with the following software commands: 1. "Find Objects" (Threshold using: Intensity,  
766 Lower: 32, Upper: 255), 2. "Separate Touching Objects" (Object size guide of  $0,002 \mu\text{m}^3$ ) and  
767 3. "Exclude Objects by Size", excluding structures  $< 0,005 \mu\text{m}^3$ . Exclusion of signals outside a  
768 selected nucleus was achieved by the commands "Intersect" and "Compartmentalize".  
769 Segmentation of nuclei was realized by the following commands: 1. "Find Objects" (Threshold  
770 using: Intensity), 2. "Dilate", 3. "Fill Holes in Objects" and 4. "Erode". Measured values for  
771 volumes and object counts were plotted as histograms using bins for volume classes ( $0,01-0,4$   
772  $\mu\text{m}^3$ ) and object counts within each bin. To compare different series, averaged values from all  
773 nuclei of a given series were used. To confirm statistically significance the Mann-Whitney test



774 was applied for both object counts and volumes. For comparability of the results, the same  
775 protocol was applied for all conditions

776

#### 777 *Chromatin compaction classification by 3D assessment of DAPI intensity classes*

778 Nuclei voxels were identified automatically from the DAPI channel intensities using Gaussian  
779 filtering and automatic threshold determination. For chromatin quantification a 3D mask was  
780 generated in ImageJ to define the nuclear space considered for the segmentation of DAPI  
781 signals into seven classes with equal intensity variance by a previously described in house  
782 algorithm [34], available on request. Briefly, a hidden Markov random field model classification  
783 was used, combining a finite Gaussian mixture model with a spatial model (Potts model),  
784 implemented in the statistics software R [101, 102]. This approach allows threshold-  
785 independent signal intensity classification at the voxel level, based on the intensity of an  
786 individual voxel. Color or gray value heatmaps of the seven intensity classes in individual nuclei  
787 were performed in ImageJ.

788

#### 789 *Quantitative allocation of defined nuclear targets on 3D chromatin compaction classes*

790 Individual voxels of fluorescent signals of the respective marker channels were segmented  
791 using a semi-automatic thresholding algorithm (using custom built scripts for the open-source  
792 statistical software R <http://www.r-project.org>, available on request). XYZ-coordinates of  
793 segmented voxels were mapped to the seven DNA intensity classes. The relative frequency  
794 of intensity weighted signals mapped on each DAPI intensity class was used to calculate the  
795 relative distribution of signals over chromatin classes. For each studied nucleus the total  
796 number of voxels counted for each intensity class and the total number of voxels identified for  
797 the respective fluorescent signals for SC35, RNA Pol II, H3K27me3 was set to 1. As an  
798 estimate of over/under representations (relative depletion/enrichment) of marker signals in the  
799 respective intensity classes, we calculated the difference between the percentage points  
800 obtained for the fraction of voxels for a given DAPI intensity class and the corresponding  
801 fraction of voxels calculated for the respective signals. Calculations were performed on single  
802 cell level and average values over all nuclei used for evaluation and plotting. For a detailed  
803 description see [34].

804

805

#### 806 **Acknowledgments**

807 We thank Stefan Müller, University of Munich (LMU), for kindly providing labeled chromosome  
808 painting probes for 3D-FISH experiments and Irina Solovei, University of Munich (LMU), for  
809 generously providing antibodies, lab space and facilities to MC. We are most grateful to  
810 Toyooki Natsume from the lab of Masato Kanemaki (Center of Frontier Research, National  
811 Institute of Genetics, Mishima, Shizuoka Japan) for providing HCT116-RAD21-mAC cells. KB

812 was supported by the International Max Plank Research School for Molecular Life Sciences  
813 (IMPRS-LS). Microscopic images were acquired at microscopes of the Center for Advanced  
814 Light Microscopy (CALM) at the LMU Munich.  
815  
816

## 817 **References**

- 818 1. Jeppsson K, Kanno T, Shirahige K, Sjogren C: **The maintenance of chromosome structure:**  
819 **positioning and functioning of SMC complexes.** *Nat Rev Mol Cell Biol* 2014, **15**:601-614.
- 820 2. Mehta GD, Kumar R, Srivastava S, Ghosh SK: **Cohesin: functions beyond sister chromatid**  
821 **cohesion.** *FEBS Lett* 2013, **587**:2299-2312.
- 822 3. Nasmyth K, Haering CH: **Cohesin: its roles and mechanisms.** *Annu Rev Genet* 2009, **43**:525-  
823 558.
- 824 4. Nishiyama T: **Cohesion and cohesin-dependent chromatin organization.** *Curr Opin Cell Biol*  
825 2019, **58**:8-14.
- 826 5. Peters JM, Tedeschi A, Schmitz J: **The cohesin complex and its roles in chromosome**  
827 **biology.** *Genes Dev* 2008, **22**:3089-3114.
- 828 6. van Ruiten MS, Rowland BD: **SMC Complexes: Universal DNA Looping Machines with**  
829 **Distinct Regulators.** *Trends Genet* 2018, **34**:477-487.
- 830 7. Yuen KC, Gerton JL: **Taking cohesin and condensin in context.** *PLoS Genet* 2018,  
831 **14**:e1007118.
- 832 8. Parelho V, Hadjur S, Spivakov M, Leleu M, Sauer S, Gregson HC, Jarmuz A, Canzonetta C,  
833 Webster Z, Nesterova T, et al: **Cohesins functionally associate with CTCF on mammalian**  
834 **chromosome arms.** *Cell* 2008, **132**:422-433.
- 835 9. Wendt KS, Yoshida K, Itoh T, Bando M, Koch B, Schirghuber E, Tsutsumi S, Nagae G, Ishihara  
836 K, Mishihiro T, et al: **Cohesin mediates transcriptional insulation by CCCTC-binding factor.**  
837 *Nature* 2008, **451**:796-801.
- 838 10. Rao SS, Huntley MH, Durand NC, Stamenova EK, Bochkov ID, Robinson JT, Sanborn AL,  
839 Machol I, Omer AD, Lander ES, Aiden EL: **A 3D map of the human genome at kilobase**  
840 **resolution reveals principles of chromatin looping.** *Cell* 2014, **159**:1665-1680.
- 841 11. Sofueva S, Yaffe E, Chan WC, Georgopoulou D, Vietri Rudan M, Mira-Bontenbal H, Pollard  
842 SM, Schroth GP, Tanay A, Hadjur S: **Cohesin-mediated interactions organize chromosomal**  
843 **domain architecture.** *EMBO J* 2013, **32**:3119-3129.
- 844 12. Dixon JR, Selvaraj S, Yue F, Kim A, Li Y, Shen Y, Hu M, Liu JS, Ren B: **Topological domains**  
845 **in mammalian genomes identified by analysis of chromatin interactions.** *Nature* 2012,  
846 **485**:376-380.
- 847 13. Lieberman-Aiden E, van Berkum NL, Williams L, Imakaev M, Ragoczy T, Telling A, Amit I, Lajoie  
848 BR, Sabo PJ, Dorschner MO, et al: **Comprehensive mapping of long-range interactions**  
849 **reveals folding principles of the human genome.** *Science* 2009, **326**:289-293.
- 850 14. Dixon JR, Gorkin DU, Ren B: **Chromatin Domains: The Unit of Chromosome Organization.**  
851 *Mol Cell* 2016, **62**:668-680.
- 852 15. Szabo Q, Jost D, Chang JM, Cattoni DI, Papadopoulos GL, Bonev B, Sexton T, Gurgo J,  
853 Jacquier C, Nollmann M, et al: **TADs are 3D structural units of higher-order chromosome**  
854 **organization in Drosophila.** *Sci Adv* 2018, **4**:eaar8082.
- 855 16. Natsume T, Kiyomitsu T, Saga Y, Kanemaki MT: **Rapid Protein Depletion in Human Cells by**  
856 **Auxin-Inducible Degron Tagging with Short Homology Donors.** *Cell Rep* 2016, **15**:210-  
857 218.
- 858 17. Natsume T, Kanemaki MT: **Conditional Degrons for Controlling Protein Expression at the**  
859 **Protein Level.** *Annu Rev Genet* 2017, **51**:83-102.
- 860 18. Rao SSP, Huang SC, Glenn St Hilaire B, Engreitz JM, Perez EM, Kieffer-Kwon KR, Sanborn  
861 AL, Johnstone SE, Bascom GD, Bochkov ID, et al: **Cohesin Loss Eliminates All Loop**  
862 **Domains.** *Cell* 2017, **171**:305-320 e324.
- 863 19. Gassler J, Brandao HB, Imakaev M, Flyamer IM, Ladstatter S, Bickmore WA, Peters JM, Mirny  
864 LA, Tachibana K: **A mechanism of cohesin-dependent loop extrusion organizes zygotic**  
865 **genome architecture.** *EMBO J* 2017, **36**:3600-3618.
- 866 20. Schwarzer W, Abdennur N, Goloborodko A, Pekowska A, Fudenberg G, Loe-Mie Y, Fonseca  
867 NA, Huber W, Haering CH, Mirny L, Spitz F: **Two independent modes of chromatin**  
868 **organization revealed by cohesin removal.** *Nature* 2017, **551**:51-56.
- 869 21. Wutz G, Varnai C, Nagasaka K, Cisneros DA, Stocsits RR, Tang W, Schoenfelder S, Jessberger  
870 G, Muhar M, Hossain MJ, et al: **Topologically associating domains and chromatin loops**  
871 **depend on cohesin and are regulated by CTCF, WAPL, and PDS5 proteins.** *EMBO J* 2017,  
872 **36**:3573-3599.
- 873 22. Haarhuis JH, Rowland BD: **Cohesin: building loops, but not compartments.** *EMBO J* 2017,  
874 **36**:3549-3551.
- 875 23. Cremer M, Cremer T: **Nuclear compartmentalization, dynamics, and function of regulatory**  
876 **DNA sequences.** *Genes Chromosomes Cancer* 2019, **58**:427-436.



- 877 24. Cremer T, Cremer M, Hubner B, Strickfaden H, Smeets D, Popken J, Sterr M, Markaki Y, Rippe  
878 K, Cremer C: **The 4D nucleome: Evidence for a dynamic nuclear landscape based on co-**  
879 **aligned active and inactive nuclear compartments.** *FEBS Lett* 2015, **589**:2931-2943.
- 880 25. Cremer T, Strickfaden H, Cremer M, Hübner B, Silahtaroglu A, Hendzel M, Lanctot C, Cremer  
881 C: **Functional nuclear organization: The interchromatin compartment is shaped by**  
882 **dynamic chromatin arrangements.** *BioEssays*, in press 2019.
- 883 26. Rouquette J, Cremer C, Cremer T, Fakan S: **Functional nuclear architecture studied by**  
884 **microscopy: present and future.** *Int Rev Cell Mol Biol* 2010, **282**:1-90.
- 885 27. Pope BD, Ryba T, Dileep V, Yue F, Wu W, Denas O, Vera DL, Wang Y, Hansen RS, Canfield  
886 TK, et al: **Topologically associating domains are stable units of replication-timing**  
887 **regulation.** *Nature* 2014, **515**:402-405.
- 888 28. Oldach P, Nieduszynski CA: **Cohesin-Mediated Genome Architecture Does Not Define DNA**  
889 **Replication Timing Domains.** *Genes (Basel)* 2019, **10**.
- 890 29. Sima J, Chakraborty A, Dileep V, Michalski M, Klein KN, Holcomb NP, Turner JL, Paulsen MT,  
891 Rivera-Mulia JC, Trevilla-Garcia C, et al: **Identifying cis Elements for Spatiotemporal**  
892 **Control of Mammalian DNA Replication.** *Cell* 2019, **176**:816-830 e818.
- 893 30. Cremer M, Grasser F, Lanctot C, Muller S, Neusser M, Zinner R, Solovei I, Cremer T: **Multicolor**  
894 **3D fluorescence in situ hybridization for imaging interphase chromosomes.** *Methods Mol*  
895 *Biol* 2008, **463**:205-239.
- 896 31. Jevtic P, Edens LJ, Vukovic LD, Levy DL: **Sizing and shaping the nucleus: mechanisms and**  
897 **significance.** *Curr Opin Cell Biol* 2014, **28**:16-27.
- 898 32. Langer S, Geigl JB, Ehnle S, Gangnus R, Speicher MR: **Live cell catapulting and**  
899 **recultivation does not change the karyotype of HCT116 tumor cells.** *Cancer Genet*  
900 *Cytogenet* 2005, **161**:174-177.
- 901 33. Melcher R, Koehler S, Steinlein C, Schmid M, Mueller CR, Luehrs H, Menzel T, Scheppach W,  
902 Moerk H, Scheurlen M, et al: **Spectral karyotype analysis of colon cancer cell lines of the**  
903 **tumor suppressor and mutator pathway.** *Cytogenet Genome Res* 2002, **98**:22-28.
- 904 34. Schmid VJ, Cremer M, Cremer T: **Quantitative analyses of the 3D nuclear landscape**  
905 **recorded with super-resolved fluorescence microscopy.** *Methods* 2017, **123**:33-46.
- 906 35. Lin S, Coutinho-Mansfield G, Wang D, Pandit S, Fu XD: **The splicing factor SC35 has an**  
907 **active role in transcriptional elongation.** *Nat Struct Mol Biol* 2008, **15**:819-826.
- 908 36. Spector DL, Lamond AI: **Nuclear speckles.** *Cold Spring Harb Perspect Biol* 2011, **3**.
- 909 37. Egloff S, Murphy S: **Cracking the RNA polymerase II CTD code.** *Trends Genet* 2008, **24**:280-  
910 288.
- 911 38. Zhou VW, Goren A, Bernstein BE: **Charting histone modifications and the functional**  
912 **organization of mammalian genomes.** *Nat Rev Genet* 2011, **12**:7-18.
- 913 39. Dimitrova DS, Berezney R: **The spatio-temporal organization of DNA replication sites is**  
914 **identical in primary, immortalized and transformed mammalian cells.** *J Cell Sci* 2002,  
915 **115**:4037-4051.
- 916 40. Chagin VO, Stear JH, Cardoso MC: **Organization of DNA replication.** *Cold Spring Harb*  
917 *Perspect Biol* 2010, **2**:a000737.
- 918 41. Jackson DA, Pombo A: **Replicon clusters are stable units of chromosome structure:**  
919 **evidence that nuclear organization contributes to the efficient activation and propagation**  
920 **of S phase in human cells.** *J Cell Biol* 1998, **140**:1285-1295.
- 921 42. Schermelleh L, Solovei I, Zink D, Cremer T: **Two-color fluorescence labeling of early and**  
922 **mid-to-late replicating chromatin in living cells.** *Chromosome Res* 2001, **9**:77-80.
- 923 43. Zink D, Bornfleth H, Visser A, Cremer C, Cremer T: **Organization of early and late replicating**  
924 **DNA in human chromosome territories.** *Exp Cell Res* 1999, **247**:176-188.
- 925 44. Xiang W, Roberti MJ, Heriche JK, Huet S, Alexander S, Ellenberg J: **Correlative live and**  
926 **super-resolution imaging reveals the dynamic structure of replication domains.** *J Cell Biol*  
927 2018, **217**:1973-1984.
- 928 45. Heng HH, Goetze S, Ye CJ, Liu G, Stevens JB, Bremer SW, Wykes SM, Bode J, Krawetz SA:  
929 **Chromatin loops are selectively anchored using scaffold/matrix-attachment regions.** *J*  
930 *Cell Sci* 2004, **117**:999-1008.
- 931 46. Diaz-Martinez LA, Beauchene NA, Furniss K, Esponda P, Gimenez-Abian JF, Clarke DJ:  
932 **Cohesin is needed for bipolar mitosis in human cells.** *Cell Cycle* 2010, **9**:1764-1773.
- 933 47. Hintermair C, Voss K, Forne I, Heidemann M, Flatley A, Kremmer E, Imhof A, Eick D: **Specific**  
934 **threonine-4 phosphorylation and function of RNA polymerase II CTD during M phase**  
935 **progression.** *Sci Rep* 2016, **6**:27401.
- 936 48. Giebel B, Punzel M: **Lineage development of hematopoietic stem and progenitor cells.** *Biol*  
937 *Chem* 2008, **389**:813-824.

- 938 49. Joos S, Granzow M, Holtgreve-Grez H, Siebert R, Harder L, Martin-Subero JI, Wolf J,  
939 Adamowicz M, Barth TF, Lichter P, Jauch A: **Hodgkin's lymphoma cell lines are**  
940 **characterized by frequent aberrations on chromosomes 2p and 9p including REL and**  
941 **JAK2.** *Int J Cancer* 2003, **103**:489-495.
- 942 50. Takaki T, Montagner M, Serres MP, Le Berre M, Russell M, Collinson L, Szuhai K, Howell M,  
943 Boulton SJ, Sahai E, Petronczki M: **Actomyosin drives cancer cell nuclear dysmorphia and**  
944 **threatens genome stability.** *Nat Commun* 2017, **8**:16013.
- 945 51. Zwerger M, Ho CY, Lammerding J: **Nuclear mechanics in disease.** *Annu Rev Biomed Eng*  
946 2011, **13**:397-428.
- 947 52. Moindrot B, Audit B, Klous P, Baker A, Thermes C, de Laat W, Bouvet P, Mongelard F, Arneodo  
948 A: **3D chromatin conformation correlates with replication timing and is conserved in**  
949 **resting cells.** *Nucleic Acids Res* 2012, **40**:9470-9481.
- 950 53. Zhao PA, Rivera-Mulia JC, Gilbert DM: **Replication Domains: Genome**  
951 **Compartmentalization into Functional Replication Units.** *Adv Exp Med Biol* 2017,  
952 **1042**:229-257.
- 953 54. Nakamura H, Morita T, Sato C: **Structural organizations of replicon domains during DNA**  
954 **synthetic phase in the mammalian nucleus.** *Exp Cell Res* 1986, **165**:291-297.
- 955 55. Baddeley D, Chagin VO, Schermelleh L, Martin S, Pombo A, Carlton PM, Gahl A, Domaing P,  
956 Birk U, Leonhardt H, et al: **Measurement of replication structures at the nanometer scale**  
957 **using super-resolution light microscopy.** *Nucleic Acids Res* 2010, **38**:e8.
- 958 56. Marchal C, Sima J, Gilbert DM: **Control of DNA replication timing in the 3D genome.** *Nat*  
959 *Rev Mol Cell Biol* 2019.
- 960 57. Hansen AS, Cattoglio C, Darzacq X, Tjian R: **Recent evidence that TADs and chromatin**  
961 **loops are dynamic structures.** *Nucleus* 2018, **9**:20-32.
- 962 58. Wang XT, Dong PF, Zhang HY, Peng C: **Structural heterogeneity and functional diversity**  
963 **of topologically associating domains in mammalian genomes.** *Nucleic Acids Res* 2015,  
964 **43**:7237-7246.
- 965 59. Zhan Y, Mariani L, Barozzi I, Schulz EG, Bluthgen N, Stadler M, Tiana G, Giorgetti L:  
966 **Reciprocal insulation analysis of Hi-C data shows that TADs represent a functionally but**  
967 **not structurally privileged scale in the hierarchical folding of chromosomes.** *Genome Res*  
968 2017, **27**:479-490.
- 969 60. Rowley MJ, Corces VG: **Organizational principles of 3D genome architecture.** *Nat Rev*  
970 *Genet* 2018, **19**:789-800.
- 971 61. Barrington C, Finn R, Hadjur S: **Cohesin biology meets the loop extrusion model.**  
972 *Chromosome Res* 2017, **25**:51-60.
- 973 62. Fudenberg G, Abdennur N, Imakaev M, Goloborodko A, Mirny LA: **Emerging Evidence of**  
974 **Chromosome Folding by Loop Extrusion.** *Cold Spring Harb Symp Quant Biol* 2017, **82**:45-  
975 55.
- 976 63. Nuebler J, Fudenberg G, Imakaev M, Abdennur N, Mirny LA: **Chromatin organization by an**  
977 **interplay of loop extrusion and compartmental segregation.** *Proc Natl Acad Sci U S A* 2018,  
978 **115**:E6697-E6706.
- 979 64. Richterova J, Huraiova B, Gregan J: **Genome Organization: Cohesin on the Move.** *Mol Cell*  
980 2017, **66**:444-445.
- 981 65. Naumova N, Imakaev M, Fudenberg G, Zhan Y, Lajoie BR, Mirny LA, Dekker J: **Organization**  
982 **of the mitotic chromosome.** *Science* 2013, **342**:948-953.
- 983 66. Gibcus JH, Samejima K, Goloborodko A, Samejima I, Naumova N, Nuebler J, Kanemaki MT,  
984 Xie L, Paulson JR, Earnshaw WC, et al: **A pathway for mitotic chromosome formation.**  
985 *Science* 2018, **359**.
- 986 67. Bernardi G: **Genome Organization and Chromosome Architecture.** *Cold Spring Harb Symp*  
987 *Quant Biol* 2015, **80**:83-91.
- 988 68. Jabbari K, Bernardi G: **An Isochore Framework Underlies Chromatin Architecture.** *PLoS*  
989 *One* 2017, **12**:e0168023.
- 990 69. Mirny LA, Imakaev M, Abdennur N: **Two major mechanisms of chromosome organization.**  
991 *Curr Opin Cell Biol* 2019, **58**:142-152.
- 992 70. Sexton T, Yaffe E, Kenigsberg E, Bantignies F, Leblanc B, Hoichman M, Parrinello H, Tanay A,  
993 Cavalli G: **Three-dimensional folding and functional organization principles of the**  
994 **Drosophila genome.** *Cell* 2012, **148**:458-472.
- 995 71. Bintu B, Mateo LJ, Su JH, Sinnott-Armstrong NA, Parker M, Kinrot S, Yamaya K, Boettiger AN,  
996 Zhuang X: **Super-resolution chromatin tracing reveals domains and cooperative**  
997 **interactions in single cells.** *Science* 2018, **362**.

- 998 72. Nir G, Farabella I, Perez Estrada C, Ebeling CG, Beliveau BJ, Sasaki HM, Lee SD, Nguyen SC,  
999 McCole RB, Chatteraj S, et al: **Walking along chromosomes with super-resolution imaging,  
1000 contact maps, and integrative modeling.** *PLoS Genet* 2018, **14**:e1007872.
- 1001 73. Dekker J, Belmont AS, Guttman M, Leshyk VO, Lis JT, Lomvardas S, Mirny LA, O'Shea CC,  
1002 Park PJ, Ren B, et al: **The 4D nucleome project.** *Nature* 2017, **549**:219-226.
- 1003 74. Finn EH, Pegoraro G, Brandao HB, Valton AL, Oomen ME, Dekker J, Mirny L, Misteli T:  
1004 **Extensive Heterogeneity and Intrinsic Variation in Spatial Genome Organization.** *Cell*  
1005 2019, **176**:1502-1515 e1510.
- 1006 75. Krumm A, Duan Z: **Understanding the 3D genome: Emerging impacts on human disease.**  
1007 *Semin Cell Dev Biol* 2019, **90**:62-77.
- 1008 76. Szabo Q, Bantignies F, Cavalli G: **Principles of genome folding into topologically  
1009 associating domains.** *Sci Adv* 2019, **5**:eaaw1668.
- 1010 77. Otterstrom J, Castells-Garcia A, Vicario C, Gomez-Garcia PA, Cosma MP, Lakadamyali M:  
1011 **Super-resolution microscopy reveals how histone tail acetylation affects DNA  
1012 compaction within nucleosomes in vivo.** *Nucleic Acids Res* 2019.
- 1013 78. Ricci MA, Manzo C, Garcia-Parajo MF, Lakadamyali M, Cosma MP: **Chromatin fibers are  
1014 formed by heterogeneous groups of nucleosomes in vivo.** *Cell* 2015, **160**:1145-1158.
- 1015 79. Xu J, Liu Y: **A guide to visualizing the spatial epigenome with super-resolution  
1016 microscopy.** *FEBS J* 2019.
- 1017 80. Maeshima K, Kaizu K, Tamura S, Nozaki T, Kokubo T, Takahashi K: **The physical size of  
1018 transcription factors is key to transcriptional regulation in chromatin domains.** *J Phys  
1019 Condens Matter* 2015, **27**:064116.
- 1020 81. Maeshima K, Ide S, Babokhov M: **Dynamic chromatin organization without the 30-nm fiber.**  
1021 *Curr Opin Cell Biol* 2019, **58**:95-104.
- 1022 82. Maeshima K, Rogge R, Tamura S, Joti Y, Hikima T, Szerlong H, Krause C, Herman J, Seidel  
1023 E, DeLuca J, et al: **Nucleosomal arrays self-assemble into supramolecular globular  
1024 structures lacking 30-nm fibers.** *EMBO J* 2016, **35**:1115-1132.
- 1025 83. Paulsen J, Liyakat Ali TM, Nekrasov M, Delbarre E, Baudement MO, Kurscheid S, Tremethick  
1026 D, Collas P: **Long-range interactions between topologically associating domains shape  
1027 the four-dimensional genome during differentiation.** *Nat Genet* 2019, **51**:835-843.
- 1028 84. Nmezi B, Xu J, Fu R, Armiger TJ, Rodriguez-Bey G, Powell JS, Ma H, Sullivan M, Tu Y, Chen  
1029 NY, et al: **Concentric organization of A- and B-type lamins predicts their distinct roles  
1030 in the spatial organization and stability of the nuclear lamina.** *Proc Natl Acad Sci U S A* 2019.
- 1031 85. Szczurek A, Klewes L, Xing J, Gourram A, Birk U, Knecht H, Dobrucki JW, Mai S, Cremer C:  
1032 **Imaging chromatin nanostructure with binding-activated localization microscopy based  
1033 on DNA structure fluctuations.** *Nucleic Acids Res* 2017, **45**:e56.
- 1034 86. Lleres D, Bailly AP, Perrin A, Norman DG, Xirodimas DP, Feil R: **Quantitative FLIM-FRET  
1035 Microscopy to Monitor Nanoscale Chromatin Compaction In Vivo Reveals Structural  
1036 Roles of Condensin Complexes.** *Cell Rep* 2017, **18**:1791-1803.
- 1037 87. Lou J, Scipioni L, Wright BK, Bartolec TK, Zhang J, Masamsetti VP, Gaus K, Gratton E, Cesare  
1038 AJ, Hinde E: **Phasor histone FLIM-FRET microscopy quantifies spatiotemporal  
1039 rearrangement of chromatin architecture during the DNA damage response.** *Proc Natl  
1040 Acad Sci U S A* 2019, **116**:7323-7332.
- 1041 88. Pelicci S, Diaspro A, Lanzano L: **Chromatin nanoscale compaction in live cells visualized  
1042 by acceptor-to-donor ratio corrected Forster resonance energy transfer between DNA  
1043 dyes.** *J Biophotonics* 2019:e201900164.
- 1044 89. Priest DG, Solano A, Lou J, Hinde E: **Fluorescence fluctuation spectroscopy: an invaluable  
1045 microscopy tool for uncovering the biophysical rules for navigating the nuclear  
1046 landscape.** *Biochem Soc Trans* 2019, **47**:1117-1129.
- 1047 90. Markaki Y, Smeets D, Cremer M, Schermelleh L: **Fluorescence in situ hybridization  
1048 applications for super-resolution 3D structured illumination microscopy.** *Methods Mol  
1049 Biol* 2013, **950**:43-64.
- 1050 91. Schermelleh L: **In Vivo DNA replication labeling.** *Cell Biology - a laboratory handbook* 2006,  
1051 **3rd edition volume 1**, editor J.E. Celis, Elsevier Academic Press
- 1052 92. Clarke ST, Song Z, Kwan KY, DeMarco C, Rukavishnikov A, Singh U, Gee K: **GFP  
1053 compatibility with EdU cell proliferation assay.** DOI: 101158/1538-7445AM2014-5098 2014.
- 1054 93. Salic A, Mitchison TJ: **A chemical method for fast and sensitive detection of DNA synthesis  
1055 in vivo.** *Proc Natl Acad Sci U S A* 2008, **105**:2415-2420.
- 1056 94. Durand NC, Robinson JT, Shamim MS, Machol I, Mesirov JP, Lander ES, Aiden EL: **Juicebox  
1057 Provides a Visualization System for Hi-C Contact Maps with Unlimited Zoom.** *Cell Syst*  
1058 2016, **3**:99-101.

- 1059 95. Durand NC, Shamim MS, Machol I, Rao SS, Huntley MH, Lander ES, Aiden EL: **Juicer**  
1060 **Provides a One-Click System for Analyzing Loop-Resolution Hi-C Experiments.** *Cell Syst*  
1061 2016, **3**:95-98.
- 1062 96. Javanmoghadam-Kamrani S, Keyomarsi K: **Synchronization of the cell cycle using**  
1063 **lovastatin.** *Cell Cycle* 2008, **7**:2434-2440.
- 1064 97. Marchal C, Sasaki T, Vera D, Wilson K, Sima J, Rivera-Mulia JC, Trevilla-Garcia C, Nogues C,  
1065 Nafie E, Gilbert DM: **Genome-wide analysis of replication timing by next-generation**  
1066 **sequencing with E/L Repli-seq.** *Nat Protoc* 2018, **13**:819-839.
- 1067 98. Guillou E, Ibarra A, Coulon V, Casado-Vela J, Rico D, Casal I, Schwob E, Losada A, Mendez  
1068 J: **Cohesin organizes chromatin loops at DNA replication factories.** *Genes Dev* 2010,  
1069 **24**:2812-2822.
- 1070 99. Schindelin J, Arganda-Carreras I, Frise E, Kaynig V, Longair M, Pietzsch T, Preibisch S, Rueden  
1071 C, Saalfeld S, Schmid B, et al: **Fiji: an open-source platform for biological-image analysis.**  
1072 *Nat Methods* 2012, **9**:676-682.
- 1073 100. Dobbie IM, King E, Parton RM, Carlton PM, Sedat JW, Swedlow JR, Davis I: **OMX: a new**  
1074 **platform for multimodal, multichannel wide-field imaging.** *Cold Spring Harb Protoc* 2011,  
1075 **2011**:899-909.
- 1076 101. Pau G, Fuchs F, Sklyar O, Boutros M, Huber W: **EImage--an R package for image**  
1077 **processing with applications to cellular phenotypes.** *Bioinformatics* 2010, **26**:979-981.
- 1078 102. R Core Team: **R: A language and environment for statistical computing.** In *Book R: A*  
1079 *language and environment for statistical computing* (Editor ed.^eds.). City: R Foundation for  
1080 Statistical Computing, Vienna, Austria; 2013.

### 1081 **Authors contributions**

1082  
1083 TC and ELA initiated the study; MC and TC conceived the microscopic experiments together with HH;  
1084 KB, MC and AM performed experiments shown in Figs. 1- 4,6 - 7 and Suppl. Figs. 2- 4. AM and KB  
1085 performed live cell and super-resolution/confocal microscopy; HH provided input on quantitative image  
1086 analysis, including statistical analysis; AM performed segmentation analyses and VS 3D image analyses  
1087 for chromatin density mapping data; SM performed DNA Halo experiments with support of MCC. Hi-C  
1088 data were generated by SSPR and ELA with experimental support of NM (Fig. 5). Repli-Seq data were  
1089 provided by DMG and KNK. HL provided input for the 3D imaging part and MCC for the replication part.  
1090 MC and TC wrote the manuscript with support from all authors, in particular from ELA.  
1091

### 1092 **Competing interests**

1093 The authors declare to have no competing interests.  
1094

### 1095 **Availability of supporting data**

1096 All data generated or analyzed during this study are included in this published  
1097 article and its Additional files.  
1098

### 1099 **Consent for publication**

1100 All authors read and approved the manuscript.  
1101

### 1102 **Ethical approval and consent to participate**

1103 Not applicable  
1104

### 1105 **Funding**

1106  
1107 This work was supported by grants of the Deutsche Forschungsgemeinschaft (GRK1657/TP1C and  
1108 CA198/9-2) to MCC and by the DFG Priority Programm SPP 2202 to HH and HL. ELA was supported  
1109 by an NSF Physics Frontiers Center Award (PHY1427654), the Welch Foundation (Q-1866), a USDA  
1110 Agriculture and Food Research Initiative Grant (2017-05741), an NIH 4D Nucleome Grant  
1111 (U01HL130010), and an NIH Encyclopedia of DNA Elements Mapping Center Award (UM1HG009375).  
1112
